# Supplementary material for: Carboxylic acid-assisted sterically demanding reductive cross-coupling between cycloalkenyl and alkyl bromides
Source: Royal Society of Chemistry journal article supplement (doi:10.1039/d3qo00155e), 2023-01-01

## Electronic supplementary information

### **Carboxylic Acid-Assisted Sterically Demanding Reductive Cross-Coupling between Cycloalkenyl and Alkyl Bromides**

**Jinglin An,<sup>†</sup> Xue Zhou,<sup>†</sup> Yifan Zhang, Zhenfei Ye, Qianyou Guo, Hao Song, Zhenlei Song,\* Xiao-Yu Liu and Yong Qin\*\***

*Key Laboratory of Drug-Targeting and Drug Delivery System of the Education Ministry and Sichuan Province, Sichuan Engineering Laboratory for Plant-Sourced Drug and Sichuan Research Center for Drug Precision Industrial Technology, West China School of Pharmacy, Sichuan University, Chengdu, 610041, China.*

## Table of Contents

|                                                                             |     |
|-----------------------------------------------------------------------------|-----|
| 1. General Information .....                                                | S3  |
| 2. Optimization of the Reaction Conditions .....                            | S4  |
| 3. General Procedure for the Ni-Catalyzed Cross-Electrophile Coupling ..... | S9  |
| 4. Synthesis and Characterization of Substrate .....                        | S10 |
| 5. Control Experiments.....                                                 | S15 |
| 6. Characterization Data .....                                              | S17 |
| 7. References .....                                                         | S40 |
| 8. NMR Spectra.....                                                         | S41 |

## 1. General Information

All reactions that require anhydrous conditions were performed in flame-dried glassware under Ar atmosphere and all the commercial reagents were used without purification unless otherwise noted. Solvent purification was conducted according to Purification of Laboratory Chemicals (Peerrin, D. D.; Armarego, W. L. and Perrins, D. R., Pergamon Press: Oxford, 1980). The products were purified by flash column chromatography on silica gel (200-300 meshes) from the Anhui Liangchen Silicon Material Company (China). Reactions were monitored by thin layer chromatography (TLC) supplied by Yantai Chemicals (China). Visualization was accomplished with UV light, exposure to iodine, stained with ethanolic solution of phosphomolybdic acid or basic solution of  $\text{KMnO}_4$ .  $^1\text{H}$  NMR and  $^{13}\text{C}$  NMR spectra were recorded on Varian INOVA-400/54 and Agilent DD2-600/54 instruments and calibrated by using residual undeuterated chloroform ( $\delta$ ,  $^1\text{H}$  NMR = 7.26,  $^{13}\text{C}$  NMR = 77.16). The following abbreviations were used to explain the multiplicities: s = singlet, d = doublet, t = triplet, q = quartet, br = broad, td = triple doublet, dt = double triplet, m = multiplet, and coupling constants ( $J$ ) are reported in Hertz (Hz). Infrared (IR) spectra were recorded on a Perkin Elmer Spectrum Two FT-IR spectrometer. The specific optical rotation was obtained from *Rudolph Research Analytical Autopol VI* automatic polarimeter. High-resolution mass spectra (HRMS) were recorded on Bruker Apex IV FTMS or Thermo Scientific LTQ Orbitrap XL ESI mass spectrometers. LC-MS analysis was performed on HP Agilent 6420 Triple Quad LC/MS.

## 2. Optimization of the Reaction Conditions

**Table S1. Effect of Ligands**

| Entry | Ligand     | Yield (%) <sup>b</sup> |
|-------|------------|------------------------|
| 1     | No         | NR                     |
| 2     | <b>L1</b>  | 73                     |
| 3     | <b>L2</b>  | 50                     |
| 4     | <b>L3</b>  | 42                     |
| 5     | <b>L4</b>  | 32                     |
| 6     | <b>L5</b>  | 30                     |
| 7     | <b>L6</b>  | 24                     |
| 8     | <b>L7</b>  | 17                     |
| 9     | <b>L8</b>  | 10                     |
| 10    | <b>L9</b>  | 5                      |
| 11    | <b>L10</b> | 35                     |
| 12    | <b>L11</b> | 30                     |
| 13    | <b>L12</b> | 42                     |
| 14    | <b>L13</b> | 9                      |

<sup>a</sup>Alkenyl bromide **1a** (0.53 mmol, 1.0 equiv.) and alkyl bromide **2a** (2.0 equiv.) were used in all reactions unless otherwise stated. <sup>b</sup>Yields were determined according to the isolated material.

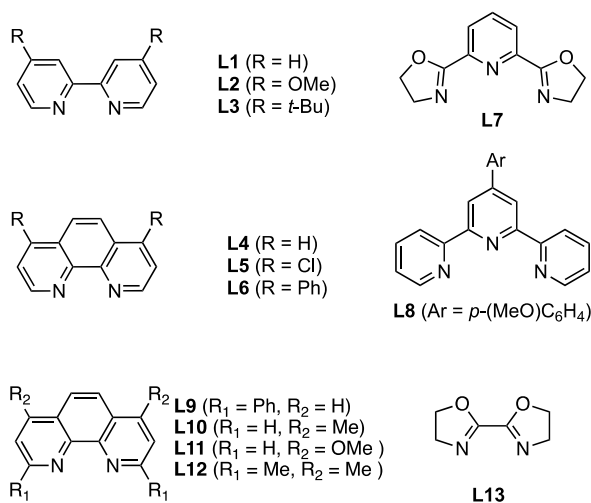

**Table S2. Effect of Solvents**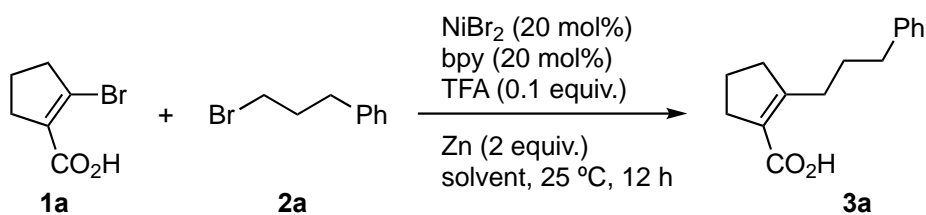

| Entry | Solvent            | Yield (%) <sup>b</sup> |
|-------|--------------------|------------------------|
| 1     | DMSO               | 73                     |
| 2     | pyridine           | 25                     |
| 3     | DMPU               | 8                      |
| 4     | NMP                | NR                     |
| 5     | DMF                | 15                     |
| 6     | CH <sub>3</sub> CN | NR                     |
| 7     | THF                | NR                     |
| 8     | CHCl <sub>3</sub>  | NR                     |
| 9     | PhMe               | NR                     |
| 10    | PhH                | NR                     |
| 11    | DCM                | NR                     |
| 12    | dioxane            | NR                     |
| 13    | TBME               | NR                     |
| 14    | PhOMe              | NR                     |
| 15    | DME                | NR                     |

<sup>a</sup>Alkenyl bromide **1a** (0.53 mmol, 1.0 equiv.) and alkyl bromide **2a** (2.0 equiv.) were used in all reactions unless otherwise stated. <sup>b</sup>Yields were determined according to the isolated material.

**Table S3. Effect of Additives**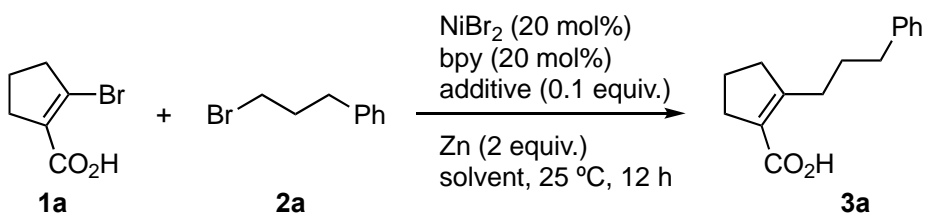

| Entry | Additive | Yield (%) <sup>b</sup> |
|-------|----------|------------------------|
| 1     | NO       | Trace                  |
| 2     | TFA      | 73                     |
| 3     | NaI      | 68                     |

|   |          |    |
|---|----------|----|
| 4 | TBAI     | 43 |
| 5 | TMSCl    | 36 |
| 6 | LiBr     | 38 |
| 7 | pyridine | 42 |

<sup>a</sup>Alkenyl bromide **1a** (0.53 mmol, 1.0 equiv.) and alkyl bromide **2a** (2.0 equiv.) were used in all reactions unless otherwise stated. <sup>b</sup>Yields were determined according to the isolated material.

**Table S4. Effect of Ni (cat.)**

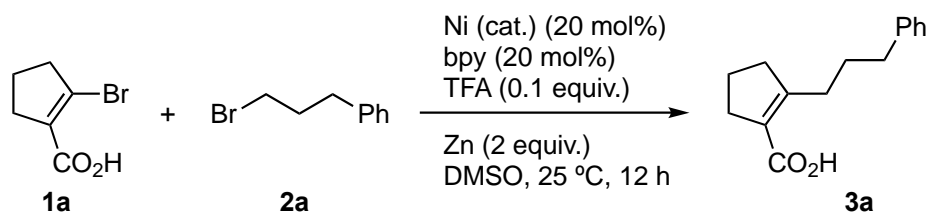

| Entry | Ni (cat.)                                             | Yield (%) <sup>b</sup> |
|-------|-------------------------------------------------------|------------------------|
| 1     | NiCl <sub>2</sub>                                     | 64                     |
| 2     | NiBr <sub>2</sub>                                     | 73                     |
| 3     | NiI <sub>2</sub>                                      | 92                     |
| 4     | NiCl <sub>2</sub> ·6H <sub>2</sub> O                  | 50                     |
| 5     | NiCl <sub>2</sub> (PPh <sub>3</sub> ) <sub>2</sub>    | 49                     |
| 6     | Ni(acac) <sub>2</sub>                                 | 26                     |
| 7     | Ni(CO) <sub>2</sub> (PPh <sub>3</sub> ) <sub>2</sub>  | 73                     |
| 8     | Ni(OTf) <sub>2</sub>                                  | 29                     |
| 9     | Ni(COD) <sub>2</sub>                                  | 39                     |
| 10    | NiBr <sub>2</sub> ·3H <sub>2</sub> O                  | 22                     |
| 11    | Ni(DPPE)Cl <sub>2</sub>                               | 37                     |
| 12    | NiCl <sub>2</sub> (PCy <sub>3</sub> ) <sub>2</sub>    | 72                     |
| 13    | (DPPP)NiCl <sub>2</sub>                               | 66                     |
| 14    | (dme)NiCl <sub>2</sub>                                | 48                     |
| 15    | NiI <sub>2</sub> ·6H <sub>2</sub> O                   | 55                     |
| 16    | Ni(OAc) <sub>2</sub> ·4H <sub>2</sub> O               | 54                     |
| 17    | NiCl(PPh <sub>3</sub> ) <sub>2</sub> (dppf)           | 81                     |
| 18    | NiBr <sub>2</sub> (PPh) <sub>3</sub>                  | 52                     |
| 19    | (dme)NiBr <sub>2</sub>                                | 85                     |
| 20    | Ni(ClO <sub>4</sub> ) <sub>2</sub> ·6H <sub>2</sub> O | 60                     |

<sup>a</sup>Alkenyl bromide **1a** (0.53 mmol, 1.0 equiv.) and alkyl bromide **2a** (2.0 equiv.) were used in all reactions unless otherwise stated. <sup>b</sup>Yields were determined according to the isolated material.

**Table S5. Effect of Reducing Agents**

| Entry | M  | Yield (%) <sup>b</sup> |
|-------|----|------------------------|
| 1     | Zn | 92                     |
| 2     | Mn | <5                     |
| 3     | Fe | NR                     |

<sup>a</sup>Alkenyl bromide **1a** (0.53 mmol, 1.0 equiv.) and alkyl bromide **2a** (2.0 equiv.) were used in all reactions unless otherwise stated. <sup>b</sup>Yields were determined according to the isolated material.

**Table S6. Effect of Different Loading of Ni (cat.) and Ligands**

| Entry | x   | Yield (%) <sup>b</sup> |
|-------|-----|------------------------|
| 1     | 25  | 89                     |
| 2     | 20  | 92                     |
| 3     | 15  | 88                     |
| 4     | 10  | 75 <sup>c</sup>        |
| 5     | 7.5 | 69 <sup>c</sup>        |
| 6     | 5   | 52 <sup>c</sup>        |

<sup>a</sup>Alkenyl bromide **1a** (0.53mmol, 1.0 equiv.) and alkyl bromide **2a** (2.0 equiv.) were used in all reactions unless otherwise stated. <sup>b</sup>Yields were determined according to the isolated material. <sup>c</sup>The reaction time was 24 h.

**Table S7. Effect of Different Equivalent of Reducing Agents**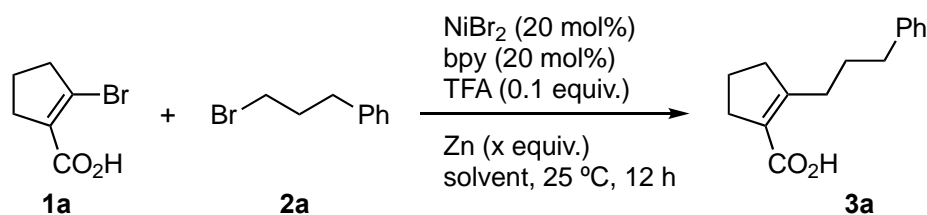

| Entry | equivalent | Yield (%) <sup>b</sup> |
|-------|------------|------------------------|
| 1     | 2.5        | 89                     |
| 2     | 2.0        | 92                     |
| 3     | 1.75       | 74 <sup>c</sup>        |
| 4     | 1.5        | 67 <sup>c</sup>        |
| 5     | 1.25       | 63 <sup>c</sup>        |

<sup>a</sup>Alkenyl bromide **1a** (0.53 mmol, 1.0 equiv.) and alkyl bromide **2a** (2.0 equiv.) were used in all reactions unless otherwise stated. <sup>b</sup>Yields were determined according to the isolated material. <sup>c</sup>The reaction time was 24 h.

**Table S8. Effect of Different Equivalent of Alkyl Bromide**

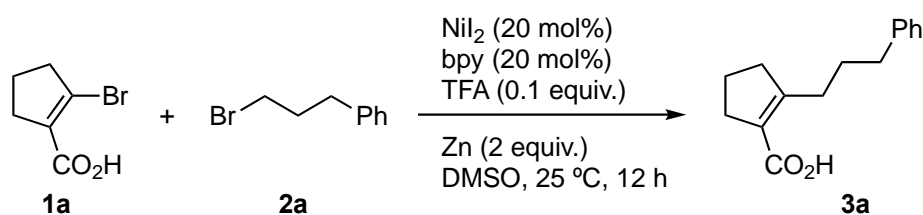

| Entry | Equivalent of <b>2a</b> | Yield (%) <sup>b</sup> |
|-------|-------------------------|------------------------|
| 1     | 2.5                     | 89                     |
| 2     | 2.25                    | 90                     |
| 3     | 2.0                     | 92                     |
| 4     | 1.75                    | 84 <sup>c</sup>        |
| 5     | 1.5                     | 78 <sup>c</sup>        |
| 6     | 1.25                    | 70 <sup>c</sup>        |

<sup>a</sup>Alkenyl bromide **1a** (0.53 mmol, 1.0 equiv.) and alkyl bromide **2a** (x equiv.) were used in all reactions unless otherwise stated. <sup>b</sup>Yields were determined according to the isolated material. <sup>c</sup>The reaction time was 24 h.

**Table S9. Effect of Temperature**

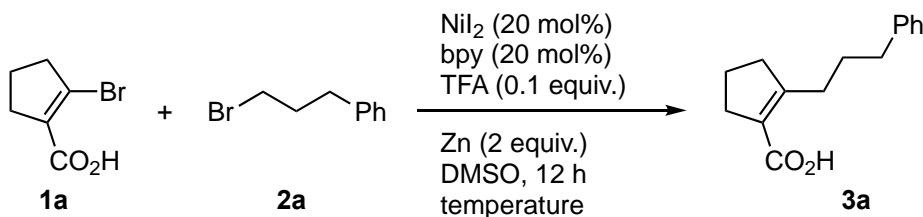

| Entry | Temperature | Yield (%) <sup>b</sup> |
|-------|-------------|------------------------|
| 1     | 0 °C        | NR                     |
| 2     | RT          | 92                     |

|   |       |    |
|---|-------|----|
| 3 | 50 °C | 85 |
| 4 | 75 °C | 75 |

<sup>a</sup>Alkenyl bromide **1a** (0.530 mmol, 1.0 equiv.) and alkyl bromide **2a** (2.0 equiv.) were used in all reactions unless otherwise stated. <sup>b</sup>Yields were determined according to the isolated material.

**Table S10. Effect of Concentration of 1a**

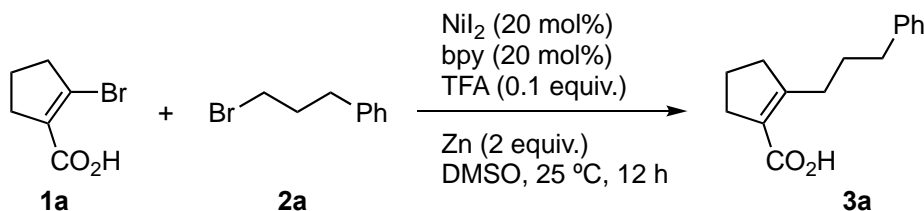

| Entry | Conc.(mmol/mL) of <b>1a</b> | Yield (%) <sup>b</sup> |
|-------|-----------------------------|------------------------|
| 1     | 0.075                       | 88                     |
| 2     | 0.1                         | <b>92</b>              |
| 3     | 0.25                        | 62 <sup>c</sup>        |
| 4     | 0.5                         | 56 <sup>c</sup>        |
| 5     | 0.75                        | 54 <sup>c</sup>        |
| 6     | 1.0                         | 51 <sup>c</sup>        |

<sup>a</sup>Alkenyl bromide **1a** (0.530 mmol, 1.0 equiv.) and alkyl bromide **2a** (2.0 equiv.) were used in all reactions unless otherwise stated. <sup>b</sup>Yields were determined according to the isolated material. <sup>c</sup>The reaction time was 24 h.

### 3. General Procedure for the Ni-Catalyzed Cross-Electrophile Coupling

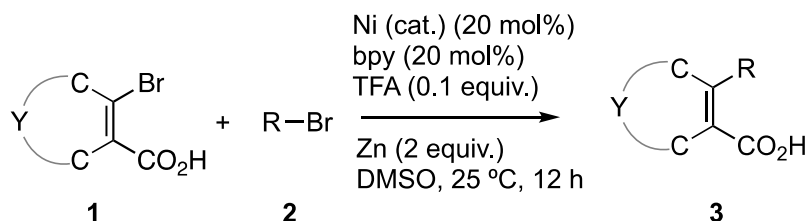

Under argon atmosphere, a solution of acid (100 mg, 1.0 equiv), NiI<sub>2</sub> (0.2 equiv), bpy (0.2 equiv), Zn (2.0 equiv), alkyl bromide compound (2.0 equiv) and TFA (0.1 equiv) in degassed dry DMSO (6 mL) was stirred at room temperature. The mixture was stirred at room temperature for 12 h, after the reaction was completed as indicated by TLC and LC-MS, it was carefully quenched with 0.5-1.0 N HCl aqueous solution (6 mL), and extracted with methyl *tert*-butyl ether (3 × 20 mL). The combined organic phase was dried over

anhydrous  $\text{MgSO}_4$  and concentrated under vacuum. The crude residue was purified by silica gel flash column chromatography (petroleum ether/ethyl acetate 30/1 to 5/1, v/v, containing 0.5% acetic acid) to afford the corresponding coupling product.

#### 4. Synthesis and Characterization of Substrate

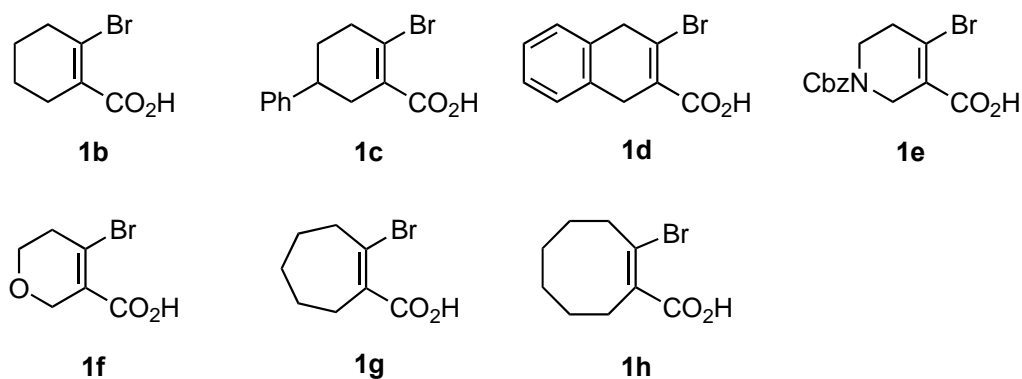

Compounds **1b–1h** were prepared according to literature methods.<sup>1–3</sup>

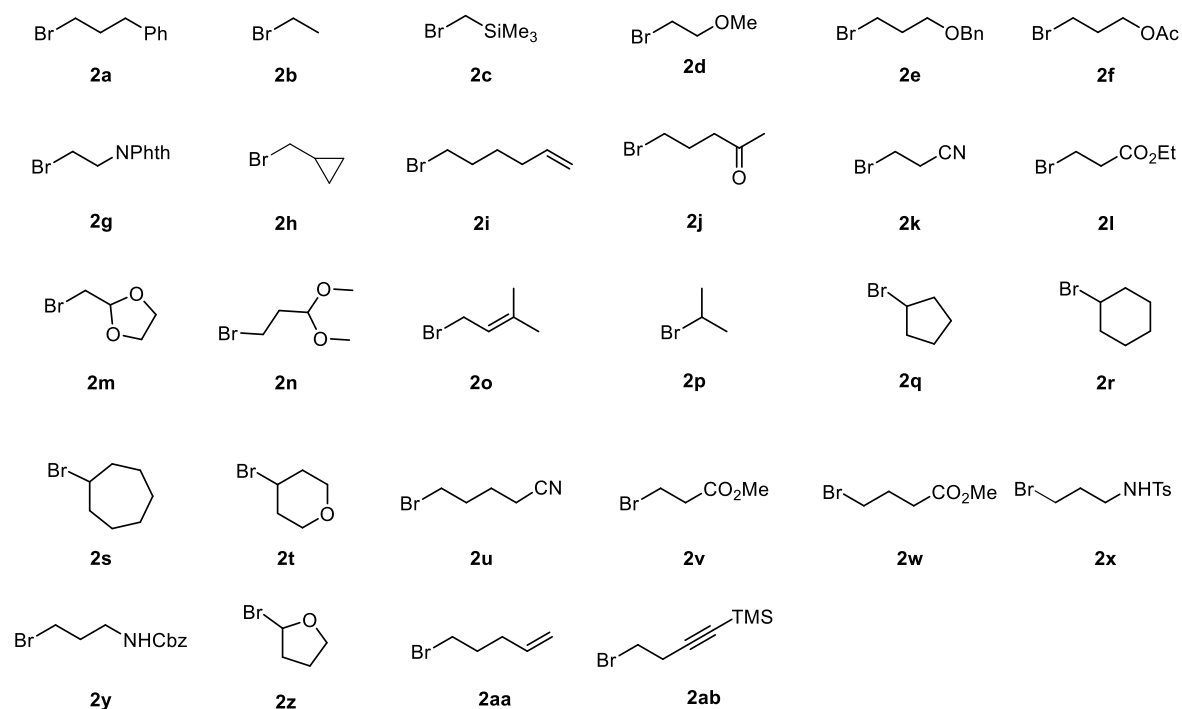

Compounds **2a–2ab** are commercially available.

## Synthesis of Substrate **1i**

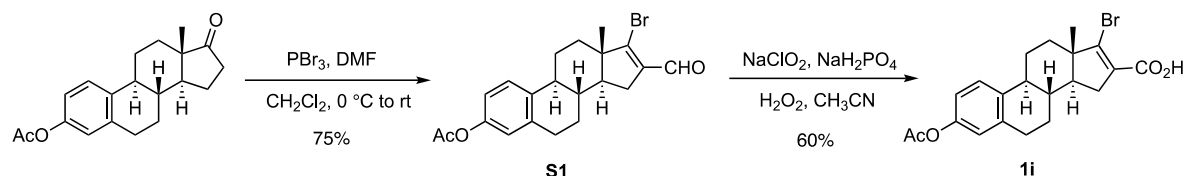

To a mixture of DMF (2.5 mL) and  $\text{CH}_2\text{Cl}_2$  (20 mL) was slowly added  $\text{PBr}_3$  (16.0 mmol, 2.0 equiv, 1.5 mL) at 0 °C under Ar. The pale yellow slurry was stirred at room temperature for 2 h. A solution of Estrone (8.0 mmol, 1.0 equiv, 2.5 g) in  $\text{CH}_2\text{Cl}_2$  (5 mL) was added dropwise to the above solution at room temperature. The mixture was stirred at this temperature for 2 h, then poured into NaOH aqueous solution (20 mL), and extracted with ethyl acetate ( $3 \times 20$  mL). The extract was dried over  $\text{MgSO}_4$ . The organic phase was removed under reduced pressure, and the crude product was purified by column chromatography (eluent: petroleum ether/EtOAc = 10/1, v/v) to afford **S1** (2.4 g, 75%).

A solution of  $\text{NaClO}_2$  (8.4 mmol, 1.4 equiv, 0.9 g) in water (10 mL) was added dropwise in 2 h to a stirred mixture of **S1** (6.0 mmol, 1.0 equiv, 2.4 g) in  $\text{CH}_3\text{CN}$  (10.0 mL),  $\text{NaH}_2\text{PO}_4$  (1.6 mmol, 0.27 equiv, 0.2 g) in water (5 mL) and 30% aqueous  $\text{H}_2\text{O}_2$  (0.7 mL), keeping the temperature at 0 °C with water cooling. After completion of the reaction (monitored by TLC), the mixture was poured into saturated  $\text{Na}_2\text{CO}_3$  aqueous solution, and washed with ethyl acetate. The aqueous phase was poured into HCl solution, and extracted with ethyl acetate. The extract was dried over  $\text{MgSO}_4$ . The organic phase was removed under reduced pressure and the crude product was purified by column chromatography (eluent: petroleum ether/EtOAc = 3/1, v/v) to afford **1i** (1.5 g, 60%). Amorphous powder;  $R_f = 0.55$  (petroleum ether/ethyl acetate 2/1, v/v, containing 0.5% acetic acid);  $^1\text{H}$  NMR (400 MHz,  $\text{CDCl}_3$ )  $\delta$  7.27 (d,  $J = 8.4$  Hz, 1H), 6.92 – 6.79 (m, 2H), 2.92 (dt,  $J = 8.8, 4.4$  Hz, 2H), 2.68 (dd,  $J = 14.8, 6.4$  Hz, 1H), 2.44 (m, 1H), 2.31 (d,  $J = 14.8$  Hz, 5H), 2.03 – 1.92 (m, 2H), 1.78 (m, 1H), 1.72 – 1.52 (m, 3H), 1.46 (m, 1H), 0.94 (s, 3H);  $^{13}\text{C}$  NMR (100 MHz,  $\text{CDCl}_3$ )  $\delta$  170.0, 169.8, 149.8, 148.7, 138.1, 137.5, 130.5, 126.2, 121.7, 118.8, 53.3, 52.3, 44.3, 37.2, 34.6, 32.7, 29.4, 27.0, 26.0, 21.2, 15.2; IR (neat):  $\nu_{\text{max}} = 2927, 2870, 1766, 1691, 1664, 1588, 1495, 1370,$



= 2924, 2854, 1763, 1667, 1607, 1495, 1454, 1370, 1257, 1207, 1090, 1015, 942, 900, 800, 751, 699, 667, 564, 493, 439  $\text{cm}^{-1}$ ; HRMS (ESI):  $m/z$  calculated for  $\text{C}_{22}\text{H}_{29}\text{BrO}_4$ ,  $[\text{M} - \text{H}]^-$  435.1176, found, 435.1159;  $[\alpha]_{\text{D}}^{25} = +34.14$  (c 0.74,  $\text{CHCl}_3$ ).

### Synthesis of Substrate 1k

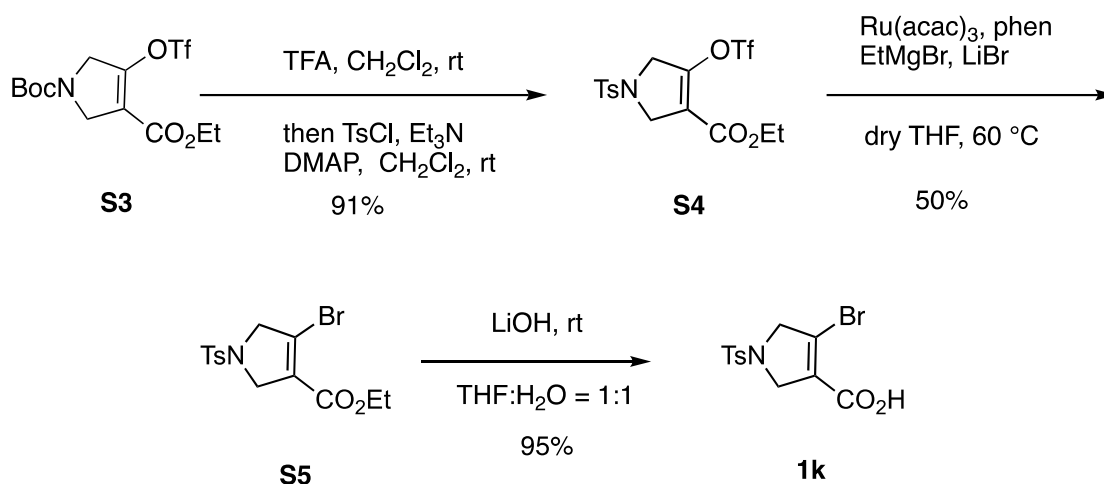

**S3** (0.510 mmol, 1.0 equiv, 0.2 g) in  $\text{CH}_2\text{Cl}_2$  (5 mL) was stirred with TFA (13.0 mmol, 25.5 equiv, 1.0 mL) at room temperature for 3 h. The solvent was removed under reduced pressure. Then the crude residue was dissolved in  $\text{CH}_2\text{Cl}_2$  (5 mL), to which were sequentially added  $\text{Et}_3\text{N}$  (1.5 mmol, 3.0 equiv, 0.2 mL), DMAP (0.26 mmol, 0.5 equiv, 31.0 mg) and TsCl (1.0 mmol, 2.0 equiv, 196 mg). The solution was stirred at room temperature for 2 h. The reaction was extracted with water (15 mL). The organic layer was dried over  $\text{MgSO}_4$ , filtered, and concentrated under reduced pressure. The crude residue was purified by silica gel flash column chromatography (petroleum ether/ethyl acetate 12/1 to 8/1, v/v) to afford **S4** (207 mg, 91%). White solid;  $R_f = 0.32$  (petroleum ether/ethyl acetate 6/1, v/v);  $^1\text{H}$  NMR (400 MHz,  $\text{CDCl}_3$ )  $\delta$  7.71 (d,  $J = 8.0$  Hz, 2H), 7.36 (d,  $J = 8.0$  Hz, 2H), 4.34 (s, 4H), 4.24 (q,  $J = 7.2$  Hz, 2H), 2.44 (s, 3H), 1.28 (t,  $J = 7.2$  Hz, 3H);  $^{13}\text{C}$  NMR (100 MHz,  $\text{CDCl}_3$ )  $\delta$  159.5, 145.9, 144.8, 133.1, 130.3, 127.6, 119.5, 118.3 (q,  $J = 319$  Hz), 62.1, 52.5, 51.9, 21.7, 14.0; IR (neat):  $\nu_{\text{max}} = 2986, 2863, 1732, 1691, 1598, 1427, 1345, 1275, 1215, 1200, 1152, 1136, 1100, 1042, 853, 817, 756, 709, 682, 620, 596, 584, 529, 502, 470, 420, 410$   $\text{cm}^{-1}$ ; HRMS (ESI):  $m/z$  calculated for  $\text{C}_{15}\text{H}_{16}\text{F}_3\text{NO}_7\text{S}_2$ ,  $[\text{M} + \text{Na}]^+$  466.0212, found, 466.0214.

To a THF solution (0.9 mL) of Ru(acac)<sub>3</sub> (0.038 mmol, 0.06 equiv, 10.8 mg), o-phenanthroline (0.038 mmol, 0.06 equiv, 10.8 mg) and LiBr (0.54 mmol, 1.2 equiv, 47 mg) placed in an oven-dried Schlenk tube was added ethylmagnesium bromide (0.11 mmol, 1.0 M THF solution, 0.1 mL). After stirring for 10 min at room temperature, **S4** (0.45 mmol, 1.0 equiv, 200 mg) was added at 20 °C and stirring was continued for 72 h.<sup>4</sup> The reaction was concentrated under reduced pressure. Purification by passing through a pad of silica gel using Dichloromethane/Acetonitrile (200/1, v/v) afforded **S5** (85 mg, 50%). Amorphous powder; R<sub>f</sub> = 0.55 (petroleum ether/ethyl acetate 6/1 ~10/1, v/v); <sup>1</sup>H NMR (400 MHz, CDCl<sub>3</sub>) δ 7.73 (d, J = 8.2 Hz, 2H), 7.35 (d, J = 8.0 Hz, 2H), 4.40 – 4.25 (m, 4H), 4.21 (q, J = 7.2 Hz, 2H), 2.44 (s, 3H), 1.29 (t, J = 7.2 Hz, 3H); <sup>13</sup>C NMR (100 MHz, CDCl<sub>3</sub>) δ 161.1, 144.4, 133.4, 130.2, 127.7, 124.7, 61.5, 61.3, 55.1, 21.7, 14.2; IR (neat): ν<sub>max</sub> = 2987, 2926, 2856, 1725, 1709, 1641, 1597, 1452, 1494, 1452, 1346, 1305, 1288, 1263, 1162, 1097, 1084, 1016, 948, 861, 835, 815, 761, 708, 668, 617, 610, 563, 547, 510, 465, 410 cm<sup>-1</sup>; HRMS (ESI): m/z calculated for C<sub>14</sub>H<sub>16</sub>BrNO<sub>4</sub>S, [M + Na]<sup>+</sup> 395.9876, found, 395.9880.

A round bottom flask was charged with **S5** (0.27 mmol, 1.0 equiv, 100 mg), LiOH (2.7 mmol, 10.0 equiv, 64 mg), and THF/H<sub>2</sub>O (1/1, v/v, 0.1 M). The reaction was stirred at room temperature 12h before it was acidified with 3 N HCl. The aqueous phase was extracted with ethyl acetate (3 × 10 mL). The combined organic phase was dried over anhydrous MgSO<sub>4</sub>, filtered, and evaporated under reduced pressure. The residue was purified by column chromatography on silica gel (dichloromethane/methanol = 10/1 ~ 5/1, v/v) to give the corresponding unsaturated acid **1k** (175 mg, 95%). Amorphous powder; R<sub>f</sub> = 0.61 (dichloromethane/methanol = 10/1, v/v); <sup>1</sup>H NMR (400 MHz, DMSO-*d*<sub>6</sub>) δ 7.77 (d, J = 8.2 Hz, 2H), 7.45 (d, J = 8.0 Hz, 2H), 4.34 (t, J = 4.3 Hz, 2H), 4.16 (t, J = 4.3 Hz, 2H), 2.40 (s, 3H); <sup>13</sup>C NMR (100 MHz, DMSO-*d*<sub>6</sub>) δ 162.1, 144.1, 132.6, 130.2, 127.5, 60.7, 55.0, 21.0; IR (neat): ν<sub>max</sub> = 2986, 2863, 1732, 1691, 1598, 1427, 1345, 1275, 1215, 1200, 1152, 1136, 1100, 1042, 853, 817, 756, 709, 682, 620, 596, 584, 529, 502, 470, 420, 410 cm<sup>-1</sup>; HRMS (ESI): m/z calculated for C<sub>12</sub>H<sub>12</sub>BrNO<sub>4</sub>S, [M – H]<sup>-</sup> 343.9598, found, 343.9590.

## Synthesis of Substrate 8

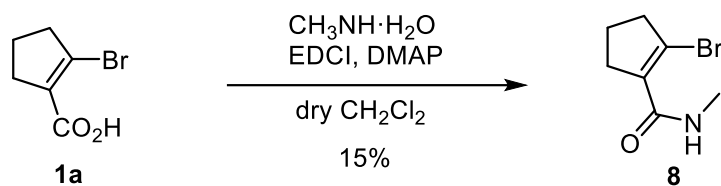

**1a** (1.05 mmol, 1.0 equiv, 0.2 g) in  $\text{CH}_2\text{Cl}_2$  (10 mL) was stirred with  $\text{CH}_3\text{NH}\cdot\text{H}_2\text{O}$  (13.0 mmol, 25.5 equiv, 1.0 mL), DMAP (1.05 mmol, 1.0 equiv, 122 mg) and EDCI (1.58 mmol, 1.5 equiv, 301.9 mg) at room temperature for 12 h. The reaction was extracted with water (15 mL). The organic layer was dried over  $\text{MgSO}_4$ , filtered, and concentrated under reduced pressure. The crude residue was purified by silica gel flash column chromatography (petroleum ether/ethyl acetate 12/1 to 4/1, v/v) to afford **8** (29 mg, 15%). Amorphous powder;  $R_f = 0.25$  (petroleum ether/ethyl acetate = 5/1, v/v);  $^1\text{H}$  NMR (600 MHz,  $\text{CDCl}_3$ )  $\delta$  6.42 (s, 1H), 2.91 (dd,  $J = 5.2, 1.8$  Hz, 3H), 2.87 – 2.76 (m, 2H), 2.70 (t,  $J = 6.2$  Hz, 2H), 1.95 (p,  $J = 6.8$  Hz, 2H);  $^{13}\text{C}$  NMR (100 MHz,  $\text{CDCl}_3$ )  $\delta$  164.8, 136.1, 122.9, 42.9, 33.9, 26.3, 21.4; IR (neat):  $\nu_{\text{max}} = 3310, 2936, 2851, 1643, 1532, 1441, 1408, 1303, 1164, 1092, 913, 679, 644, 464$   $\text{cm}^{-1}$ ; HRMS (ESI):  $m/z$  calculated for  $\text{C}_7\text{H}_{10}\text{BrNO}$ ,  $[\text{M} + \text{Na}]^+ 202.9946$ , found, 202.9941.

## 5. Control Experiments

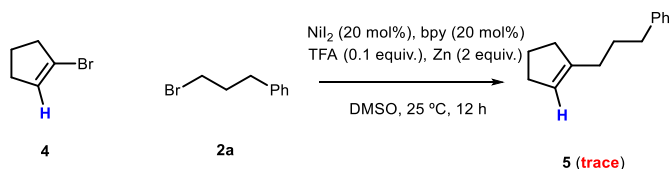

Under argon atmosphere, a solution of acid **4** (100 mg, 1.0 equiv),  $\text{NiI}_2$  (0.2 equiv), bpy (0.2 equiv), Zn (2.0 equiv), **2a** (2.0 equiv) and TFA (0.1 equiv) in degassed dry DMSO (6 mL) was stirred at room temperature for 12 h. After the reaction was completed as indicated by TLC and LC-MS, it was carefully quenched with 0.5–1.0 N HCl aqueous solution (6 mL), and extracted with methyl *tert*-butyl ether ( $3 \times 20$  mL). The combined organic phase was dried over anhydrous  $\text{MgSO}_4$  and concentrated under vacuum. The crude residue was purified by silica gel flash column chromatography (petroleum ether/ethyl acetate 30/1 to 5/1, v/v, containing 0.5% acetic acid) to afford the corresponding coupling product.

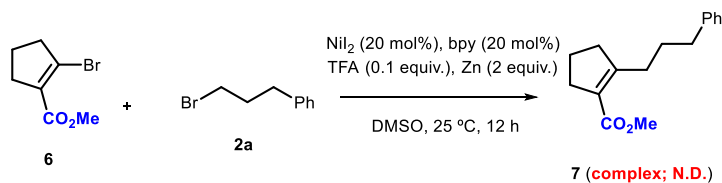

Under argon atmosphere, a solution of acid **6** (100 mg, 1.0 equiv), NiI<sub>2</sub> (0.2 equiv), bpy (0.2 equiv), Zn (2.0 equiv), **2a** (2.0 equiv) and TFA (0.1 equiv) in degassed dry DMSO (6 mL) was stirred at room temperature for 12 h. After the reaction was completed as indicated by TLC and LC-MS, it was carefully quenched with 0.5–1.0 N HCl aqueous solution (6 mL), and extracted with methyl *tert*-butyl ether (3 × 20 mL). The combined organic phase was dried over anhydrous MgSO<sub>4</sub> and concentrated under vacuum. The crude residue was purified by silica gel flash column chromatography (petroleum ether/ethyl acetate 30/1 to 5/1, v/v, containing 0.5% acetic acid) to afford the corresponding coupling product.

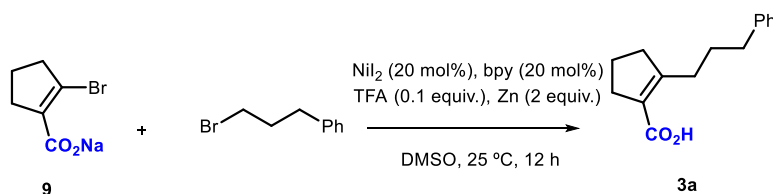

Under argon atmosphere, a solution of acid **9** (110.5 mg, 1.0 equiv), NiI<sub>2</sub> (0.2 equiv), bpy (0.2 equiv), Zn (2.0 equiv), **2a** (2.0 equiv) and TFA (0.1 equiv) in degassed dry DMSO (6 mL) was stirred at room temperature for 12 h. After the reaction was completed as indicated by TLC and LC-MS, it was carefully quenched with 0.5–1.0 N HCl aqueous solution (6 mL), and extracted with methyl *tert*-butyl ether (3 × 20 mL). The combined organic phase was dried over anhydrous MgSO<sub>4</sub> and concentrated under vacuum. The crude residue was purified by silica gel flash column chromatography (petroleum ether/ethyl acetate 30/1 to 5/1, v/v, containing 0.5% acetic acid) to afford the coupling product **3a** (101mg, 84%).

## 6. Characterization Data

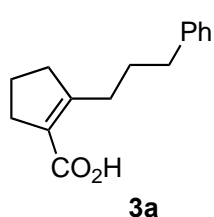

The reaction was conducted according to general experimental procedure noted above, which proceeded at room temperature for 12 hours to give compound **3a** (110 mg, 92% yield) as an amorphous powder.  $R_f = 0.74$  (petroleum ether/ethyl acetate 2/1, v/v, containing 0.5% acetic acid);  $^1\text{H}$  NMR (400 MHz,  $\text{CDCl}_3$ )  $\delta$  7.24 (t,  $J = 7.2$  Hz, 2H), 7.20 – 7.11 (m, 3H), 2.64 (m, 6H), 2.49 (t,  $J = 7.6$  Hz, 2H), 1.78 (m, 4H);  $^{13}\text{C}$  NMR (100 MHz,  $\text{CDCl}_3$ )  $\delta$  172.1, 163.1, 142.3, 128.5, 128.4, 127.2, 125.9, 38.7, 36.1, 33.5, 30.1, 29.9, 21.5; IR (neat):  $\nu_{\text{max}} = 3026, 2921, 1604, 1495, 1460, 1081, 1030, 726, 693, 542, 520, 463, 436, 407\text{ cm}^{-1}$ ; HRMS (ESI):  $m/z$  calculated for  $\text{C}_{15}\text{H}_{17}\text{O}_2$ ,  $[\text{M} - \text{H}]^-$  229.1234, found, 229.1225.

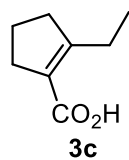

The reaction was conducted according to general experimental procedure noted above, which proceeded at room temperature for 12 hours to give compound **3c** (110 mg, 92% yield) as an amorphous powder.  $R_f = 0.71$  (petroleum ether/ethyl acetate 2/1, v/v, containing 0.5% acetic acid);  $^1\text{H}$  NMR (400 MHz,  $\text{CDCl}_3$ )  $\delta$  2.63 (m, 4H), 2.54 (t,  $J = 7.6$  Hz, 2H), 1.83 (m, 2H), 1.05 (t,  $J = 7.6$  Hz, 3H);  $^{13}\text{C}$  NMR (100 MHz,  $\text{CDCl}_3$ )  $\delta$  171.6, 165.0, 126.1, 38.2, 33.6, 23.5, 21.5, 12.6; IR (neat):  $\nu_{\text{max}} = 2961, 2918, 2862, 2623, 2573, 1678, 1660, 1626, 1454, 1431, 1412, 1372, 1350, 1299, 1249, 1136, 1121, 1059, 1014, 939, 750, 775, 556, 508, 431, 413\text{ cm}^{-1}$ ; HRMS (ESI):  $m/z$  calculated for  $\text{C}_8\text{H}_{12}\text{O}_2$ ,  $[\text{M} - \text{H}]^-$  139.0765, found, 139.0759.

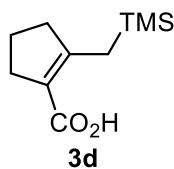

The reaction was conducted according to general experimental procedure noted above, which proceeded at room temperature for 12 hours to give compound **3d** (80 mg, 75% yield) as an amorphous powder.  $R_f = 0.63$  (petroleum ether/ethyl acetate 2/1, v/v, containing 0.5% acetic acid);  $^1\text{H}$  NMR (400 MHz,  $\text{CDCl}_3$ )  $\delta$  2.62 (t,  $J = 7.2$  Hz, 2H), 2.46 (t,  $J = 7.6$  Hz, 2H), 2.31 (s, 2H), 1.80 (m, 2H), 0.05 (s, 9H);  $^{13}\text{C}$  NMR (100 MHz,  $\text{CDCl}_3$ )  $\delta$  72.2, 163.6, 122.9, 41.7, 33.1, 24.2, 21.9, -0.6; IR (neat):  $\nu_{\text{max}} = 2953, 2592, 1652, 1606, 1431, 1413, 1338, 1413, 1301, 1276, 1276, 1248, 1206, 1151, 1124, 1028, 970, 884, 837, 779, 739, 694, 612, 546, 492, 427, 409\text{ cm}^{-1}$ ; HRMS (ESI):

m/z calculated for C<sub>10</sub>H<sub>18</sub>O<sub>2</sub>Si, [M – H]<sup>–</sup> 197.1003, found, 197.1006.

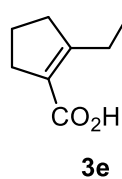

The reaction was conducted according to general experimental procedure noted above, which proceeded at room temperature for 12 hours to give compound **3e** (53 mg, 59% yield) as an amorphous powder. *R<sub>f</sub>* = 0.6 (petroleum ether/ethyl acetate 2/1, v/v, containing 0.5% acetic acid); <sup>1</sup>H NMR (400 MHz, CDCl<sub>3</sub>) δ 3.53 (t, *J* = 6.4 Hz, 2H), 3.35 (s, 3H), 2.87 (t, *J* = 6.4 Hz, 2H), 2.65 (t, *J* = 7.6 Hz, 2H), 2.57 (t, *J* = 7.2 Hz, 2H), 1.84 (m, 2H); <sup>13</sup>C NMR (100 MHz, CDCl<sub>3</sub>) δ 170.8, 158.5, 129.1, 70.9, 58.7, 39.1, 33.7, 30.6, 21.5; IR (neat): ν<sub>max</sub> = 3061, 2928, 2870, 1674, 1632, 1430, 1265, 1195, 1110, 1066, 949, 817, 733, 706, 563, 411 cm<sup>–1</sup>; HRMS (ESI): m/z calculated for C<sub>9</sub>H<sub>14</sub>O<sub>3</sub>, [M – H]<sup>–</sup> 169.0870, found, 169.0867.

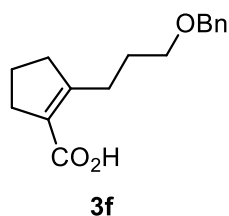

The reaction was conducted according to general experimental procedure noted above, which proceeded at room temperature for 12 hours to give compound **3f** (89 mg, 65% yield) as an amorphous powder. *R<sub>f</sub>* = 0.50 (petroleum ether/ethyl acetate 2/1, v/v, containing 0.5% acetic acid); <sup>1</sup>H NMR (400 MHz, CDCl<sub>3</sub>) δ 7.32 – 7.16 (m, 5H), 4.42 (s, 2H), 3.41 (t, *J* = 6.8 Hz, 2H), 2.60 (s, 2H), 2.56 (t, *J* = 7.2 Hz, 2H), 2.46 (t, *J* = 7.6 Hz, 2H), 1.72 (m, 4H); <sup>13</sup>C NMR (100 MHz, CDCl<sub>3</sub>) δ 171.7, 171.6, 162.7, 162.7, 138.6, 128.5, 127.8, 127.6, 127.3, 73.0, 70.3, 38.8, 33.6, 28.2, 27.1, 21.5; IR (neat): ν<sub>max</sub> = 2923, 2855, 1670, 1628, 1495, 1453, 1429, 1412, 1363, 1299, 1271, 1203, 1099, 1027, 941, 734, 696, 609, 565, 459, 425, 407 cm<sup>–1</sup>; HRMS (ESI): m/z calculated for C<sub>16</sub>H<sub>20</sub>O<sub>3</sub>, [M – H]<sup>–</sup> 259.1340, found, 259.1332.

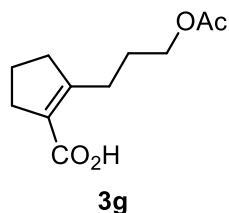

The reaction was conducted according to general experimental procedure noted above, which proceeded at room temperature for 12 hours to give compound **3g** (85 mg, 76% yield) as an amorphous powder. *R<sub>f</sub>* = 0.57 (petroleum ether/ethyl acetate 2/1, v/v, containing 0.5% acetic acid); <sup>1</sup>H NMR (600 MHz, CDCl<sub>3</sub>) δ 4.06 (t, *J* = 6.8 Hz, 2H), 2.66 (m, 4H), 2.53 (t, *J* = 7.6 Hz, 2H), 2.04 (s, 3H), 1.82 (m, 4H); <sup>13</sup>C NMR (100 MHz, CDCl<sub>3</sub>) δ 171.5, 171.3, 161.7, 127.8, 64.3, 38.7, 33.5, 27.0, 26.7, 21.5, 21.1; IR (neat): ν<sub>max</sub> = 2955, 1738, 1716, 1672, 1631, 1431, 1389, 1366, 1236, 1117, 1042, 967, 944, 748, 633, 606, 566, 408 cm<sup>–1</sup>; HRMS (ESI): m/z calculated

for  $C_{11}H_{16}O_2$ ,  $[M - H]^-$  211.0976, found, 211.0970.

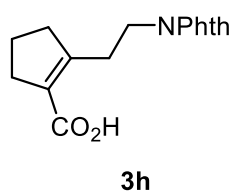

The reaction was conducted according to general experimental procedure noted above, which proceeded at room temperature for 12 hours to give compound **3h** (115 mg, 70% yield) as an amorphous powder.  $R_f = 0.47$  (petroleum ether/ethyl acetate 2/1, v/v, containing 0.5% acetic acid);  $^1H$  NMR (400 MHz,  $CDCl_3$ )  $\delta$  7.82 (m, 2H), 7.69 (m, 2H), 3.87 (t,  $J = 6.8$  Hz, 2H), 2.95 (t,  $J = 6.8$  Hz, 2H), 2.67 – 2.52 (m, 4H), 1.84 (m, 2H);  $^{13}C$  NMR (100 MHz,  $CDCl_3$ )  $\delta$  170.0, 168.3, 158.0, 132.2, 129.6, 129.6, 123.3, 38.8, 36.1, 33.6, 29.3, 21.7; IR (neat):  $\nu_{max} = 1770, 1705, 1668, 1441, 1406, 1371, 1278, 1100, 1030, 715, 531, 421$ ; HRMS (ESI):  $m/z$  calculated for  $C_{16}H_{14}NO_4$ ,  $[M - H]^-$  284.0928, found, 284.0920.

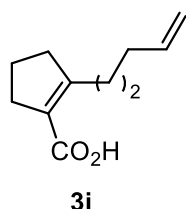

The reaction was conducted according to general experimental procedure noted above, which proceeded at room temperature for 12 hours to give compound **3i** (66 mg, 70% yield) as an amorphous powder.  $R_f = 0.62$  (petroleum ether/ethyl acetate 2:1, v/v, containing 0.5% acetic acid);  $^1H$  NMR (400 MHz,  $CDCl_3$ )  $\delta$  5.82 (m, 1H), 5.09 – 4.90 (m, 2H), 2.64 (m, 4H), 2.53 (t,  $J = 7.6$  Hz, 2H), 2.12 – 2.03 (m, 2H), 1.83 (m, 2H), 1.63 – 1.50 (m, 2H);  $^{13}C$  NMR (100 MHz,  $CDCl_3$ )  $\delta$  171.3, 163.0, 138.5, 126.8, 114.7, 38.6, 33.8, 33.5, 29.8, 27.3, 21.4; IR (neat):  $\nu_{max} = 2925, 2856, 1674, 1631, 1430, 1413, 1343, 1270, 1115, 992, 910, 748, 565, 420, 407\text{ cm}^{-1}$ ; HRMS (ESI):  $m/z$  calculated for  $C_{11}H_{16}O_2$ ,  $[M - H]^-$  179.1078, found, 179.1070.

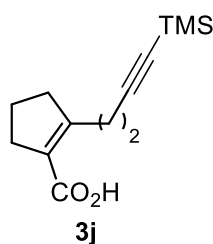

The reaction was conducted according to general experimental procedure noted above, which proceeded at room temperature for 12 hours to give compound **3j** (79 mg, 63% yield) as an amorphous powder.  $R_f = 0.75$  (petroleum ether/ethyl acetate 2:1, v/v, containing 0.5% acetic acid);  $^1H$  NMR (400 MHz,  $CDCl_3$ )  $\delta$  2.81 (t,  $J = 7.2$  Hz, 2H), 2.72 – 2.58 (m, 4H), 2.42 (t,  $J = 7.2$  Hz, 2H), 1.85 (m, 2H), 0.13 (s, 9H);  $^{13}C$  NMR (100 MHz,  $CDCl_3$ )  $\delta$  171.4, 161.3, 128.1, 106.7, 85.3, 39.3, 33.5, 29.2, 21.5, 18.8, 0.2; IR (neat):  $\nu_{max} = 2957, 2611, 2177, 1675, 1629, 1432, 1410, 1346, 1298, 1274, 1248, 1116, 1044, 942, 838, 760, 699, 638, 562, 513, 440, 406\text{ cm}^{-1}$ ; HRMS (ESI):  $m/z$  calculated for  $C_{13}H_{20}O_2Si$ ,  $[M - H]^-$  235.1160, found, 235.1152.

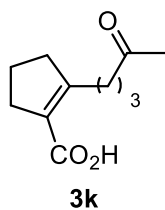

The reaction was conducted according to general experimental procedure noted above, which proceeded at room temperature for 12 hours to give compound **3k** (59 mg, 57% yield) as an amorphous powder.  $R_f = 0.47$  (petroleum ether/ethyl acetate 2/1, v/v, containing 0.5% acetic acid);  $^1\text{H}$  NMR (400 MHz,  $\text{CDCl}_3$ )  $\delta$  2.62 (q,  $J = 8.4$  Hz, 4H), 2.53 (t,  $J = 7.6$  Hz, 2H), 2.45 (t,  $J = 7.6$  Hz, 2H), 2.13 (s, 3H), 1.79 (m, 4H);  $^{13}\text{C}$  NMR (100 MHz,  $\text{CDCl}_3$ )  $\delta$  209.0, 171.5, 162.4, 127.6, 43.3, 38.6, 33.5, 30.1, 29.4, 22.0, 21.5; IR (neat):  $\nu_{\text{max}} = 2948, 2156, 1708, 1671, 1628, 1410, 1356, 1272, 1189, 1115, 1062, 940, 776, 745, 565, 430, 406$ ; HRMS (ESI):  $m/z$  calculated for  $\text{C}_{11}\text{H}_{16}\text{O}_2$ ,  $[\text{M} - \text{H}]^-$  195.1027, found, 195.1019.

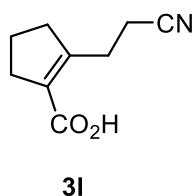

The reaction was conducted according to general experimental procedure noted above, which proceeded at room temperature for 12 hours to give compound **3l** (80 mg, 91% yield) as an amorphous powder.  $R_f = 0.6$  (petroleum ether/ethyl acetate 2/1, v/v, containing 0.5% acetic acid);  $^1\text{H}$  NMR (400 MHz,  $\text{CDCl}_3$ )  $\delta$  2.94 (t,  $J = 7.2$  Hz, 2H), 2.67 (m, 4H), 2.56 (t,  $J = 7.2$  Hz, 2H), 1.91 (m, 2H);  $^{13}\text{C}$  NMR (100 MHz,  $\text{CDCl}_3$ )  $\delta$  170.8, 158.0, 130.0, 119.3, 38.9, 33.3, 25.8, 21.3, 15.9; IR (neat):  $\nu_{\text{max}} = 2961, 2918, 2869, 2611, 2245, 1804, 1669, 1632, 1436, 1413, 1354, 1342, 1296, 1272, 1223, 1137, 1119, 1042, 944, 774, 760, 705, 555, 469, 430, 407$   $\text{cm}^{-1}$ ; HRMS (ESI):  $m/z$  calculated for  $\text{C}_{11}\text{H}_{16}\text{O}_2$ ,  $[\text{M} - \text{H}]^-$  179.1078, found, 179.1071.

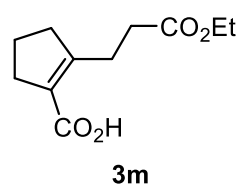

The reaction was conducted according to general experimental procedure noted above, which proceeded at room temperature for 12 hours to give compound **3m** (90 mg, 80% yield) as an amorphous powder.  $R_f = 0.58$  (petroleum ether/ethyl acetate 2/1, v/v, containing 0.5% acetic acid);  $^1\text{H}$  NMR (400 MHz,  $\text{CDCl}_3$ )  $\delta$  4.13 (q,  $J = 7.2$  Hz, 1H), 2.90 (t,  $J = 8.0$  Hz, 1H), 2.64 (t,  $J = 7.6$  Hz, 1H), 2.51 (m, 2H), 1.84 (p,  $J = 7.6$  Hz, 1H), 1.25 (t,  $J = 7.2$  Hz, 2H);  $^{13}\text{C}$  NMR (100 MHz,  $\text{CDCl}_3$ )  $\delta$  173.1, 170.7, 160.1, 128.2, 60.6, 38.4, 33.4, 32.5, 25.4, 21.4, 14.2; IR (neat):  $\nu_{\text{max}} = 2959, 1733, 1676, 1633, 1431, 1373, 1348, 1274, 1179, 1049, 1030, 943, 860, 784, 747, 544, 418$   $\text{cm}^{-1}$ ; HRMS (ESI):  $m/z$  calculated for  $\text{C}_{11}\text{H}_{16}\text{O}_4$ ,  $[\text{M} - \text{H}]^-$  211.0976, found, 211.0970.

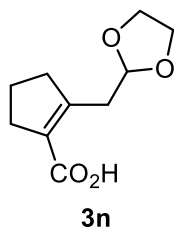

The reaction was conducted according to general experimental procedure noted above, which proceeded at room temperature for 12 hours to give compound **3n** (58 mg, 56% yield) as an amorphous powder.  $R_f = 0.57$  (petroleum ether/ethyl acetate 2/1, v/v, containing 0.5% acetic acid);  $^1\text{H}$  NMR (400 MHz,  $\text{CDCl}_3$ )  $\delta$  5.07 (t,  $J = 5.2$  Hz, 1H), 4.06 – 3.93 (m, 2H), 3.91 – 3.81 (m, 2H), 2.97 (d,  $J = 4.8$  Hz, 2H), 2.65 (m, 6H), 1.86 (p,  $J = 7.6$  Hz, 2H);  $^{13}\text{C}$  NMR (100 MHz,  $\text{CDCl}_3$ )  $\delta$  170.6, 155.7, 129.9, 103.3, 65.0, 39.7, 35.2, 33.6, 21.6; IR (neat):  $\nu_{\text{max}} = 2887, 1674, 1634, 1427, 1277, 1126, 1040, 942, 827, 748, 566, 408$ ; HRMS (ESI):  $m/z$  calculated for  $\text{C}_{10}\text{H}_{14}\text{O}_4$ ,  $[\text{M} - \text{H}]^-$  197.0819, found, 197.0815.

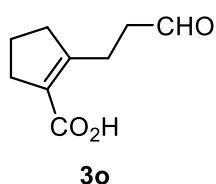

The reaction was conducted according to general experimental procedure noted above, which proceeded at room temperature for 12 hours to give compound **3o** (110 mg, 70% yield) as an amorphous powder.  $R_f = 0.56$  (petroleum ether/ethyl acetate 2/1, v/v, containing 0.5% acetic acid);  $^1\text{H}$  NMR (400 MHz,  $\text{CDCl}_3$ )  $\delta$  9.78 (s, 1H), 2.91 (t,  $J = 7.2$  Hz, 2H), 2.61 (M, 4H), 2.53 (t,  $J = 7.2$  Hz, 2H), 1.84 (M, 2H);  $^{13}\text{C}$  NMR (100 MHz,  $\text{CDCl}_3$ )  $\delta$  201.8, 171.4, 160.7, 128.3, 42.1, 38.8, 33.4, 23.0, 21.4; IR (neat):  $\nu_{\text{max}} = 2948, 2932, 1677, 1633, 1434, 1388, 1300, 1193, 1125, 1059, 961, 444\text{ cm}^{-1}$ ; HRMS (ESI):  $m/z$  calculated for  $\text{C}_9\text{H}_{12}\text{O}_3$ ,  $[\text{M} - \text{H}]^-$  167.0714, found, 167.0706.

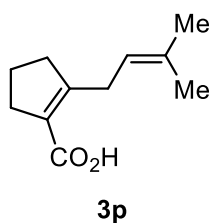

The reaction was conducted according to general experimental procedure noted above, which proceeded at room temperature for 12 hours to give compound **3p** (66 mg, 760% yield) as an amorphous powder.  $R_f = 0.63$  (petroleum ether/ethyl acetate 2/1, v/v, containing 0.5% acetic acid);  $^1\text{H}$  NMR (400 MHz,  $\text{CDCl}_3$ )  $\delta$  5.14 (t,  $J = 7.6$  Hz, 1H), 3.33 (d,  $J = 7.2$  Hz, 2H), 2.64 (t,  $J = 7.2$  Hz, 2H), 2.51 (t,  $J = 7.6$  Hz, 2H), 1.81 (m, 2H), 1.68 (d,  $J = 15.6$  Hz, 6H);  $^{13}\text{C}$  NMR (100 MHz,  $\text{CDCl}_3$ )  $\delta$  170.7, 162.0, 133.5, 126.0, 120.2, 38.4, 33.4, 29.7, 29.4, 25.7, 21.3, 17.9; IR (neat):  $\nu_{\text{max}} = 2926, 2858, 2609, 1674, 1629, 1430, 1414, 1345, 1268, 1203, 1116, 992, 909, 745, 636, 554, 433, 408\text{ cm}^{-1}$ ; HRMS (ESI):  $m/z$  calculated for  $\text{C}_{11}\text{H}_{16}\text{O}_2$ ,  $[\text{M} - \text{H}]^-$  179.1078, found, 179.1071.

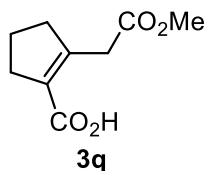

The reaction was conducted according to general experimental procedure noted above, which proceeded at room temperature for 12 hours to give compound **3q** (67 mg, 70% yield) as an amorphous powder.  $R_f = 0.64$  (petroleum ether/ethyl acetate 2/1, v/v, containing 0.5% acetic acid);  $^1\text{H}$  NMR (600 MHz,  $\text{CDCl}_3$ )  $\delta$  4.71 (s, 2H), 3.82 – 3.76 (m, 3H), 2.87 – 2.81 (m, 2H), 2.74 – 2.68 (m, 2H), 2.00 (p,  $J = 7.8$  Hz, 2H);  $^{13}\text{C}$  NMR (150 MHz,  $\text{CDCl}_3$ )  $\delta$  168.3, 163.2, 135.0, 131.0, 60.6, 52.4, 43.4, 33.0, 21.8; IR (neat):  $\nu_{\text{max}} = 2955, 2852, 1763, 1728, 1620, 1436, 1380, 1331, 1259, 1219, 1134, 1086, 1033, 975, 892, 775, 702, 641, 570, 455, 404\text{ cm}^{-1}$ ; HRMS (ESI):  $m/z$  calculated for  $\text{C}_{11}\text{H}_{16}\text{O}_2$ ,  $[\text{M} - \text{H}]^-$  183.0663, found, 183.0667.

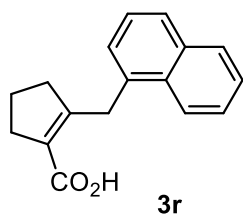

The reaction was conducted according to general experimental procedure noted above, which proceeded at room temperature for 12 hours to give compound **3r** (26 mg, 20% yield) as an amorphous powder.  $R_f = 0.37$  (petroleum ether/ethyl acetate 2/1, v/v, containing 0.5% acetic acid);  $^1\text{H}$  NMR (400 MHz,  $\text{CDCl}_3$ )  $\delta$  8.13 – 8.03 (m, 1H), 7.85 (dd,  $J = 7.2, 2.2$  Hz, 1H), 7.75 (d,  $J = 8.1$  Hz, 1H), 7.55 – 7.31 (m, 4H), 4.49 (s, 2H), 2.78 – 2.66 (m, 2H), 2.28 (t,  $J = 8.0$  Hz, 2H), 1.74 (p,  $J = 7.6$  Hz, 2H);  $^{13}\text{C}$  NMR (100 MHz,  $\text{CDCl}_3$ )  $\delta$  171.4, 161.4, 135.3, 133.9, 132.5, 128.8, 127.7, 127.3, 127.0, 126.2, 125.8, 125.6, 124.1, 38.4, 34.1, 33.7, 21.3, 0.1; IR (neat):  $\nu_{\text{max}} = 2924, 1672, 1629, 1597, 1510, 1428, 1344, 1276, 1221, 1199, 1018, 942, 776, 688, 556, 528, 413\text{ cm}^{-1}$ ; HRMS (ESI):  $m/z$  calculated for  $\text{C}_{11}\text{H}_{16}\text{O}_2$ ,  $[\text{M} - \text{H}]^-$  251.1078, found, 251.1074.

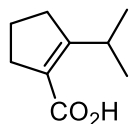

The reaction was conducted according to general experimental procedure noted above, which proceeded at room temperature for 12 hours to give compound **3s** (66 mg, 82% yield) as an amorphous powder.  $R_f = 0.64$  (petroleum ether/ethyl acetate 2/1, v/v, containing 0.5% acetic acid);  $^1\text{H}$  NMR (400 MHz,  $\text{CDCl}_3$ )  $\delta$  3.72 (m, 1H), 2.62 (m, 2H), 2.51 (m, 2H), 1.80 (p,  $J = 7.6$  Hz, 2H), 1.03 (d,  $J = 7.0$  Hz, 6H);  $^{13}\text{C}$  NMR (100 MHz,  $\text{CDCl}_3$ )  $\delta$  171.4, 161.3, 128.1, 106.7, 85.3, 39.3, 33.5, 29.2, 21.5, 18.8, 0.2; HRMS (ESI):  $m/z$  calculated for  $\text{C}_9\text{H}_{14}\text{O}_2$ ,  $[\text{M} - \text{H}]^-$  153.0921, found, 153.0915.

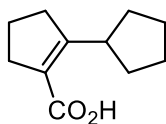

**3t**

The reaction was conducted according to general experimental procedure noted above, which proceeded at room temperature for 12 hours to give compound **3t** (65 mg, 69% yield) as an amorphous powder.  $R_f = 0.71$  (petroleum ether/ethyl acetate 2/1, v/v, containing 0.5% acetic acid);  $^1\text{H}$  NMR (400 MHz,  $\text{CDCl}_3$ )  $\delta$  3.78 (m, 1H), 2.63 (t,  $J = 7.6$  Hz, 2H), 2.52 (t,  $J = 7.6$  Hz, 2H), 1.81 (m, 4H), 1.72 – 1.56 (m, 4H), 1.46 – 1.31 (m, 2H).  $^{13}\text{C}$  NMR (100 MHz,  $\text{CDCl}_3$ )  $\delta$  172.2, 166.6, 126.5, 39.8, 34.4, 33.6, 26.0, 21.7; IR (neat):  $\nu_{\text{max}} = 2949, 2865, 1668, 1622, 1409, 1347, 1300, 1265, 1206, 1137, 953, 731, 568, 500, 416\text{ cm}^{-1}$ ; HRMS (ESI):  $m/z$  calculated for  $\text{C}_{11}\text{H}_{16}\text{O}_2$ ,  $[\text{M} - \text{H}]^-$  179.1078, found, 179.1071.

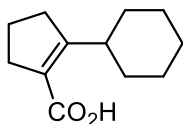

**3u**

The reaction was conducted according to general experimental procedure noted above, which proceeded at room temperature for 12 hours to give compound **3u** (51 mg, 50% yield) as an amorphous powder.  $R_f = 0.72$  (petroleum ether/ethyl acetate 2/1, v/v, containing 0.5% acetic acid);  $^1\text{H}$  NMR (400 MHz,  $\text{CDCl}_3$ )  $\delta$  12.49 (s, 1H), 3.38 (m, 1H), 2.70 – 2.57 (m, 2H), 2.55 – 2.46 (m, 2H), 1.86 – 1.58 (m, 7H), 1.43 – 1.13 (m, 5H);  $^{13}\text{C}$  NMR (100 MHz,  $\text{CDCl}_3$ )  $\delta$  172.2, 168.1, 125.4, 38.7, 34.7, 33.5, 31.3, 26.3, 26.3, 21.6; IR (neat):  $\nu_{\text{max}} = 2919, 2852, 1669, 1623, 1439, 1409, 1346, 1302, 1279, 937, 756, 566, 460, 406\text{ cm}^{-1}$ ; HRMS (ESI):  $m/z$  calculated for  $\text{C}_{12}\text{H}_{18}\text{O}_2$ ,  $[\text{M} - \text{H}]^-$  193.1234, found, 193.1226

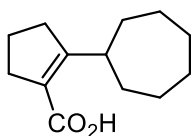

**3v**

The reaction was conducted according to general experimental procedure noted above, which proceeded at room temperature for 12 hours to give compound **3v** (60 mg, 55% yield) as an amorphous powder.  $R_f = 0.6$  (petroleum ether/ethyl acetate 2/1, v/v, containing 0.5% acetic acid);  $^1\text{H}$  NMR (400 MHz,  $\text{CDCl}_3$ )  $\delta$  3.56 (m, 1H), 2.60 (t,  $J = 7.6$  Hz, 2H), 2.52 (t,  $J = 7.6$  Hz, 2H), 1.78 (m, 2H), 1.73 – 1.58 (m, 6H), 1.51 (m, 4H), 1.41 (m, 2H);  $^{13}\text{C}$  NMR (100 MHz,  $\text{CDCl}_3$ )  $\delta$  171.7, 168.8, 124.0, 39.8, 34.3, 33.2, 33.1, 28.2, 27.3, 21.7; IR (neat):  $\nu_{\text{max}} = 2916, 2852, 1668, 1620, 1440, 1408, 1344, 1301, 1280, 1199, 1135, 933, 825, 755, 736, 564, 425\text{ cm}^{-1}$ ; HRMS (ESI):  $m/z$  calculated for  $\text{C}_{13}\text{H}_{20}\text{O}_2$ ,  $[\text{M} - \text{H}]^-$  207.1391, found, 207.1385.

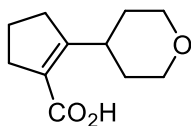

**3w**

The reaction was conducted according to general experimental procedure noted above, which proceeded at room temperature for 12 hours to give compound **3w** (67 mg, 75% yield) as an amorphous powder.  $R_f = 0.57$  (petroleum ether/ethyl acetate 2/1, v/v, containing 0.5% acetic acid);  $^1\text{H}$  NMR (400 MHz,  $\text{CDCl}_3$ )  $\delta$  3.99 (dd,  $J = 11.2, 4.0$  Hz, 2H), 3.65 (m, 1H), 3.54 – 3.44 (m, 2H), 2.69 – 2.59 (m, 2H), 2.53 (t,  $J = 7.6$  Hz, 2H), 1.82 (m, 2H), 1.65 (m, 2H), 1.57 – 1.47 (m, 2H);  $^{13}\text{C}$  NMR (100 MHz,  $\text{CDCl}_3$ )  $\delta$  171.4, 165.4, 126.6, 68.0, 35.8, 34.8, 33.6, 30.7, 21.5; IR (neat):  $\nu_{\text{max}} = 2956, 2920, 2851, 1661, 1620, 1437, 1410, 1387, 1351, 1305, 1257, 1118, 1080, 1009, 984, 877, 822, 725, 570, 549, 462, 421\text{ cm}^{-1}$ ; HRMS (ESI):  $m/z$  calculated for  $\text{C}_{11}\text{H}_{16}\text{O}_3$ ,  $[\text{M} - \text{H}]^-$  195.1027, found, 195.1021.

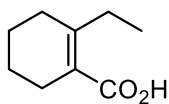

**3x**

The reaction was conducted according to general experimental procedure noted above, which proceeded at room temperature for 12 hours to give compound **3x** (64 mg, 85% yield) as an amorphous powder.  $R_f = 0.65$  (petroleum ether/ethyl acetate 2/1, v/v, containing 0.5% acetic acid);  $^1\text{H}$  NMR (400 MHz,  $\text{CDCl}_3$ )  $\delta$  2.45 (q,  $J = 7.6$  Hz, 2H), 2.30 (m, 2H), 2.18 (m, 2H), 1.61 (p,  $J = 3.2$  Hz, 4H), 1.06 (t,  $J = 7.6$  Hz, 3H);  $^{13}\text{C}$  NMR (100 MHz,  $\text{CDCl}_3$ )  $\delta$  174.6, 155.7, 123.0, 31.6, 28.9, 26.4, 22.5, 22.4, 13.3; IR (neat):  $\nu_{\text{max}} = 3051, 2934, 2857, 2627, 1676, 1619, 1455, 1404, 1285, 1263, 1247, 1180, 1088, 1044, 936, 875, 855, 828, 788, 739, 636, 531\text{ cm}^{-1}$ ; HRMS (ESI):  $m/z$  calculated for  $\text{C}_9\text{H}_{14}\text{O}_2$   $[\text{M} - \text{H}]^-$  153.0921, found, 153.0914.

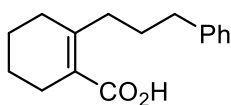

**3y**

The reaction was conducted according to general experimental procedure noted above, which proceeded at room temperature for 12 hours to give compound **3y** (107 mg, 90% yield) as an amorphous powder.  $R_f = 0.74$  (petroleum ether/ethyl acetate 2/1, v/v, containing 0.5% acetic acid);  $^1\text{H}$  NMR (400 MHz,  $\text{CDCl}_3$ )  $\delta$  7.33 – 7.10 (m, 5H), 2.65 (t,  $J = 7.6$  Hz, 2H), 2.50 (t,  $J = 7.6$  Hz, 2H), 2.32 (m, 2H), 2.15 (m, 2H), 1.79 (m, 2H), 1.59 (s, 4H);  $^{13}\text{C}$  NMR (100 MHz,  $\text{CDCl}_3$ )  $\delta$  174.4, 153.8, 142.5, 128.5, 128.4, 125.8, 36.2, 35.6, 32.2, 30.5, 26.5, 22.5, 22.4; HRMS (ESI):  $m/z$  calculated for  $\text{C}_{16}\text{H}_{20}\text{O}_2$ ,  $[\text{M} - \text{H}]^-$  243.1391, found, 243.1384.

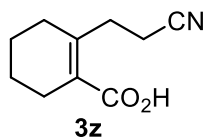

The reaction was conducted according to general experimental procedure noted above, which proceeded at room temperature for 12 hours to give compound **3z** (75 mg, 86% yield) as an amorphous powder.  $R_f = 0.38$  (petroleum ether/ethyl acetate 2/1, v/v, containing 0.5% acetic acid);  $^1\text{H}$  NMR (400 MHz,  $\text{CDCl}_3$ )  $\delta$  2.76 (t,  $J = 7.6$  Hz, 2H), 2.57 (t,  $J = 7.2$  Hz, 2H), 2.33 (p,  $J = 4.0$  Hz, 2H), 2.28 (m, 2H), 1.64 (m, 4H);  $^{13}\text{C}$  NMR (100 MHz,  $\text{CDCl}_3$ )  $\delta$  173.3, 150.6, 126.5, 119.6, 32.9, 31.4, 26.2, 22.0, 21.9, 16.3; IR (neat):  $\nu_{\text{max}} = 2939, 2869, 2614, 2243, 2154, 2012, 1666, 1624, 1451, 1404, 1343, 1285, 1264, 1188, 1160, 1138, 1079, 1049, 946, 901, 882, 823, 763, 737, 704, 666, 551, 506, 454, 433\text{ cm}^{-1}$ ; HRMS (ESI):  $m/z$  calculated for  $\text{C}_{10}\text{H}_{13}\text{NO}_2$ ,  $[\text{M} - \text{H}]^-$  178.0874, found, 178.0863.

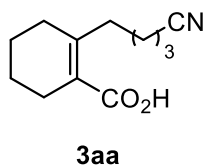

The reaction was conducted according to general experimental procedure noted above, which proceeded at room temperature for 12 hours to give compound **3aa** (85 mg, 84% yield) as an amorphous powder.  $R_f = 0.41$  (petroleum ether/ethyl acetate 2/1, v/v, containing 0.5% acetic acid);  $^1\text{H}$  NMR (600 MHz,  $\text{CDCl}_3$ )  $\delta$  2.49 – 2.44 (m, 2H), 2.37 (t,  $J = 7.2$  Hz, 2H), 2.31 (s, 2H), 2.18 (s, 2H), 1.73 – 1.67 (m, 2H), 1.63 (m, 6H);  $^{13}\text{C}$  NMR (100 MHz,  $\text{CDCl}_3$ )  $\delta$  173.8, 153.0, 124.3, 119.9, 77.5, 77.2, 76.8, 34.7, 32.2, 27.6, 26.5, 25.5, 22.4, 22.3, 17.1; IR (neat):  $\nu_{\text{max}} = 2931, 2861, 2628, 2247, 1675, 1622, 1450, 1421, 1282, 1256, 1179, 1135, 1111, 1079, 938, 771, 741, 659, 538, 407\text{ cm}^{-1}$ ; HRMS (ESI):  $m/z$  calculated for  $\text{C}_{12}\text{H}_{17}\text{NO}_2$ ,  $[\text{M} - \text{H}]^-$  206.1187, found, 206.1200.

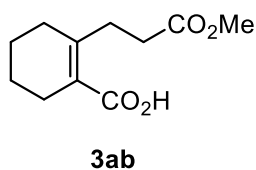

The reaction was conducted according to general experimental procedure noted above, which proceeded at room temperature for 12 hours to give compound **3ab** (80 mg, 77% yield) as an amorphous powder.  $R_f = 0.66$  (petroleum ether/ethyl acetate 2/1, v/v, containing 0.5% acetic acid);  $^1\text{H}$  NMR (600 MHz,  $\text{CDCl}_3$ )  $\delta$  3.68 (s, 3H), 2.71 (t,  $J = 5.2$  Hz, 2H), 2.51 (t,  $J = 5.2$  Hz, 1H), 2.31 (m, 2H), 2.19 – 2.13 (m, 2H), 1.61 (s, 4H);  $^{13}\text{C}$  NMR (100 MHz,  $\text{CDCl}_3$ )  $\delta$  174.0, 173.1, 150.3, 125.4, 51.7, 32.7, 31.6, 30.8, 26.4, 22.1; IR (neat):  $\nu_{\text{max}} = 2933, 2861, 2632, 1737, 1679, 1626, 1436, 1368, 1260, 1194, 1172, 1074, 1047, 970, 948, 876, 785, 732, 709, 641, 465\text{ cm}^{-1}$ ; HRMS (ESI):  $m/z$  calculated for  $\text{C}_{11}\text{H}_{16}\text{O}_4$ ,  $[\text{M} - \text{H}]^-$  211.0976, found, 211.0969.

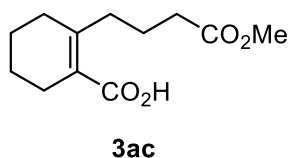

The reaction was conducted according to general experimental procedure noted above, which proceeded at room temperature for 12 hours to give compound **3ac** (84 mg, 72% yield) as an amorphous powder.  $R_f = 0.6$  (petroleum ether/ethyl acetate 2/1, v/v, containing 0.5% acetic acid);  $^1\text{H}$  NMR (400 MHz,  $\text{CDCl}_3$ )  $\delta$  3.67 (s, 3H), 2.47 (t,  $J = 8.0$  Hz, 2H), 2.39 – 2.27 (m, 4H), 2.22 – 2.13 (m, 2H), 1.80 (p,  $J = 7.6$  Hz, 2H), 1.60 (p,  $J = 3.2$  Hz, 4H);  $^{13}\text{C}$  NMR (100 MHz,  $\text{CDCl}_3$ )  $\delta$  174.2, 173.7, 152.8, 124.3, 51.6, 34.9, 34.0, 32.0, 26.5, 23.9, 22.4, 22.3; IR (neat):  $\nu_{\text{max}} = 2933, 2860, 2630, 1737, 1680, 1625, 1637, 1369, 1282, 1258, 1196, 1175, 1142, 1078, 1025, 941, 742, 547\text{ cm}^{-1}$ ; HRMS (ESI):  $m/z$  calculated for  $\text{C}_{12}\text{H}_{18}\text{O}_4$ ,  $[\text{M} - \text{H}]^-$  225.1132, found, 225.1124.

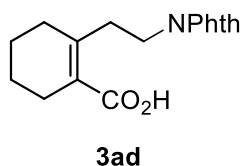

The reaction was conducted according to general experimental procedure noted above, which proceeded at room temperature for 12 hours to give compound **3ad** (104 mg, 71% yield) as an amorphous powder.  $R_f = 0.23$  (petroleum ether/ethyl acetate 2/1, v/v, containing 0.5% acetic acid);  $^1\text{H}$  NMR (400 MHz,  $\text{CDCl}_3$ )  $\delta$  7.81 (m, 2H), 7.68 (m, 2H), 3.86 (t,  $J = 6.8$  Hz, 2H), 2.78 (t,  $J = 6.8$  Hz, 2H), 2.29 – 2.18 (m, 4H), 1.62 (s, 4H);  $^{13}\text{C}$  NMR (100 MHz,  $\text{CDCl}_3$ )  $\delta$  172.5, 168.3, 148.1, 133.7, 132.2, 126.5, 123.1, 36.4, 34.3, 31.9, 26.5, 22.1, 22.0; IR (neat):  $\nu_{\text{max}} = 2933, 1771, 1709, 1467, 1437, 1395, 1360, 1282, 1264, 1188, 1099, 1039, 1006, 940, 873, 794, 718, 530, 407\text{ cm}^{-1}$ ; HRMS (ESI):  $m/z$  calculated for  $\text{C}_{17}\text{H}_{17}\text{NO}_4$ ,  $[\text{M} - \text{H}]^-$  298.1085, found, 225.1124.

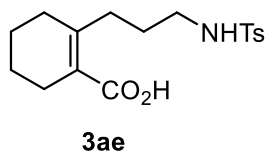

The reaction was conducted according to general experimental procedure noted above, which proceeded at room temperature for 12 hours to give compound **3ae** (98 mg, 60% yield) as an amorphous powder.  $R_f = 0.6$  (petroleum ether/ethyl acetate 2/1, v/v, containing 0.5% acetic acid);  $^1\text{H}$  NMR (400 MHz,  $\text{CDCl}_3$ )  $\delta$  7.86 – 7.55 (m, 2H), 7.27 (m, 3H), 5.56 (s, 1H), 3.11 – 2.72 (m, 2H), 2.42 (m, 5H), 2.27 (s, 2H), 2.08 (s, 2H), 1.67 (m, 2H), 1.56 (s, 4H);  $^{13}\text{C}$  NMR (100 MHz,  $\text{CDCl}_3$ )  $\delta$  174.2, 152.7, 143.2, 137.2, 129.7, 127.2, 124.6, 42.5, 32.3, 31.8, 27.8, 26.4, 22.3, 22.1, 21.6; IR (neat):  $\nu_{\text{max}} = 3271, 2929, 2859, 1674, 1623, 1598, 1495, 1419, 1322, 1304,$

1286, 1262, 1212, 1182, 1153, 1092, 1019, 943, 908, 813, 730, 706, 661, 569, 549  $\text{cm}^{-1}$ ;  
 HRMS (ESI):  $m/z$  calculated for  $\text{C}_{17}\text{H}_{23}\text{NO}_4\text{S}$ ,  $[\text{M} - \text{H}]^-$  336.1275, found, 336.1264.

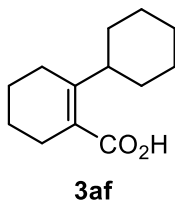

The reaction was conducted according to general experimental procedure noted above, which proceeded at room temperature for 12 hours to give compound **3af** (48mg, 47% yield) as an amorphous powder.  $^1\text{H}$  NMR (400 MHz,  $\text{CDCl}_3$ )  $\delta$  3.12 (t,  $J = 9.3$  Hz, 1H), 2.31 (s, 2H), 2.12 (s, 2H), 1.79 – 1.53 (m, 8H), 1.41 – 0.91 (m, 6H);  $^{13}\text{C}$  NMR (100 MHz,  $\text{CDCl}_3$ )  $\delta$  174.6, 155.4, 122.9, 42.5, 31.1, 27.0, 26.6, 26.4, 26.1, 22.4, 22.4; IR (neat):  $\nu_{\text{max}} = 2923, 2852, 2620, 1679, 1611, 1449, 1404, 1281, 1259, 1242, 1136, 1043, 988, 939, 744, 689, 561, 513, 478, 407$   $\text{cm}^{-1}$ ; HRMS (ESI):  $m/z$  calculated for  $\text{C}_{13}\text{H}_{20}\text{O}_2$ ,  $[\text{M} - \text{H}]^-$  207.1391, found, 207.1384.

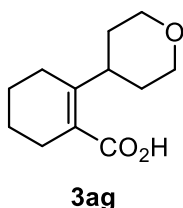

The reaction was conducted according to general experimental procedure noted above, which proceeded at room temperature for 12 hours to give compound **3ag** (65 mg, 63% yield) as an amorphous powder.  $R_f = 0.54$  (petroleum ether/ethyl acetate 2/1, v/v, containing 0.5% acetic acid);  $^1\text{H}$  NMR (400 MHz,  $\text{CDCl}_3$ )  $\delta$  3.99 (dd,  $J = 11.2, 4.4$  Hz, 2H), 3.59 – 3.33 (m, 3H), 2.32 (m, 2H), 2.18 – 2.08 (m, 2H), 1.71 (m, 2H), 1.60 (4, 2H), 1.47 (m, 2H);  $^{13}\text{C}$  NMR (100 MHz,  $\text{CDCl}_3$ )  $\delta$  174.4, 153.3, 124.2, 68.1, 39.5, 30.4, 26.8, 26.2, 22.1; IR (neat):  $\nu_{\text{max}} = 2946, 2927, 2856, 1680, 1627, 1442, 1419, 1390, 1362, 1284, 1259, 1239, 1205, 1141, 1116, 1041, 1005, 981, 964, 905, 847, 826, 814, 752, 703, 611, 561, 510, 462, 485$   $\text{cm}^{-1}$ ; HRMS (ESI):  $m/z$  calculated for  $\text{C}_{12}\text{H}_{18}\text{O}_3$ ,  $[\text{M} - \text{H}]^-$  209.1183, found, 209.1175.

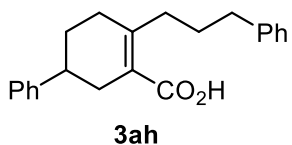

The reaction was conducted according to general experimental procedure noted above, which proceeded at room temperature for 12 hours to give compound **3ah** (99 mg, 87% yield) as an amorphous powder.  $R_f = 0.65$  (petroleum ether/ethyl acetate 2/1, v/v, containing 0.5% acetic acid);  $^1\text{H}$  NMR (400 MHz,  $\text{CDCl}_3$ )  $\delta$  7.24 (m, 10H), 2.82 – 2.56 (m, 5H), 2.49 (m, 1H), 2.35 (m, 3H), 2.01 – 1.65 (m, 4H);  $^{13}\text{C}$  NMR 100 MHz,  $\text{CDCl}_3$ )  $\delta$  173.9, 153.7, 146.1, 142.4, 128.6, 128.5, 128.4, 127.0, 126.4, 125.9, 123.5, 39.8, 36.2, 35.2, 34.4, 32.8, 30.5, 29.3; IR (neat):  $\nu_{\text{max}} =$

3024, 2924, 2858, 2607, 1681, 1661, 1620, 1495, 1454, 1421, 1400, 1283, 1260, 1156, 1078, 1030, 944, 908, 751, 699, 586, 525, 489, 457, 412, 404  $\text{cm}^{-1}$ ; HRMS (ESI):  $m/z$  calculated for  $\text{C}_{22}\text{H}_{24}\text{O}_2$ ,  $[\text{M} - \text{H}]^-$  319.1704, found, 319.1695.

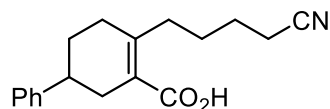

**3ai**

The reaction was conducted according to general experimental procedure noted above, which proceeded at room temperature for 12 hours to give compound **3ai** (82 mg, 80% yield) as an amorphous powder.  $R_f = 0.58$  (petroleum ether/ethyl acetate 2/1, v/v, containing 0.5% acetic acid);  $^1\text{H}$  NMR (400 MHz,  $\text{CDCl}_3$ )  $\delta$  7.32 (m, 2H), 7.26 – 7.17 (m, 3H), 2.76 (m, 2H), 2.59 (m, 1H), 2.54 – 2.46 (m, 1H), 2.46 – 2.31 (m, 5H), 1.98 (m, 1H), 1.71 (m, 5H);  $^{13}\text{C}$  NMR (100 MHz,  $\text{CDCl}_3$ )  $\delta$  173.6, 152.9, 145.8, 128.5, 126.8, 126.3, 123.9, 119.8, 39.7, 34.3, 34.3, 32.8, 29.1, 27.6, 25.4, 16.9; IR (neat):  $\nu_{\text{max}} = 3028, 2926, 2863, 2606, 2246, 1678, 1623, 1494, 1455, 1422, 1281, 1260, 1197, 1073, 1030, 940, 916, 761, 701, 604, 520, 413 \text{ cm}^{-1}$ ; HRMS (ESI):  $m/z$  calculated for  $\text{C}_{18}\text{H}_{21}\text{NO}_2$ ,  $[\text{M} - \text{H}]^-$  282.1500, found, 282.1491.

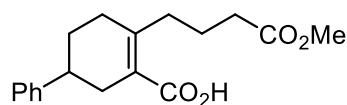

**3aj**

The reaction was conducted according to general experimental procedure noted above, which proceeded at room temperature for 12 hours to give compound **3aj** (90 mg, 84% yield) as an amorphous powder.  $R_f = 0.55$  (petroleum ether/ethyl acetate 2/1, v/v, containing 0.5% acetic acid);  $^1\text{H}$  NMR (400 MHz,  $\text{CDCl}_3$ )  $\delta$  7.31 (t,  $J = 7.6 \text{ Hz}$ , 2H), 7.25 – 7.18 (m, 3H), 3.68 (s, 3H), 2.85 – 2.69 (m, 2H), 2.60 (m, 1H), 2.53 – 2.46 (m, 1H), 2.36 (q,  $J = 10.8, 9.2 \text{ Hz}$ , 5H), 2.01 – 1.69 (m, 4H);  $^{13}\text{C}$  NMR (100 MHz,  $\text{CDCl}_3$ )  $\delta$  174.1, 152.7, 146.0, 128.5, 126.9, 126.4, 124.1, 51.6, 39.8, 34.5, 34.4, 33.9, 32.6, 29.2, 23.9; IR (neat):  $\nu_{\text{max}} = 3024, 2924, 2858, 2607, 1681, 1661, 1620, 1495, 1454, 1421, 1400, 1283, 1260, 1156, 1078, 1030, 944, 908, 751, 699, 586, 525, 489, 457, 412, 404 \text{ cm}^{-1}$ ; HRMS (ESI):  $m/z$  calculated for  $\text{C}_{18}\text{H}_{22}\text{O}_4$ ,  $[\text{M} - \text{H}]^-$  301.1445, found, 301.1436.

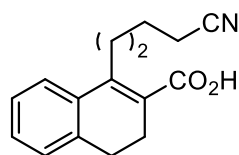

**3ak**

The reaction was conducted according to general experimental procedure noted above, which proceeded at room temperature for 12 hours to give compound **3ak** (64 mg, 64% yield) as an amorphous powder.  $R_f = 0.48$  (petroleum ether/ethyl acetate 2/1, v/v, containing 0.5%

acetic acid);  $^1\text{H}$  NMR (400 MHz,  $\text{CDCl}_3$ )  $\delta$  7.53 – 7.44 (m, 1H), 7.33 – 7.25 (m, 2H), 7.21 (m, 1H), 3.08 (t,  $J$  = 7.6 Hz, 2H), 2.76 (m, 2H), 2.61 (m, 2H), 2.40 (t,  $J$  = 6.8 Hz, 2H), 1.84 – 1.67 (m, 4H);  $^{13}\text{C}$  NMR 100 MHz,  $\text{CDCl}_3$ )  $\delta$  174.0, 148.0, 138.4, 134.0, 129.2, 127.9, 126.8, 125.7, 125.0, 119.8, 28.7, 28.2, 28.1, 25.4, 24.9, 16.9; IR (neat):  $\nu_{\text{max}}$  = 2937, 2882, 2630, 2246, 1671, 1601, 1563, 1451, 1425, 1265, 1214, 1168, 1133, 1030, 942, 846, 767, 736, 562, 493, 431  $\text{cm}^{-1}$ ; HRMS (ESI):  $m/z$  calculated for  $\text{C}_{16}\text{H}_{17}\text{NO}_2$ ,  $[\text{M} - \text{H}]^-$  254.1187, found, 254.1178.

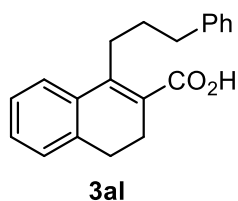

The reaction was conducted according to general experimental procedure noted above, which proceeded at room temperature for 12 hours to give compound **3al** (74 mg, 71% yield) as an amorphous powder.

$R_f$  = 0.71 (petroleum ether/ethyl acetate 2/1, v/v, containing 0.5% acetic acid);  $^1\text{H}$  NMR (400 MHz,  $\text{CDCl}_3$ )  $\delta$  7.43 – 7.18 (m, 9H), 3.15 – 3.06 (m, 2H), 2.83 – 2.74 (m, 4H), 2.64 (m, 2H), 1.94 (m, 2H);  $^{13}\text{C}$  NMR 100 MHz,  $\text{CDCl}_3$ )  $\delta$  174.7, 148.9, 142.2, 138.4, 134.5, 128.9, 128.6, 128.3, 127.7, 126.7, 125.8, 125.3, 125.2, 36.1, 31.3, 29.0, 28.4, 24.9; IR (neat):  $\nu_{\text{max}}$  = 3061, 3024, 2934, 2606, 1668, 1600, 1562, 1495, 1451, 1400, 1338, 1302, 1279, 1263, 1213, 1161, 1134, 1080, 1065, 1029, 906, 843, 767, 729, 697, 648, 621, 600, 561, 543, 483, 427  $\text{cm}^{-1}$ ; HRMS (ESI):  $m/z$  calculated for  $\text{C}_{20}\text{H}_{20}\text{O}_2$ ,  $[\text{M} - \text{H}]^-$  291.1391, found, 291.1384.

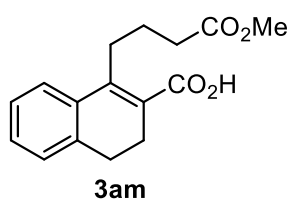

The reaction was conducted according to general experimental procedure noted above, which proceeded at room temperature for 12 hours to give compound **3am** (66 mg, 61% yield) as an amorphous powder.  $R_f$  = 0.6 (petroleum ether/ethyl acetate 2/1, v/v, containing

0.5% acetic acid);  $^1\text{H}$  NMR (400 MHz,  $\text{CDCl}_3$ )  $\delta$  7.57 (dd,  $J$  = 6.8, 2.0 Hz, 1H), 7.32 – 7.24 (m, 2H), 7.22 – 7.17 (m, 1H), 3.68 (s, 3H), 3.08 (t,  $J$  = 8.0 Hz, 2H), 2.76 (dd,  $J$  = 9.2, 6.4 Hz, 2H), 2.60 (dd,  $J$  = 9.2, 6.4 Hz, 2H), 2.44 (t,  $J$  = 7.2 Hz, 2H), 1.90 (p,  $J$  = 7.6 Hz, 2H);  $^{13}\text{C}$  NMR 100 MHz,  $\text{CDCl}_3$ )  $\delta$  174.2, 147.9, 138.4, 134.2, 129.1, 127.8, 126.9, 125.4, 51.7, 33.9, 28.4, 28.4, 25.0, 24.8; IR (neat):  $\nu_{\text{max}}$  = 2950, 2605, 1734, 1670, 1601, 1564, 1450, 1436, 1407, 1364, 1337, 1301, 1260, 1197, 1157, 1134, 1048, 1030, 942, 861, 767, 735, 593, 547,

562, 428  $\text{cm}^{-1}$ ; HRMS (ESI):  $m/z$  calculated for  $\text{C}_{16}\text{H}_{18}\text{O}_4$ ,  $[\text{M} - \text{H}]^-$  273.1132, found, 273.1125.

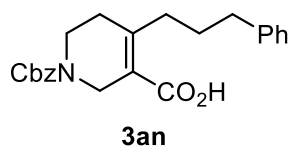

The reaction was conducted according to general experimental procedure noted above, which proceeded at room temperature for 12 hours to give compound **3an** (91 mg, 82% yield) as an amorphous powder.  $R_f$  = 0.6 (petroleum ether/ethyl acetate 1/1, v/v, containing 0.5% acetic acid e);  $^1\text{H}$  NMR (400 MHz,  $\text{CDCl}_3$ )  $\delta$  7.41 – 7.13 (m, 10H), 5.17 (s, 2H), 4.22 (s, 2H), 3.52 (t,  $J$  = 5.2 Hz, 2H), 2.63 (m, 4H), 2.29 (s, 2H), 1.80 (p,  $J$  = 8.0 Hz, 2H);  $^{13}\text{C}$  NMR (100 MHz,  $\text{CDCl}_3$ )  $\delta$  177.3, 171.1, 155.4/155.2, 154.7/154.0, 141.9, 136.6, 128.6, 128.4, 128.4, 128.4, 128.1, 128.1, 125.9, 121.4/120.8, 67.4, 62.2/160.5, 43.5, 39.8, 36.0, 34.9, 31.5, 20.9; IR (neat):  $\nu_{\text{max}}$  = 2930, 2915, 2607, 1685, 1629, 1428, 1116, 1085, 937, 774, 748, 691, 523, 435, 409  $\text{cm}^{-1}$ ; HRMS (ESI):  $m/z$  calculated for  $\text{C}_{23}\text{H}_{25}\text{NO}_4$ ,  $[\text{M} - \text{H}]^-$  378.1711, found, 378.1704.

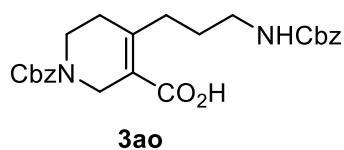

The reaction was conducted according to general experimental procedure noted above, which proceeded at room temperature for 12 hours to give compound **3ao** (83 mg, 61% yield) as an amorphous powder.  $R_f$  = 0.58 (petroleum ether/ethyl acetate 1/1, v/v, containing 0.5% acetic acid);  $^1\text{H}$  NMR (400 MHz,  $\text{CDCl}_3$ )  $\delta$  7.34 (m, 10H), 6.02 (s, 0H), 5.39 – 5.22 (m, 1H), 5.15 (s, 2H), 5.08 (s, 1H), 4.19 (s, 2H), 3.51 (m Hz, 2H), 3.16 (m, 2H), 2.54 (m, 2H), 2.24 (m, 2H), 1.67 (m, 2H);  $^{13}\text{C}$  NMR (100 MHz,  $\text{CDCl}_3$ )  $\delta$  169.7, 156.7, 136.8, 136.7, 129.0, 128.7, 128.7, 128.6, 128.5, 128.2, 128.2, 128.2, 127.9, 121.2, 67.5/66.7, 44.0, 40.8/39.7, 32.4/31.4, 28.3; IR (neat):  $\nu_{\text{max}}$  = 3342, 3033, 2935, 1688, 1529, 1498, 1416, 1337, 1289, 1239, 1212, 1121, 1081, 1027, 981, 909, 730, 695, 647, 605, 458, 407  $\text{cm}^{-1}$ ; HRMS (ESI):  $m/z$  calculated for  $\text{C}_{25}\text{H}_{28}\text{N}_2\text{O}_6$ ,  $[\text{M} - \text{H}]^-$  451.1875, found, 451.1866.

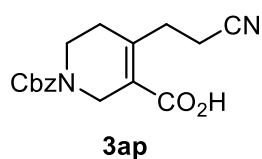

The reaction was conducted according to general experimental procedure noted above, which proceeded at room temperature for 12 hours to give compound **3ap** (83 mg, 90% yield) as an amorphous powder.  $R_f$  = 0.55 (petroleum ether/ethyl acetate 1/1, v/v, containing 0.5% acetic acid);  $^1\text{H}$  NMR (400 MHz,  $\text{CDCl}_3$ )  $\delta$  7.51 – 7.30 (m, 5H), 5.17 (s, 2H), 4.25 (s, 2H), 3.59 (m, 2H),

2.87 (m, 2H), 2.59 (t,  $J = 0.8$  Hz, 2H), 2.44 (m, 2H);  $^{13}\text{C}$  NMR (150 MHz,  $\text{CDCl}_3$ )  $\delta$  169.6, 155.1, 150.6/149.9, 136.6, 128.7, 128.3, 128.2, 124.6/123.9, 119.3, 67.6, 43.7/43.5, 40.1/39.6, 32.7/32.3, 30.9, 16.2; IR (neat):  $\nu_{\text{max}} = 2932, 2248, 1694, 1498, 1430, 1363, 1340, 1291, 1244, 1213, 1160, 1121, 1052, 1017, 962, 733, 700, 607, 462, 408\text{ cm}^{-1}$ ; HRMS (ESI):  $m/z$  calculated for  $\text{C}_{17}\text{H}_{18}\text{N}_2\text{O}_4$ ,  $[\text{M} - \text{H}]^-$  313.1194, found, 313.1186.

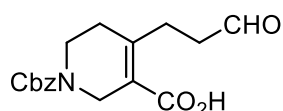

**3aq**

The reaction was conducted according to general experimental procedure noted above, which proceeded at room temperature for 12 hours to give compound **3aq** (61 mg, 66% yield) as an amorphous powder.  $R_f = 0.33$  (petroleum ether/ethyl acetate 1/1, v/v, containing 0.5% acetic acid);  $^1\text{H}$  NMR (400 MHz,  $\text{CDCl}_3$ )  $\delta$  9.79 (s, 1H), 7.48 – 7.29 (m, 5H), 5.16 (s, 2H), 4.20 (s, 2H), 3.55 (t,  $J = 6.0$  Hz, 2H), 2.83 (t,  $J = 7.6$  Hz, 2H), 2.71 – 2.61 (m, 2H), 2.32 (s, 2H);  $^{13}\text{C}$  NMR (100 MHz,  $\text{CDCl}_3$ )  $\delta$  201.4, 170.4, 155.4, 152.7, 136.6, 128.7, 128.3, 128.2, 122.9/122.2, 67.5, 43.6/42.4, 40.1/39.7, 31.8, 27.9, 20.9; IR (neat):  $\nu_{\text{max}} = 2924, 1699, 1497, 1434, 1363, 1338, 1291, 1243, 1213, 1122, 1027, 981, 764, 698\text{ cm}^{-1}$ ; HRMS (ESI):  $m/z$  calculated for  $\text{C}_{17}\text{H}_{19}\text{NO}_5$ ,  $[\text{M} - \text{H}]^-$  316.1190, found, 316.1183.

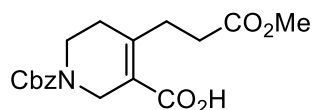

**3ar**

The reaction was conducted according to general experimental procedure noted above, which proceeded at room temperature for 12 hours to give compound **3ar** (110 mg, 90% yield) as an amorphous powder.  $R_f = 0.58$  (petroleum ether/ethyl acetate 1/1, v/v, containing 0.5% acetic acid);  $^1\text{H}$  NMR (400 MHz,  $\text{CDCl}_3$ )  $\delta$  7.39 – 7.29 (m, 5H), 5.16 (s, 2H), 4.21 (s, 2H), 3.67 (s, 3H), 3.55 (q,  $J = 6.0$  Hz, 2H), 2.83 (t,  $J = 8.0$  Hz, 2H), 2.50 (t,  $J = 8.0$  Hz, 2H), 2.32 (s, 3H);  $^{13}\text{C}$  NMR (100 MHz,  $\text{CDCl}_3$ )  $\delta$  173.5, 170.3/170.0, 155.4/155.1, 151.9/151.2, 136.6, 128.6, 128.2, 128.1, 122.8/122.3, 67.4, 51.9, 43.5, 40.0/39.7, 32.4, 31.6/31.4, 30.4; IR (neat):  $\nu_{\text{max}} = 2951, 1694, 1497, 1433, 1362, 1339, 1288, 1239, 1195, 1116, 1054, 1027, 965, 912, 878, 764, 732, 697, 655, 606, 569, 460, 405\text{ cm}^{-1}$ ; HRMS (ESI):  $m/z$  calculated for  $\text{C}_{18}\text{H}_{21}\text{NO}_6$ ,  $[\text{M} - \text{H}]^-$  346.1296, found, 346.1290.

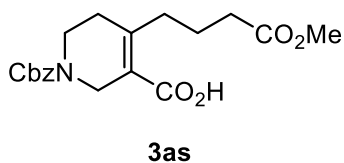

The reaction was conducted according to general experimental procedure noted above, which proceeded at room temperature for 12 hours to give compound **3as** (110 mg, 81% yield) as an amorphous powder.  $R_f = 0.57$  (petroleum ether/ethyl acetate 1/1, v/v, containing 0.5% acetic acid);  $^1\text{H}$  NMR (400 MHz,  $\text{CDCl}_3$ )  $\delta$  7.42 – 7.29 (m, 5H), 5.16 (s, 2H), 4.21 (s, 2H), 3.66 (s, 3H), 3.54 (m, 2H), 2.59 (m, 2H), 2.35 (m, 4H), 1.80 (p,  $J = 7.6$  Hz, 2H);  $^{13}\text{C}$  NMR (100 MHz,  $\text{CDCl}_3$ )  $\delta$  173.8, 170.6/169.9, 155.3/153.8, 153.7, 136.6, 136.5, 128.5, 128.1, 128.1, 128.1, 128.0, 121.3, 67.4/ 67.3, 51.6, 43.6, 42.4, 40.1/39.8, 34.2, 33.7, 31.5/31.3, 26.9, 25.5, 23.3; IR (neat):  $\nu_{\text{max}} = 2928, 1679, 1422, 1264, 909, 730, 708, 651, 419, 407\text{ cm}^{-1}$ ; HRMS (ESI):  $m/z$  calculated for  $\text{C}_{19}\text{H}_{23}\text{NO}_6$ ,  $[\text{M} - \text{H}]^-$  360.1453, found, 360.1455.

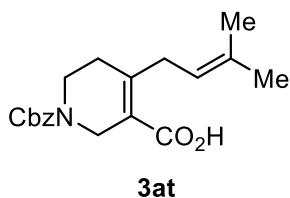

The reaction was conducted according to general experimental procedure noted above, which proceeded at room temperature for 12 hours to give compound **3at** (59 mg, 61% yield) as an amorphous powder.  $R_f = 0.67$  (petroleum ether/ethyl acetate 1/1, v/v, containing 0.5% acetic acid);  $^1\text{H}$  NMR (400 MHz,  $\text{CDCl}_3$ )  $\delta$  7.42 – 7.27 (m, 5H), 5.16 (s, 2H), 5.09 (t,  $J = 7.6$  Hz, 1H), 4.21 (s, 2H), 3.52 (t,  $J = 6.0$  Hz, 2H), 3.30 (d,  $J = 7.2$  Hz, 2H), 2.29 (s, 1H), 1.69 (d,  $J = 16.8$  Hz, 6H);  $^{13}\text{C}$  NMR (100 MHz,  $\text{CDCl}_3$ )  $\delta$  171.1, 155.0/153.8, 136.8, 134.2, 128.8, 128.6, 128.2, 128.1, 120.5, 67.4, 43.6, 40.0, 34.0, 31.0, 25.9, 18.2; IR (neat):  $\nu_{\text{max}} = 2925, 1697, 1497, 1431, 1362, 1337, 1291, 1237, 1209, 1116, 1046, 1018, 990, 916, 875, 764, 735, 697, 658, 607, 566, 528, 458, 407\text{ cm}^{-1}$ ; HRMS (ESI):  $m/z$  calculated for  $\text{C}_{19}\text{H}_{23}\text{NO}_4$ ,  $[\text{M} - \text{H}]^-$  328.1554, found, 328.1557.

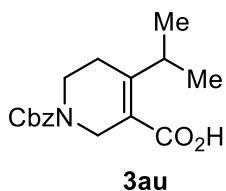

The reaction was conducted according to general experimental procedure noted above, which proceeded at room temperature for 12 hours to give compound **3au** (75 mg, 80% yield) as an amorphous powder.  $R_f = 0.6$  (petroleum ether/ethyl acetate 1/1, v/v, containing 0.5% acetic acid);  $^1\text{H}$  NMR (400 MHz,  $\text{CDCl}_3$ )  $\delta$  7.46 – 7.30 (m, 5H), 5.17 (s, 2H), 4.21 (s, 2H), 3.81 (m, 1H), 3.52 (t,  $J = 5.6$  Hz, 2H), 2.28 (s, 2H), 1.02 (d,  $J = 6.8$  Hz, 6H);  $^{13}\text{C}$  NMR (100 MHz,  $\text{CDCl}_3$ )  $\delta$  171.4, 158.7, 155.3, 136.7, 128.5, 128.1, 128.0, 119.6, 119.6, 67.2, 43.8/ 43.5, 40.2/39.8,

30.4/29.7, 24.7, 20.4; IR (neat):  $\nu_{\text{max}}$  = 2961, 2871, 1677, 1497, 1429, 1361, 1341, 1292, 1240, 1198, 1116, 1028, 978, 911, 890, 877, 764, 739, 716, 697, 645, 610, 542, 462  $\text{cm}^{-1}$ ; HRMS (ESI):  $m/z$  calculated for  $\text{C}_{17}\text{H}_{21}\text{NO}_4$ ,  $[\text{M} - \text{H}]^-$  302.1398, found, 302.1389.

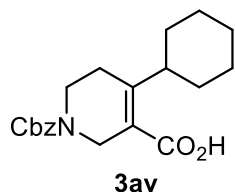

The reaction was conducted according to general experimental procedure noted above, which proceeded at room temperature for 12 hours to give compound **3av** (48 mg, 48% yield) as an amorphous powder.  $R_f$  = 0.62 (petroleum ether/ethyl acetate 1/1, v/v, containing 0.5% acetic acid);  $^1\text{H}$  NMR (400 MHz,  $\text{CDCl}_3$ )  $\delta$  7.41 – 7.29 (m, 5H), 5.16 (s, 2H), 4.21 (t,  $J$  = 2.4 Hz, 2H), 3.50 (t,  $J$  = 5.6 Hz, 2H), 3.47 – 3.35 (m, 1H), 2.29 (s, 2H), 1.73 (dd,  $J$  = 23.6, 12.9 Hz, 3H), 1.59 (d,  $J$  = 11.6 Hz, 2H), 1.43 – 1.18 (m, 5H);  $^{13}\text{C}$  NMR 100 MHz,  $\text{CDCl}_3$ )  $\delta$  170.8, 155.3, 136.7, 128.7, 128.5, 128.1, 128.0, 67.2, 43.6, 41.5/ 41.5, 40.3, 39.9/39.9, 30.5, 29.7, 26.2/26.1, 22.7, 14.1; IR (neat):  $\nu_{\text{max}}$  = 2924, 2851, 1681, 1497, 1432, 1362, 1339, 1292, 1239, 1208, 1136, 1113, 1028, 999, 980, 908, 889, 847, 802, 764, 729, 696, 647, 606, 543, 460  $\text{cm}^{-1}$ ; HRMS (ESI):  $m/z$  calculated for  $\text{C}_{20}\text{H}_{25}\text{NO}_4$ ,  $[\text{M} - \text{H}]^-$  342.1711, found, 342.1708.

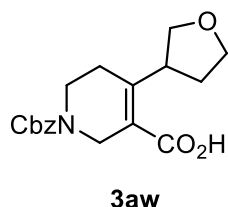

The reaction was conducted according to general experimental procedure noted above, which proceeded at room temperature for 12 hours to give compound **3aw** (50 mg, 53% yield) as an amorphous powder.  $R_f$  = 0.59 (petroleum ether/ethyl acetate 1/1, v/v, containing 0.5% acetic acid);  $^1\text{H}$  NMR (400 MHz,  $\text{CDCl}_3$ )  $\delta$  7.35 (m, 5H), 5.17 (s, 2H), 4.28 (d,  $J$  = 16.4 Hz, 2H), 4.17 (d,  $J$  = 18.0 Hz, 1H), 4.03 – 3.93 (m, 1H), 3.89 (m, 1H), 3.75 (m, 1H), 3.67 – 3.56 (m, 2H), 3.45 (mz, 1H), 2.33 (s, 2H), 2.18 – 2.10 (m, 1H), 1.87 – 1.74 (m, 1H);  $^{13}\text{C}$  NMR 100 MHz,  $\text{CDCl}_3$ )  $\delta$  169.8, 155.3, 150.8, 136.5, 128.5, 128.5, 128.1, 128.1, 127.7, 123.4, 70.6, 68.2, 67.3, 43.9, 40.4/ 39.7, 29.7/29.6, 27.2/26.7, 25.6; IR (neat):  $\nu_{\text{max}}$  = 2930, 2915, 2607, 1685, 1629, 1428, 1116, 1085, 937, 774, 748, 691, 523, 435, 409  $\text{cm}^{-1}$ ; HRMS (ESI):  $m/z$  calculated for  $\text{C}_{18}\text{H}_{21}\text{NO}_5$ ,  $[\text{M} - \text{H}]^-$  330.1347, found, 330.1339.

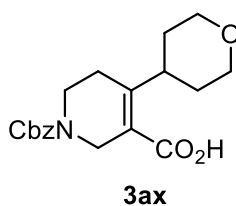

The reaction was conducted according to general experimental procedure noted above, which proceeded at room temperature for 12 hours to give compound **3ax** (110 mg, 69% yield) as an amorphous powder.  $R_f = 0.6$  (petroleum ether/ethyl acetate 1/1, v/v, containing 0.5% acetic acid);  $^1\text{H}$  NMR (400 MHz,  $\text{CDCl}_3$ )  $\delta$  7.35 (m, 5H), 5.17 (s, 2H), 4.23 (s, 2H), 4.01 (dd,  $J = 11.2$  Hz, 3.6 Hz, 2H), 3.71 (t,  $J = 12.0$  Hz, 1H), 3.58 – 3.38 (m, 4H), 2.30 (s, 2H), 1.68 (m, 2H), 1.48 (d,  $J = 12.0$  Hz, 2H);  $^{13}\text{C}$  NMR 100 MHz,  $\text{CDCl}_3$ )  $\delta$  170.5, 155.7/155.2, 136.6, 128.5, 128.1, 128.1, 121.6, 67.8, 67.3, 43.8, 40.2/39.8, 38.8, 30.0, 26.5; IR (neat):  $\nu_{\text{max}} = 2953$ , 2849, 1698, 1497, 1432, 1387, 1362, 1341, 1293, 1239, 1211, 1126, 1080, 1014, 983, 913, 878, 820, 764, 733, 698, 662, 606, 460, 413  $\text{cm}^{-1}$ ; HRMS (ESI):  $m/z$  calculated for  $\text{C}_{19}\text{H}_{23}\text{NO}_5$ ,  $[\text{M} - \text{H}]^-$  344.1503, found, 344.1500.

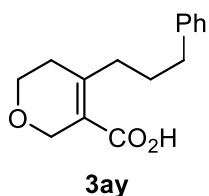

The reaction was conducted according to general experimental procedure noted above, which proceeded at room temperature for 12 hours to give compound **3ay** (55 mg, 66% yield) as an amorphous powder.  $R_f = 0.75$  (petroleum ether/ethyl acetate 1/1, v/v, containing 0.5% acetic acid);  $^1\text{H}$  NMR (400 MHz,  $\text{CDCl}_3$ )  $\delta$  7.31 – 7.23 (m, 2H), 7.19 (d,  $J = 7.6$  Hz, 3H), 4.32 (s, 2H), 3.74 (t,  $J = 5.6$  Hz, 2H), 2.65 (m, 4H), 2.29 (s, 2H), 1.82 (p,  $J = 8.0$  Hz, 2H);  $^{13}\text{C}$  NMR (150 MHz,  $\text{CDCl}_3$ )  $\delta$  170.8, 154.3, 142.1, 128.5, 128.5, 126.0, 122.6, 65.6, 63.9, 36.1, 34.8, 31.4, 30.0; IR (neat):  $\nu_{\text{max}} = 2925$ , 2854, 2249, 1683, 1636, 1496, 1453, 1417, 1268, 1131, 1086, 1023, 975, 906, 866, 727, 699, 648, 581, 544, 492, 408  $\text{cm}^{-1}$ ; HRMS (ESI):  $m/z$  calculated for  $\text{C}_{15}\text{H}_{18}\text{O}_3$ ,  $[\text{M} - \text{H}]^-$  245.1183, found, 245.1175.

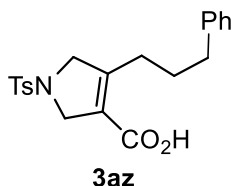

The reaction was conducted according to general experimental procedure noted above, which proceeded at room temperature for 12 hours to give compound **3az** (78 mg, 70% yield) as an amorphous powder.  $R_f = 0.62$  (Dichloromethane/Methanol = 10/1, v/v, containing 0.5% acetic acid);  $^1\text{H}$  NMR (400 MHz,  $\text{CDCl}_3$ )  $\delta$  7.72 (d,  $J = 8.4$  Hz, 2H), 7.32 (d,  $J = 8.0$  Hz, 2H), 7.26 (d,  $J = 7.6$  Hz, 2H), 7.15 (m, 3H), 4.29 (t,  $J = 4.4$  Hz, 2H), 4.23 (t,  $J = 4.4$  Hz, 2H), 2.57 (t,  $J = 8.0$  Hz, 4H), 2.41 (s, 3H), 1.77 – 1.65 (m, 2H);  $^{13}\text{C}$  NMR (100 MHz,  $\text{CDCl}_3$ )  $\delta$  167.9, 155.7, 144.0, 141.2, 133.5, 130.0, 128.3, 127.5, 126.1, 122.4, 58.6, 55.0, 35.7, 29.3,

27.5, 21.6; IR (neat):  $\nu_{\max}$  = 3026, 2925, 2858, 1687, 1653, 1598, 1495, 1453, 1345, 1289, 1163, 1100, 1076, 1017, 910, 815, 748, 700, 666, 601, 586, 547, 493, 408  $\text{cm}^{-1}$ ; HRMS (ESI):  $m/z$  calculated for  $\text{C}_{21}\text{H}_{23}\text{NO}_4\text{S}$ ,  $[\text{M} - \text{H}]^-$  384.1275, found, 384.1269.

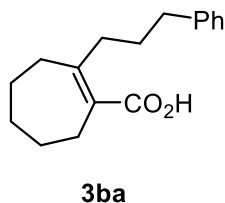

The reaction was conducted according to general experimental procedure noted above, which proceeded at room temperature for 12 hours to give compound **3ba** (110 mg, 86% yield) as an amorphous powder.  $R_f$  = 0.6 (petroleum ether/ethyl acetate 2/1, v/v, containing 0.5% acetic acid);  $^1\text{H}$  NMR (400 MHz,  $\text{CDCl}_3$ )  $\delta$  7.26 (t,  $J$  = 3.6 Hz, 2H), 7.18 (m, 3H), 2.66 (t,  $J$  = 7.8 Hz, 2H), 2.55 – 2.46 (m, 4H), 2.35 – 2.27 (m, 2H), 1.86 – 1.72 (m, 4H), 1.55 – 1.47 (m, 4H);  $^{13}\text{C}$  NMR (100 MHz,  $\text{CDCl}_3$ )  $\delta$  174.9, 158.6, 142.5, 130.1, 128.6, 128.4, 125.8, 37.1, 36.3, 36.2, 32.5, 30.0, 29.7, 26.6, 25.8; IR (neat):  $\nu_{\max}$  = 2923, 2852, 2620, 1679, 1611, 1449, 1404, 1281, 1259, 1242, 1136, 1043, 988, 939, 744, 689, 561, 513, 478, 407  $\text{cm}^{-1}$ ; HRMS (ESI):  $m/z$  calculated for  $\text{C}_{17}\text{H}_{22}\text{O}_2$ ,  $[\text{M} - \text{H}]^-$  257.1547, found, 257.1540.

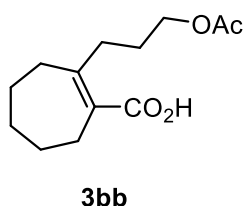

The reaction was conducted according to general experimental procedure noted above, which proceeded at room temperature for 12 hours to give compound **3bb** (83 mg, 80% yield) as an amorphous powder.  $R_f$  = 0.68 (petroleum ether/ethyl acetate 2/1, v/v, containing 0.5% acetic acid);  $^1\text{H}$  NMR (400 MHz,  $\text{CDCl}_3$ )  $\delta$  4.07 (t,  $J$  = 6.8 Hz, 2H), 2.49 (t,  $J$  = 7.6 Hz, 4H), 2.39 – 2.28 (m, 2H), 2.04 (s, 3H), 1.87 – 1.71 (m, 4H), 1.58 – 1.46 (m, 4H);  $^{13}\text{C}$  NMR (100 MHz,  $\text{CDCl}_3$ )  $\delta$  175.3, 171.4, 157.5, 130.8, 64.4, 36.2, 33.6, 32.4, 29.9, 27.0, 26.4, 25.7, 21.1; IR (neat):  $\nu_{\max}$  = 2923, 2852, 2620, 1679, 1611, 1449, 1404, 1281, 1259, 1242, 1136, 1043, 988, 939, 744, 689, 561, 513, 478, 407  $\text{cm}^{-1}$ ; HRMS (ESI):  $m/z$  calculated for  $\text{C}_{13}\text{H}_{20}\text{O}_4$ ,  $[\text{M} - \text{H}]^-$  239.1289, found, 239.1282.

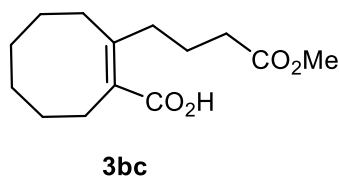

The reaction was conducted according to general experimental procedure noted above, which proceeded at room temperature for 12 hours to give compound **3bc** (110 mg, 83% yield) as an amorphous powder.  $R_f$  = 0.6 (petroleum ether/ethyl acetate 2/1, v/v, containing 0.5% acetic acid);  $^1\text{H}$  NMR (400 MHz,  $\text{CDCl}_3$ )  $\delta$  3.67 (s, 3H), 2.54 – 2.41 (m, 4H), 2.34 (m, 4H), 1.82

(p,  $J = 7.6$  Hz, 2H), 1.71 – 1.59 (m, 4H), 1.46 (m, 4H);  $^{13}\text{C}$  NMR (100 MHz,  $\text{CDCl}_3$ )  $\delta$  174.3, 174.1, 155.6, 127.4, 51.6, 34.2, 34.1, 33.4, 29.9, 29.2, 28.4, 26.8, 26.5, 23.9; IR (neat):  $\nu_{\text{max}} = 2922, 2852, 1738, 1677, 1617, 1437, 1406, 1371, 1295, 1248, 1197, 1176, 1144, 1102, 945, 892, 765, 418, 407\text{ cm}^{-1}$ ; HRMS (ESI):  $m/z$  calculated for  $\text{C}_{14}\text{H}_{22}\text{O}_4$ ,  $[\text{M} - \text{H}]^-$  253.1445, found, 253.1436.

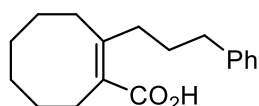

**3bd**

The reaction was conducted according to general experimental procedure noted above, which proceeded at room temperature for 12 hours to give compound **3bd** (97 mg, 83% yield) as an amorphous powder.  $R_f = 0.77$  (petroleum ether/ethyl acetate 2/1, v/v, containing 0.5% acetic acid);  $^1\text{H}$  NMR (400 MHz,  $\text{CDCl}_3$ )  $\delta$  7.32 – 7.12 (m, 5H), 2.78 – 2.60 (m, 2H), 2.47 (dd,  $J = 15.2, 10.0$  Hz, 4H), 2.40 – 2.25 (m, 2H), 1.83 (p,  $J = 8.0$  Hz, 2H), 1.64 (d,  $J = 23.2$  Hz, 4H), 1.46 (s, 4H);  $^{13}\text{C}$  NMR (100 MHz,  $\text{CDCl}_3$ )  $\delta$  174.4, 156.7, 142.5, 128.6, 128.4, 126.7, 125.8, 36.4, 35.0, 33.8, 30.4, 30.0, 29.2, 28.4, 26.9, 26.5; IR (neat):  $\nu_{\text{max}} = 2928, 1679, 1422, 1264, 909, 730, 708, 651, 419, 407\text{ cm}^{-1}$ ; HRMS (ESI):  $m/z$  calculated for  $\text{C}_{18}\text{H}_{24}\text{O}_2$ ,  $[\text{M} - \text{H}]^-$  271.1704, found, 271.1695.

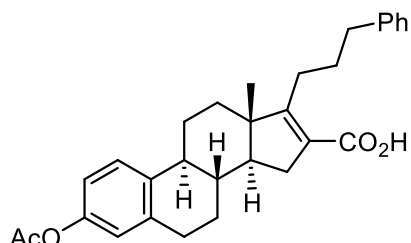

**3be**

The reaction was conducted according to general experimental procedure noted above, which proceeded at room temperature for 12 hours to give compound **3be** (70 mg, 64% yield) as an amorphous powder.  $R_f = 0.68$  (petroleum ether/ethyl acetate 2/1, v/v, containing 0.5% acetic acid);  $^1\text{H}$  NMR (400 MHz,  $\text{CDCl}_3$ )  $\delta$  7.44 – 7.38 (m, 3H), 7.33 (m, 3H), 7.01 – 6.90 (m, 2H), 3.07 – 2.91 (m, 3H), 2.84 (m, 2H), 2.71 (d, 1H), 2.53 – 2.47 (m, 1H), 2.41 (s, 6H), 2.13 – 1.89 (m, 4H), 1.72 (m, 4H), 1.58 (m, 1H), 0.97 (s, 3H);  $^{13}\text{C}$  NMR 100 MHz,  $\text{CDCl}_3$ )  $\delta$  172.8, 171.8, 169.9, 148.5, 142.2, 138.3, 137.9, 128.5, 128.3, 126.7, 126.0, 125.8, 121.6, 118.6, 53.8, 50.5, 44.2, 37.0, 36.5, 34.0, 32.0, 30.9, 29.4, 27.4, 27.2, 26.1, 21.1, 15.7; IR (neat):  $\nu_{\text{max}} = 3025, 2928, 2853, 1761, 1667, 1605, 1493, 1452, 1418, 1368, 1297, 1267, 1246, 1203, 1186, 1149, 1089, 1013, 976, 940, 919, 899, 822, 797, 780, 733, 698, 650, 613, 595, 564, 534, 513, 494, 448, 406\text{ cm}^{-1}$ .

<sup>1</sup>; HRMS (ESI): *m/z* calculated for C<sub>30</sub>H<sub>34</sub>O<sub>4</sub>, [M – H]<sup>–</sup> 457.2384, found, 457.2376; [α]<sub>D</sub><sup>25</sup> = + 41.06 (c 0.50, CHCl<sub>3</sub>).

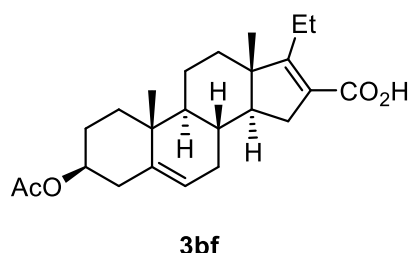

The reaction was conducted according to general experimental procedure noted above, which proceeded at room temperature for 12 hours to give compound **3bf** (49 mg, 53% yield) as an amorphous powder. *R<sub>f</sub>* = 0.62 (petroleum ether/ethyl acetate 2/1, v/v, containing 0.5%

acetic acid); <sup>1</sup>H NMR (400 MHz, CDCl<sub>3</sub>) δ 5.40 (d, *J* = 5.2 Hz, 1H), 4.61 (m, 1H), 2.79 – 2.66 (m, 1H), 2.47 (dd, *J* = 14.8, 6.8 Hz, 1H), 2.34 (d, *J* = 6.0 Hz, 2H), 2.25 (m, 1H), 2.15 (dd, *J* = 14.8, 11.6 Hz, 1H), 2.03 (s, 3H), 1.92 – 1.78 (m, 3H), 1.74 – 1.52 (m, 5H), 1.41 (m, 3H), 1.16 (dd, *J* = 14.6, 4.4 Hz, 1H), 1.12 – 1.03 (m, 7H), 0.85 (s, 3H); <sup>13</sup>C NMR 100 MHz, CDCl<sub>3</sub>) δ 174.5, 171.7, 170.6, 139.9, 126.0, 122.4, 73.8, 54.6, 50.3, 50.2, 38.1, 36.9, 36.8, 33.9, 32.2, 31.4, 30.5, 27.7, 21.4, 20.6, 20.4, 19.2, 15.5, 13.7; IR (neat): ν<sub>max</sub> = 2936, 1734, 1672, 1611, 1373, 1245, 1032, 406; HRMS (ESI): *m/z* calculated for C<sub>24</sub>H<sub>30</sub>O<sub>4</sub>, [M – H]<sup>–</sup> 385.2384, found, 385.2376; [α]<sub>D</sub><sup>25</sup> = –78.62 (c 0.46, CHCl<sub>3</sub>).

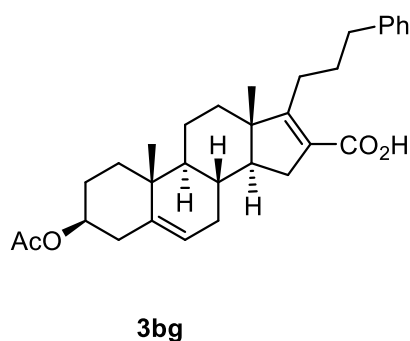

The reaction was conducted according to general experimental procedure noted above, which proceeded at room temperature for 12 hours to give compound **3bg** (69 mg, 64% yield) as an amorphous powder. *R<sub>f</sub>* = 0.76 (petroleum ether/ethyl acetate 2/1, v/v, containing 0.5%

acetic acid); <sup>1</sup>H NMR (400 MHz, CDCl<sub>3</sub>) δ 7.31 – 7.23 (m, 2H), 7.23 – 7.12 (m, 3H), 5.40 (d, *J* = 4.8 Hz, 1H), 4.61 (m, 1H), 2.73 (m, 3H), 2.48 (dd, *J* = 14.8, 6.8 Hz, 1H), 2.37 – 2.30 (m, 2H), 2.26 (m, 1H), 2.16 (dd, *J* = 14.8, 11.6 Hz, 1H), 2.03 (s, 3H), 1.86 (m, 3H), 1.80 – 1.70 (m, 2H), 1.68 – 1.59 (m, 3H), 1.55 (m, 1H), 1.39 (m, 2H), 1.26 (s, 2H), 1.20 – 1.08 (m, 1H), 1.05 (s, 4H), 0.84 (s, 3H); <sup>13</sup>C NMR 100 MHz, CDCl<sub>3</sub>) δ 172.8, 171.5, 170.7, 142.3, 140.0, 128.6, 128.4, 126.8, 125.9, 122.5, 74.0, 54.7, 50.4, 50.3, 38.2, 37.0, 36.9, 36.6, 34.1, 32.4, 31.5, 30.9, 30.6, 27.9, 27.3, 21.6, 20.7, 19.4, 15.7; IR (neat): ν<sub>max</sub> = 2934, 2852, 1732, 1671, 1609, 1496, 1453, 1436, 1373, 1244, 1091, 1032, 955, 907,

815, 933, 699, 948, 912, 514  $\text{cm}^{-1}$ ; HRMS (ESI):  $m/z$  calculated for  $\text{C}_{31}\text{H}_{40}\text{O}_4$ ,  $[\text{M} - \text{H}]^-$  475.2854, found, 475.2846;  $[\alpha]^{25}_{\text{D}} = -27.5$  (c 0.76,  $\text{CHCl}_3$ ).

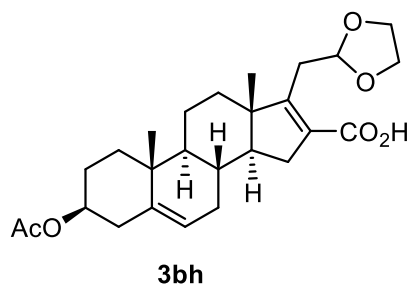

The reaction was conducted according to general experimental procedure noted above, which proceeded at room temperature for 12 hours to give compound **3bh** (51 mg, 51% yield) as an amorphous powder.  $R_f = 0.42$  (petroleum ether/ethyl acetate 2/1, v/v, containing 0.5%

acetic acid);  $^1\text{H}$  NMR (400 MHz,  $\text{CDCl}_3$ )  $\delta$  5.40 (d,  $J = 4.8$  Hz, 1H), 4.66 – 4.54 (m, 1H), 2.56 – 2.44 (m, 2H), 2.38 – 2.25 (m, 2H), 2.18 – 2.08 (m, 1H), 2.03 (s, 4H), 1.92 – 1.84 (m, 2H), 1.83 (s, 1H), 1.76 – 1.47 (m, 7H), 1.37 – 1.23 (m, 3H), 1.21 – 0.98 (m, 6H), 0.83 (s, 3H), 0.07 (s, 9H);  $^{13}\text{C}$  NMR 100 MHz,  $\text{CDCl}_3$ )  $\delta$  174.4, 172.7, 170.7, 139.9, 122.6, 122.1, 74.0, 54.3, 50.4, 50.3, 38.2, 37.0, 36.9, 34.2, 31.9, 31.5, 30.7, 27.9, 21.6, 20.8, 20.2, 19.4, 15.5, 0.4; IR (neat):  $\nu_{\text{max}} = 2941, 1732, 1674, 1611, 1373, 1245, 1125, 1033, 832, 733, 412$   $\text{cm}^{-1}$ ; HRMS (ESI):  $m/z$  calculated for  $\text{C}_{26}\text{H}_{36}\text{O}_6$ ,  $[\text{M} - \text{H}]^-$  443.2439, found, 443.2430;  $[\alpha]^{25}_{\text{D}} = -39.96$  (c 0.89,  $\text{CHCl}_3$ ).

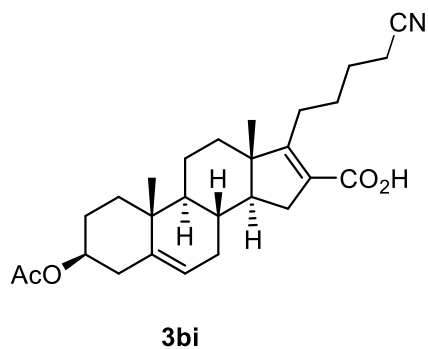

The reaction was conducted according to general experimental procedure noted above, which proceeded at room temperature for 12 hours to give compound **3bi** (54 mg, 53% yield) as an amorphous powder.  $R_f = 0.58$  (petroleum ether/ethyl acetate 2/1, v/v, containing 0.5% acetic acid);  $^1\text{H}$  NMR (400 MHz,  $\text{CDCl}_3$ )  $\delta$  5.38 (d,  $J =$

5.2 Hz, 1H), 4.59 (m, 1H), 2.74 (dt,  $J = 10.9, 7.5$  Hz, 1H), 2.46 (dd,  $J = 14.8, 6.8$  Hz, 1H), 2.41 – 2.24 (m, 5H), 2.24 – 2.15 (m, 1H), 2.15 – 2.09 (m, 1H), 2.08 (s, 2H), 2.02 (s, 4H), 1.90 – 1.76 (m, 3H), 1.76 – 1.68 (m, 3H), 1.68 – 1.53 (m, 7H), 1.53 – 1.41 (m, 2H), 1.35 (m, 2H), 1.29 – 1.04 (m, 3H), 1.04 (s, 3H), 0.84 (s, 3H);  $^{13}\text{C}$  NMR 100 MHz,  $\text{CDCl}_3$ )  $\delta$  177.5, 171.9, 170.7, 139.9, 127.5, 122.3, 119.7, 73.9, 54.6, 50.2, 38.1, 36.9, 36.8, 34.1, 32.3, 31.4, 30.5, 28.1, 27.8, 26.3, 25.6, 21.5, 20.6, 19.3, 16.9, 15.6; IR (neat):  $\nu_{\text{max}} = 2940, 2853, 2250, 1729, 1669, 1609, 1434, 1373, 1304, 1244, 1135, 1091, 1031, 971, 954, 909, 834, 815, 728,$

687, 647, 613, 545, 516, 455  $\text{cm}^{-1}$ ; HRMS (ESI):  $m/z$  calculated for  $\text{C}_{27}\text{H}_{37}\text{NO}_4$ ,  $[\text{M} - \text{H}]^-$  438.2650, found, 438.2650;  $[\alpha]^{25}_{\text{D}} = -73.77$  (c 1.18,  $\text{CHCl}_3$ ).

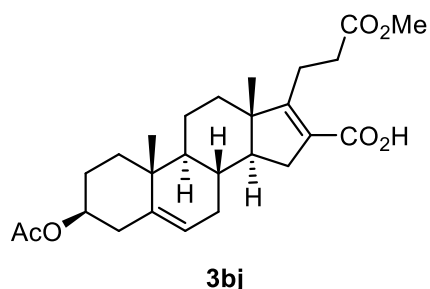

The reaction was conducted according to general experimental procedure noted above, which proceeded at room temperature for 12 hours to give compound **3bj** (69 mg, 68% yield) as an amorphous powder.  $R_f = 0.56$  (petroleum ether/ethyl acetate 2/1, v/v, containing 0.5% acetic acid);  $^1\text{H}$  NMR (400 MHz,  $\text{CDCl}_3$ )  $\delta$  5.39 (d,  $J = 5.0$  Hz, 1H), 4.66 – 4.55 (m, 1H), 3.67 (s, 3H), 2.75 (m, 1H), 2.47 (dd,  $J = 14.8, 6.8$  Hz, 1H), 2.41 – 2.29 (m, 4H), 2.25 (dd,  $J = 12.4, 7.6$  Hz, 1H), 2.14 (dd,  $J = 14.8, 11.6$  Hz, 1H), 2.03 (s, 4H), 1.91 – 1.75 (m, 5H), 1.66 (t,  $J = 10.0$  Hz, 3H), 1.61 – 1.52 (m, 2H), 1.52 – 1.43 (m, 1H), 1.43 – 1.31 (m, 2H), 1.13 (m, 1H), 1.05 (s, 3H), 0.85 (s, 3H);  $^{13}\text{C}$  NMR 100 MHz,  $\text{CDCl}_3$ )  $\delta$  171.7, 171.7, 170.6, 139.9, 127.4, 122.3, 122.3, 73.8, 54.5, 51.5, 50.2, 38.1, 36.9, 36.8, 34.1, 33.9, 32.3, 31.4, 30.4, 27.7, 26.5, 24.2, 21.4, 20.5, 19.2, 15.5; IR (neat):  $\nu_{\text{max}} = 2941, 2854, 1731, 1694, 1614, 1418, 1373, 1242, 1178, 1094, 1031, 971, 937, 855, 834, 816, 714, 668, 612, 544, 514, 466, 412$   $\text{cm}^{-1}$ ; HRMS (ESI):  $m/z$  calculated for  $\text{C}_{26}\text{H}_{36}\text{O}_6$ ,  $[\text{M} - \text{H}]^-$  443.2439, found, 443.2432;  $[\alpha]^{25}_{\text{D}} = -65.62$  (c 0.57,  $\text{CHCl}_3$ ).

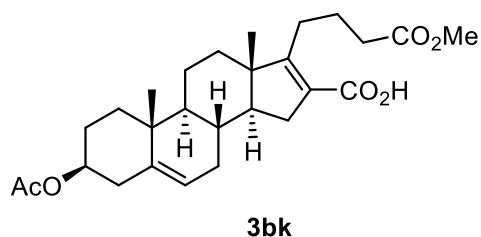

The reaction was conducted according to general experimental procedure noted above, which proceeded at room temperature for 12 hours to give compound **3bk** (64 mg, 63% yield) as an amorphous powder.  $R_f = 0.56$  (petroleum ether/ethyl acetate 2/1, v/v, containing 0.5% acetic acid);  $^1\text{H}$  NMR (400 MHz,  $\text{CDCl}_3$ )  $\delta$  5.39 (d,  $J = 5.0$  Hz, 1H), 4.70 – 4.49 (m, 1H), 3.66 (s, 4H), 2.74 (dt,  $J = 11.2, 8.0$  Hz, 1H), 2.46 (dd,  $J = 14.8, 6.8$  Hz, 1H), 2.40 – 2.22 (m, 6H), 2.19 – 2.08 (m, 1H), 2.03 (s, 3H), 1.82 (m, 4H), 1.71 – 1.54 (m, 6H), 1.43 (dd,  $J = 12.0, 4.4$  Hz, 1H), 1.40 – 1.30 (m, 2H), 1.14 (m, 1H), 1.05 (s, 3H), 0.85 (s, 3H);  $^{13}\text{C}$  NMR 100 MHz,  $\text{CDCl}_3$ )  $\delta$  174.1, 171.8, 170.7, 140.0, 127.5, 122.4, 74.0, 54.6, 51.6, 50.4, 50.3, 38.2, 37.0, 36.9, 34.3, 34.1, 32.4, 31.5, 30.6, 27.8, 26.7, 24.4, 21.6, 20.7, 19.4, 15.6; IR (neat):  $\nu_{\text{max}} = 2946, 2852,$

2255, 1731, 1669, 1610, 1435, 1372, 1302, 1241, 1199, 1169, 1091, 1031, 972, 955, 914, 882, 834, 815, 731, 687, 647, 612, 544, 517, 454  $\text{cm}^{-1}$ ; HRMS (ESI):  $m/z$  calculated for  $\text{C}_{26}\text{H}_{36}\text{O}_6$ ,  $[\text{M} - \text{H}]^-$  457.2596, found, 457.2587;  $[\alpha]^{25}_{\text{D}} = -72.32$  (c 0.46,  $\text{CHCl}_3$ ).

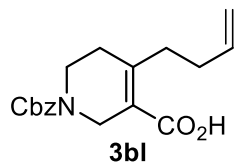

The reaction was conducted according to general experimental procedure noted above, which proceeded at room temperature for 12 hours to give compound **3bl** (79 mg, 85% yield) as an amorphous powder.  $R_f = 0.67$  (petroleum ether/ethyl acetate 2/1, v/v, containing 0.5% acetic acid);  $^1\text{H}$  NMR (400 MHz,  $\text{CDCl}_3$ )  $\delta$  7.34 (m, 5H), 5.83 (m, 1H), 5.17 (s, 2H), 5.10 – 4.91 (m, 2H), 4.22 (s, 2H), 3.53 (m, 2H), 2.66 (t,  $J = 8.0$  Hz, 2H), 2.40 – 2.15 (m, 4H);  $^{13}\text{C}$  NMR (150 MHz,  $\text{CDCl}_3$ )  $\delta$  170.6, 155.4/154.5, 137.9, 136.8, 128.7, 128.2, 128.1, 121.6, 115.3, 67.4, 43.8/43.6, 40.2/39.9, 32.6, 32.0/31.8, 18.1; IR (neat):  $\nu_{\text{max}} = 3037, 2917, 2865, 1699, 1640, 1498, 1434, 1363, 1338, 1292, 1243, 1292, 1212, 1126, 995, 913, 1736, 698, 606, 407$   $\text{cm}^{-1}$ ; HRMS (ESI):  $m/z$  calculated for  $\text{C}_{18}\text{H}_{21}\text{NO}_4$ ,  $[\text{M} - \text{H}]^-$  314.1389, found, 314.1385.

## 7. References

- [1] Karaki, F.; Ohgane, K.; Fukuda, H.; Nakamura, M.; Dodo, K.; Hashimoto, Y. Structure-activity relationship study of non-steroidal NPC1L1 ligands identified through cell-based assay using pharmacological chaperone effect as a readout. *Bioorg. Med. Chem.* **2014**, 22, 3587– 3609.
- [2] Bae, Y. K.; Cho, C. S. Palladium-catalyzed carbonylative cyclization of  $\beta$ -bromo- $\alpha,\beta$ -unsaturated carboxylic acids with 2,2-dimethylhydrazine leading to 1-(dimethylamino)-1H -pyrrole-2,5-diones. *Appl. Organomet. Chem.* **2014**, 28, 225 – 229.
- [3] Ren, H.; Li, Z.; Knochel, P. Chemoselective C(sp<sup>3</sup>)–H Bond Activation for the Preparation of Condensed N-Heterocycles. *Chem.—Asian J.* **2007**, 2, 416 – 433.
- [4] Shirakawa, E.; Imazaki, Y.; Hayashi, T. Ruthenium-catalyzed transformation of alkenyl triflates to alkenyl halides. *Chem. Commun.* **2009**, 5088 – 5090.

## 8. NMR Spectra

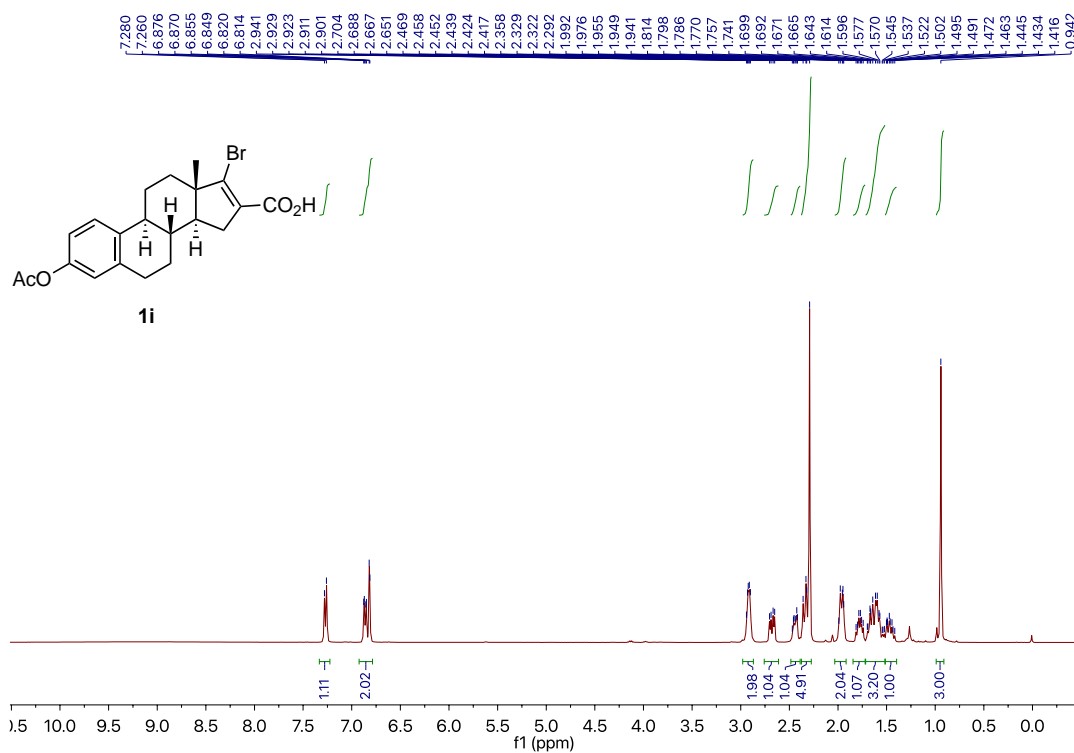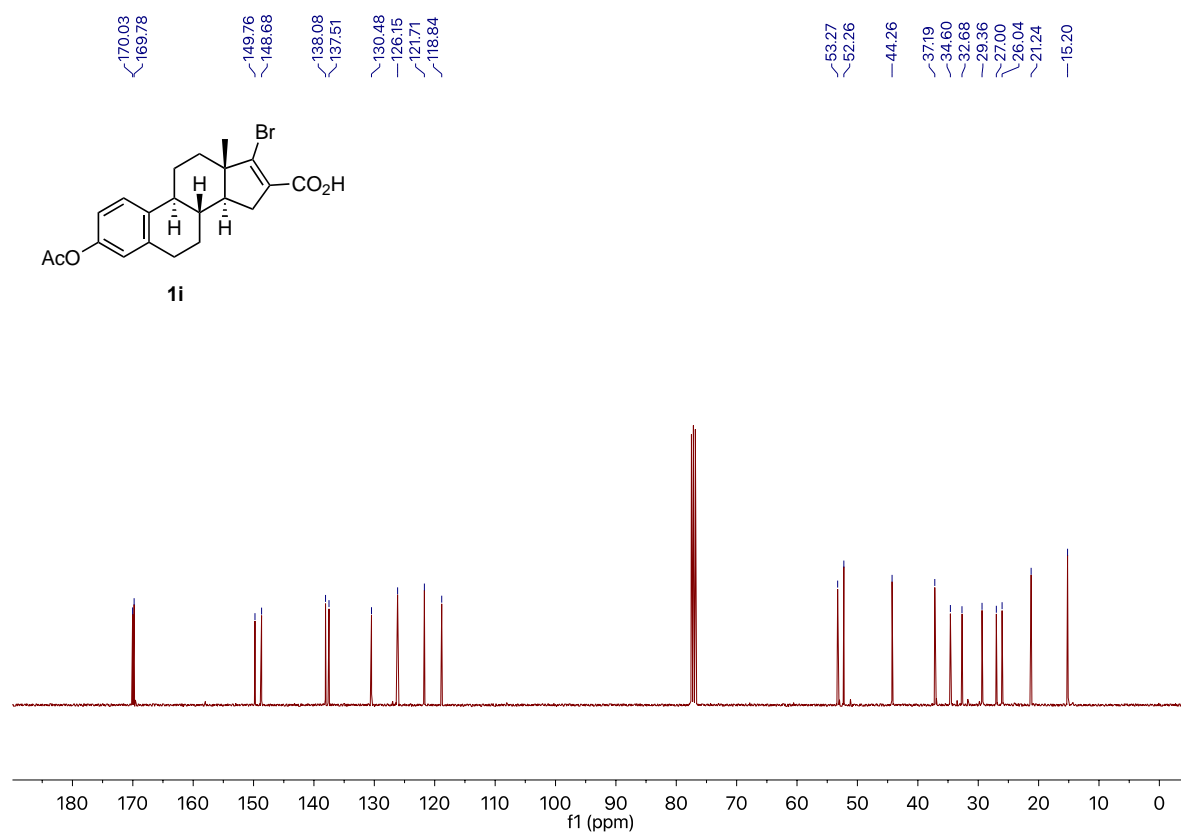

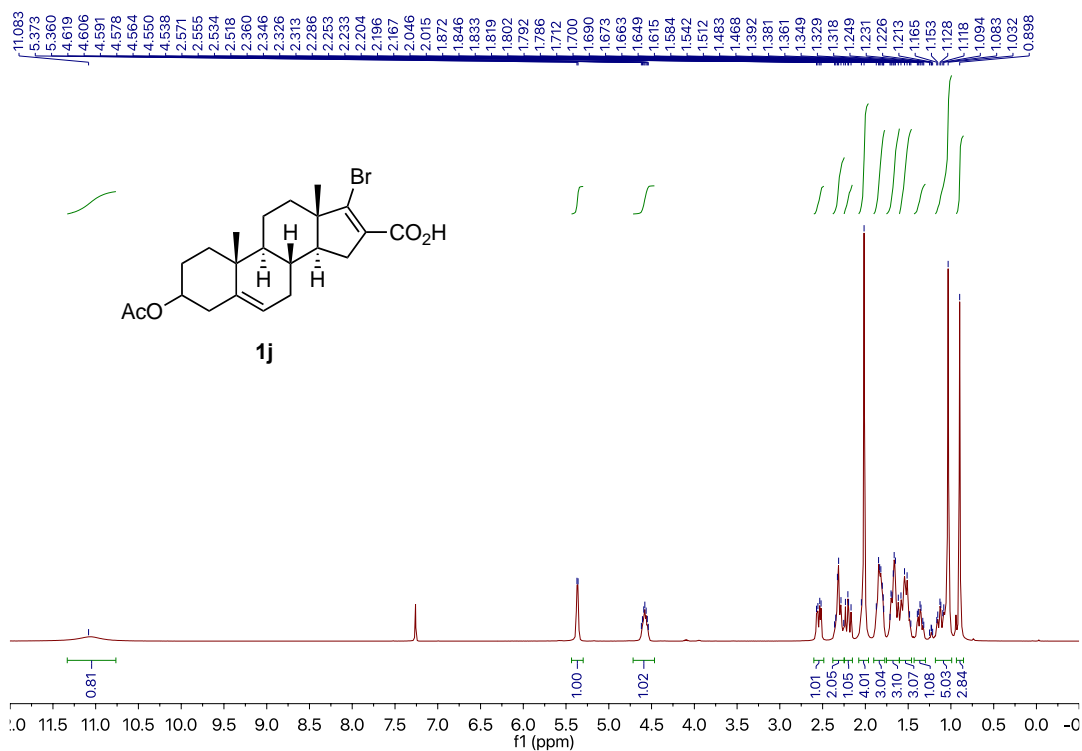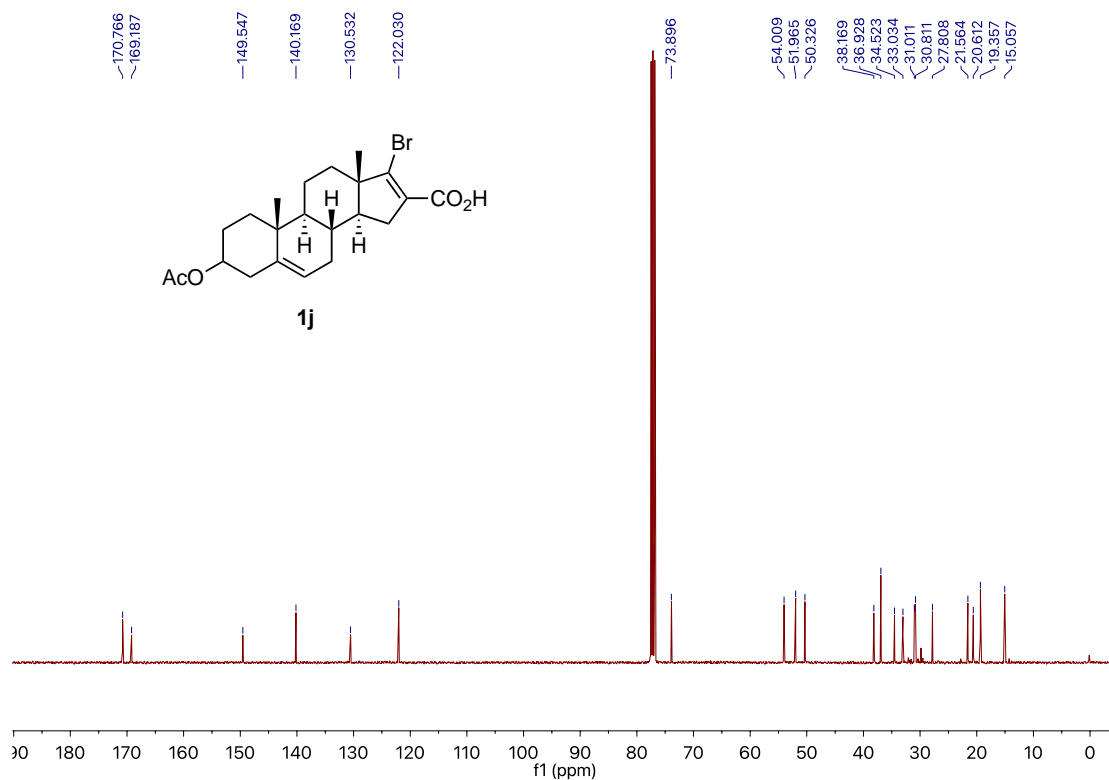

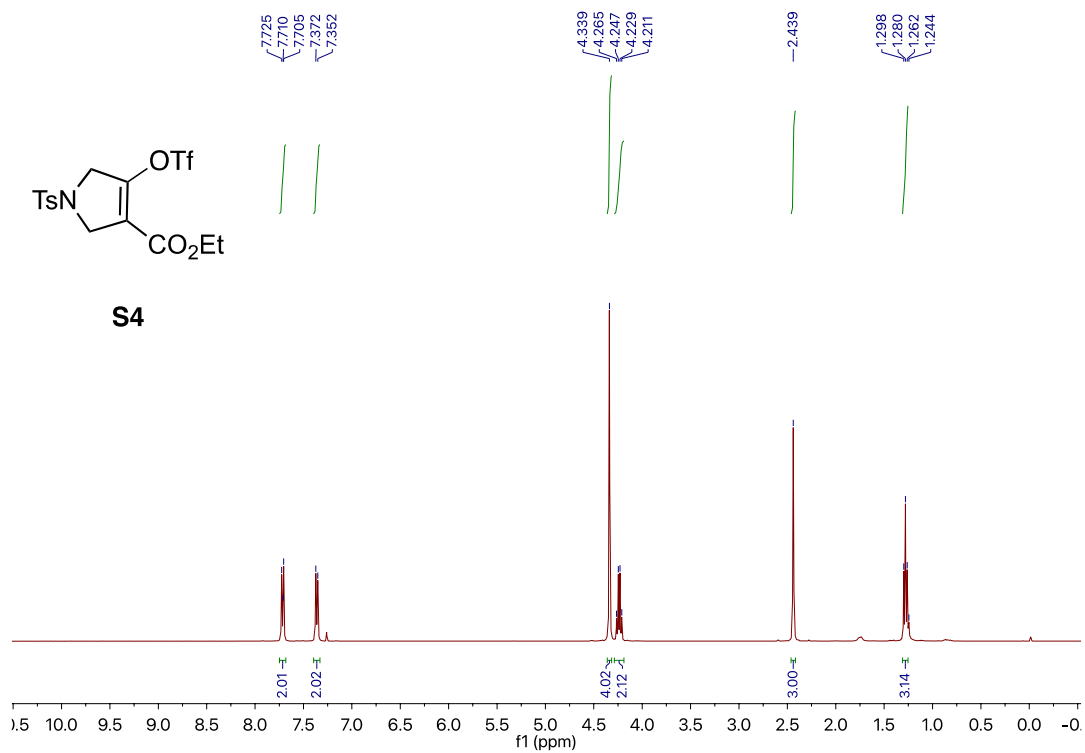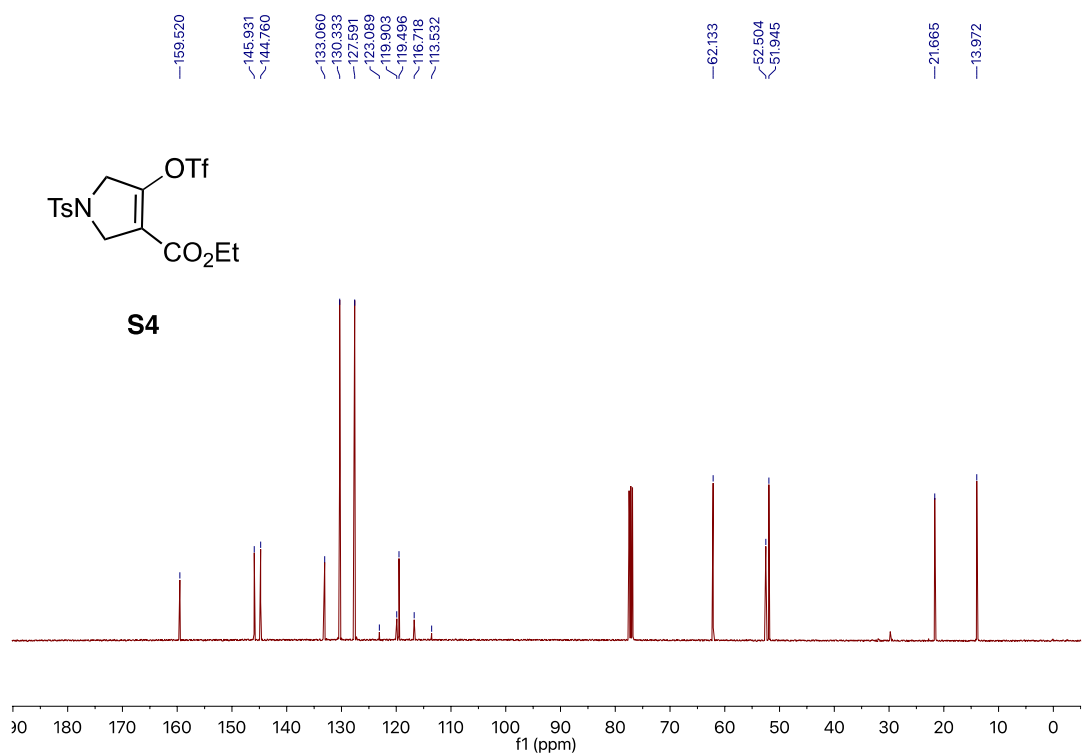

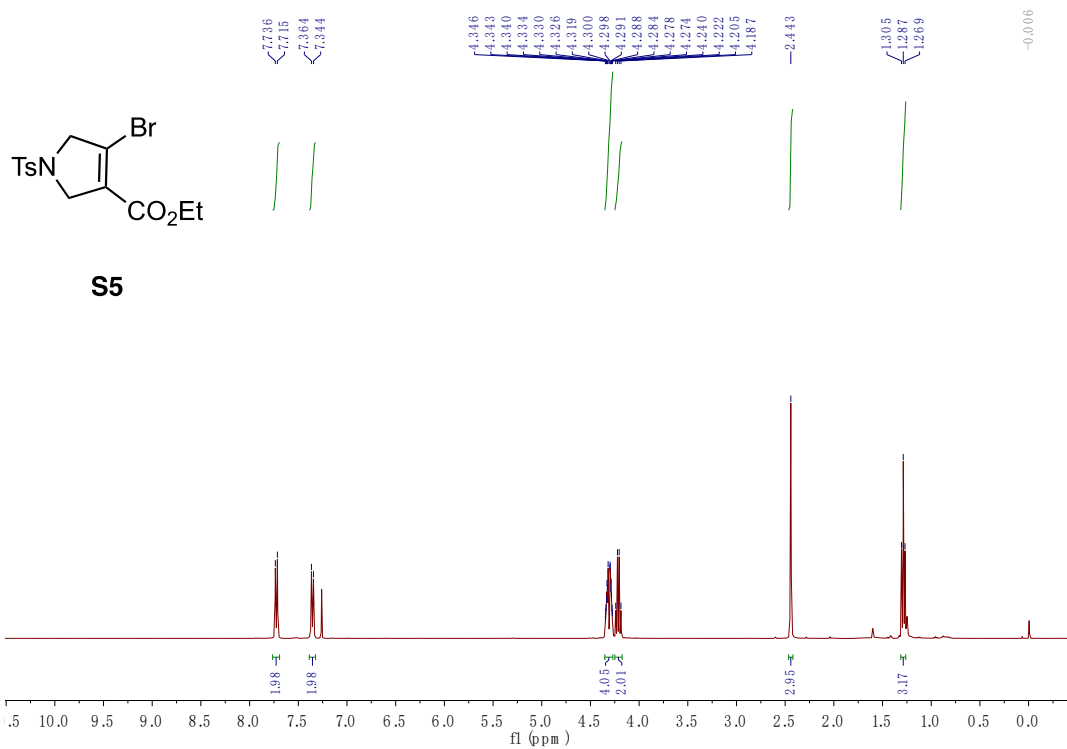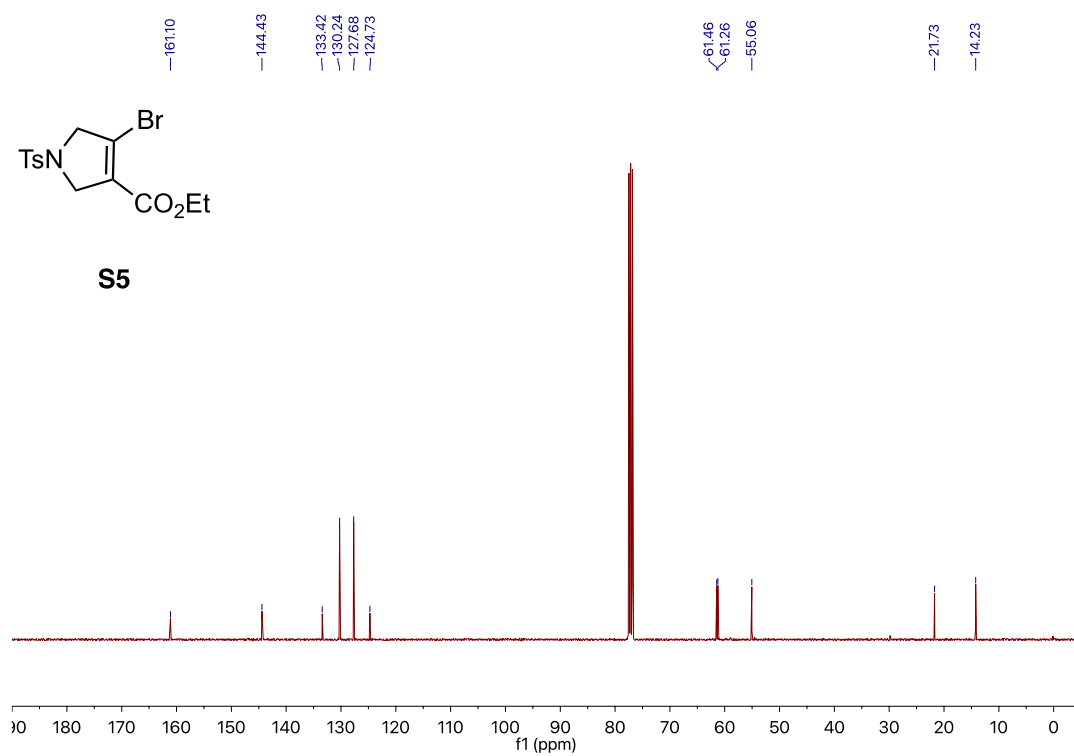

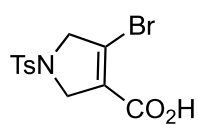

**1k**

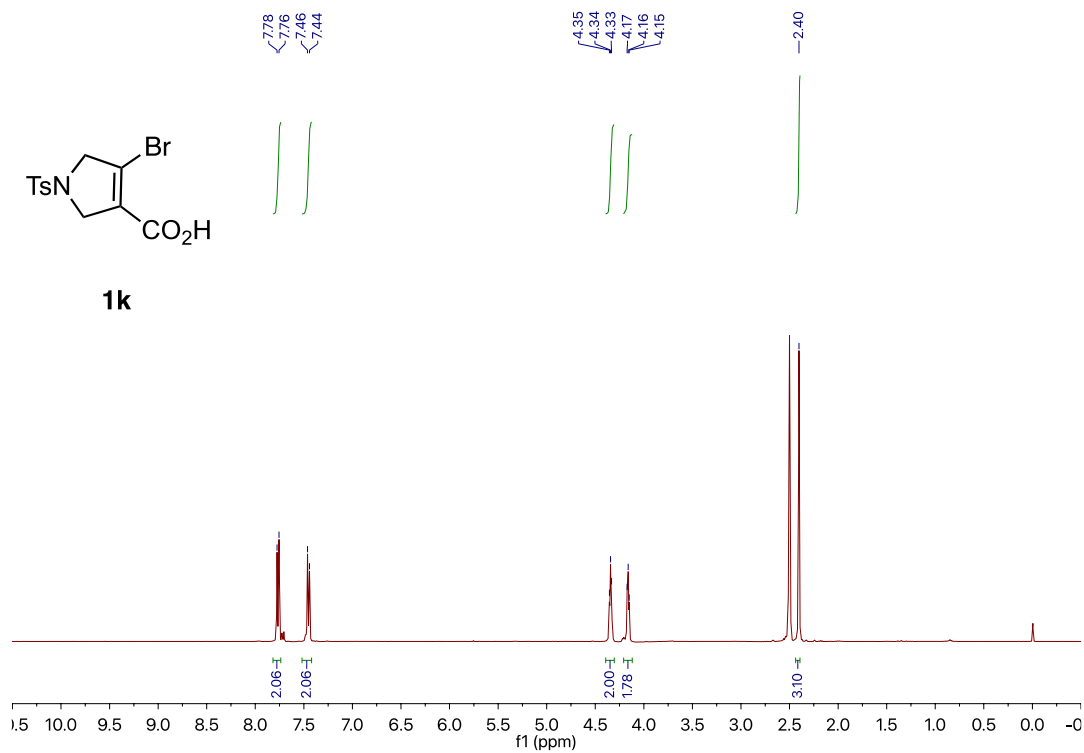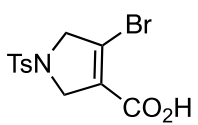

**1k**

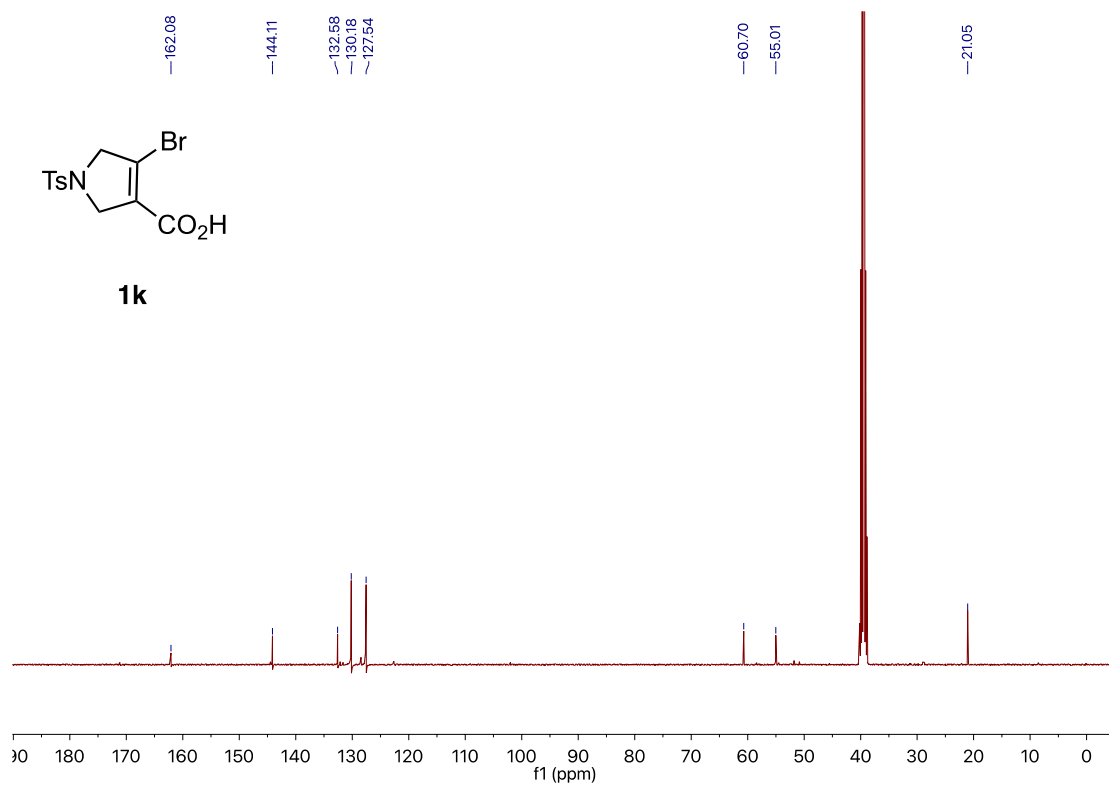

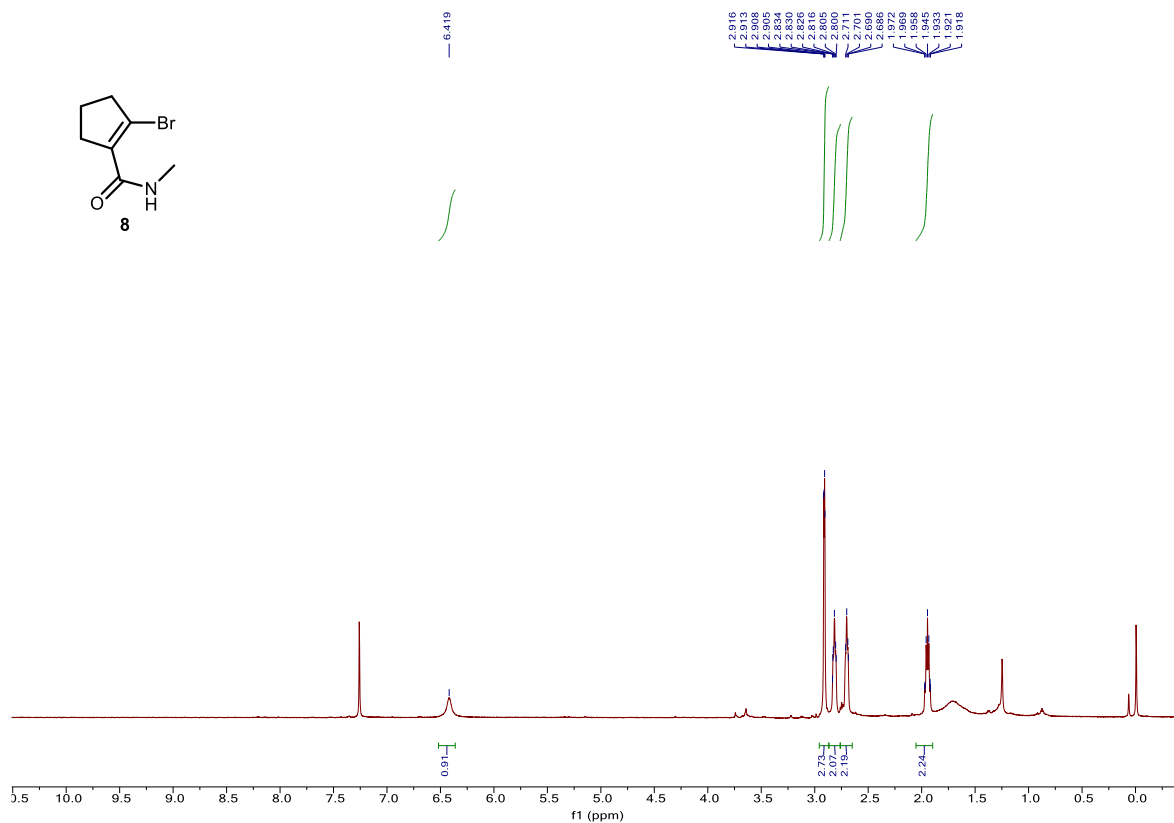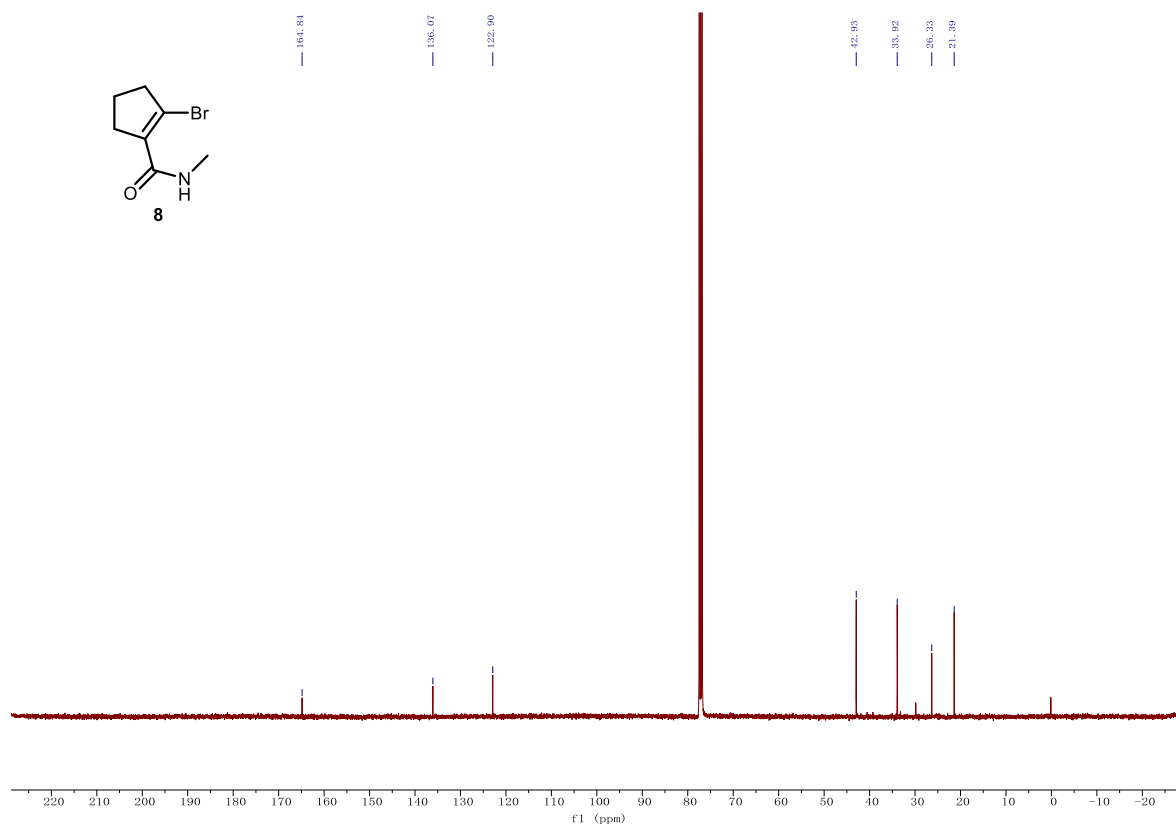

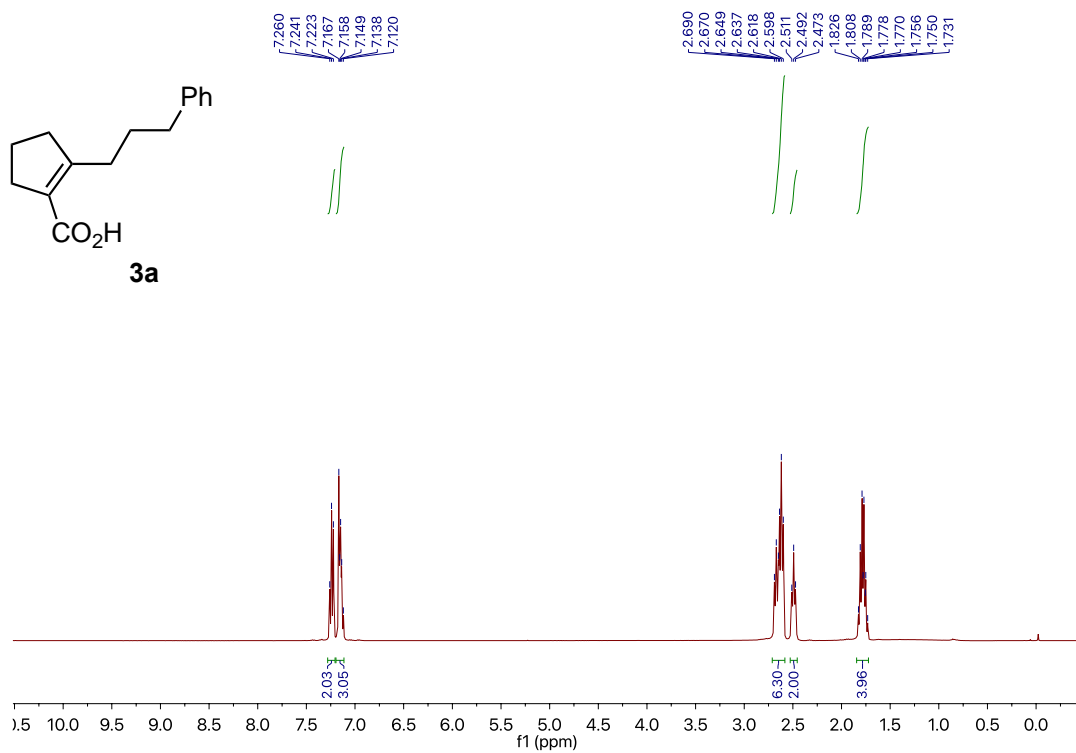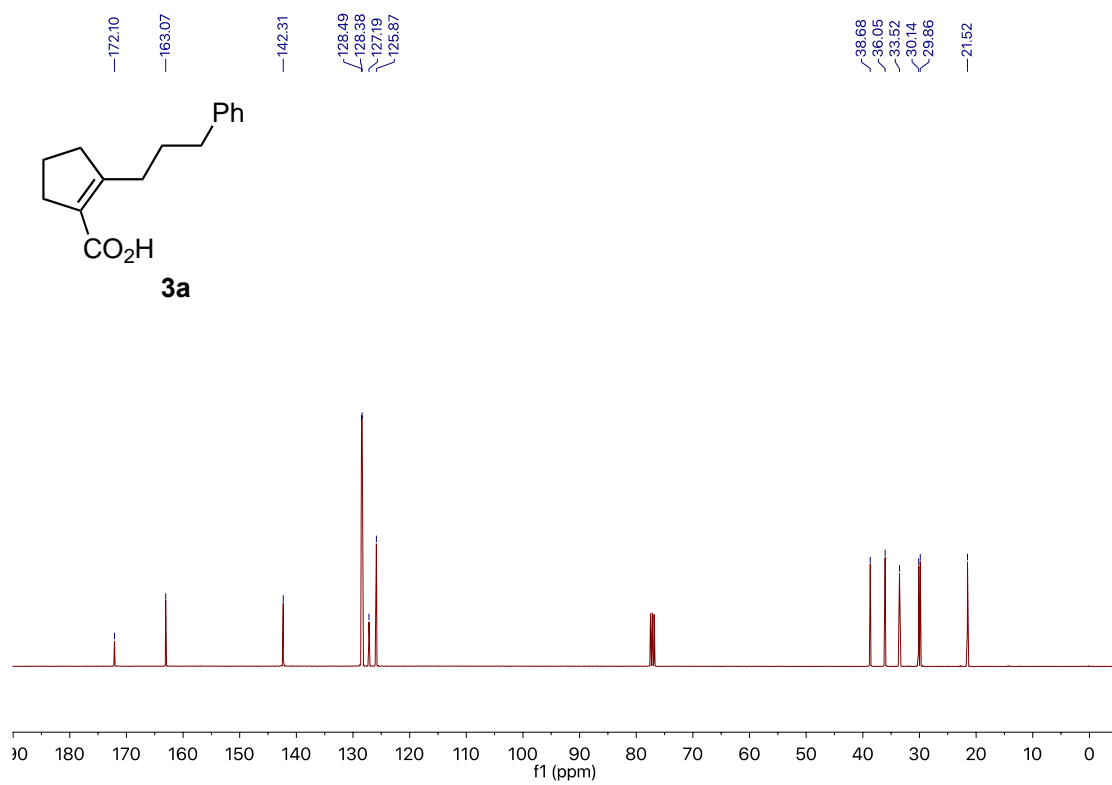

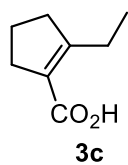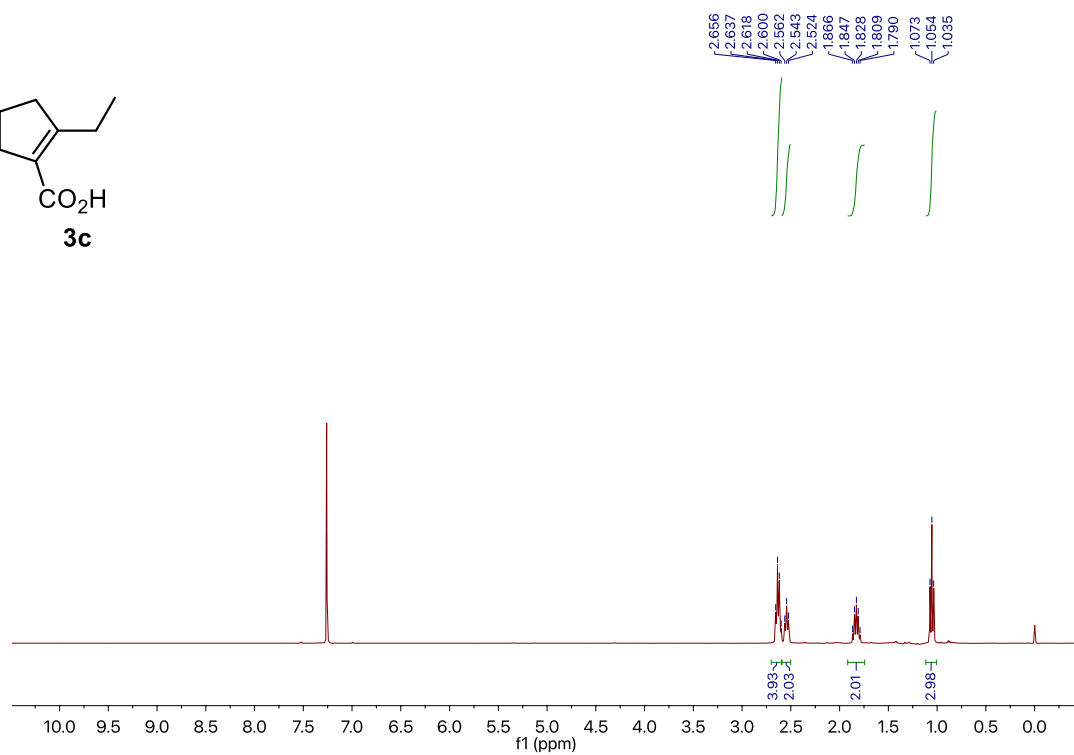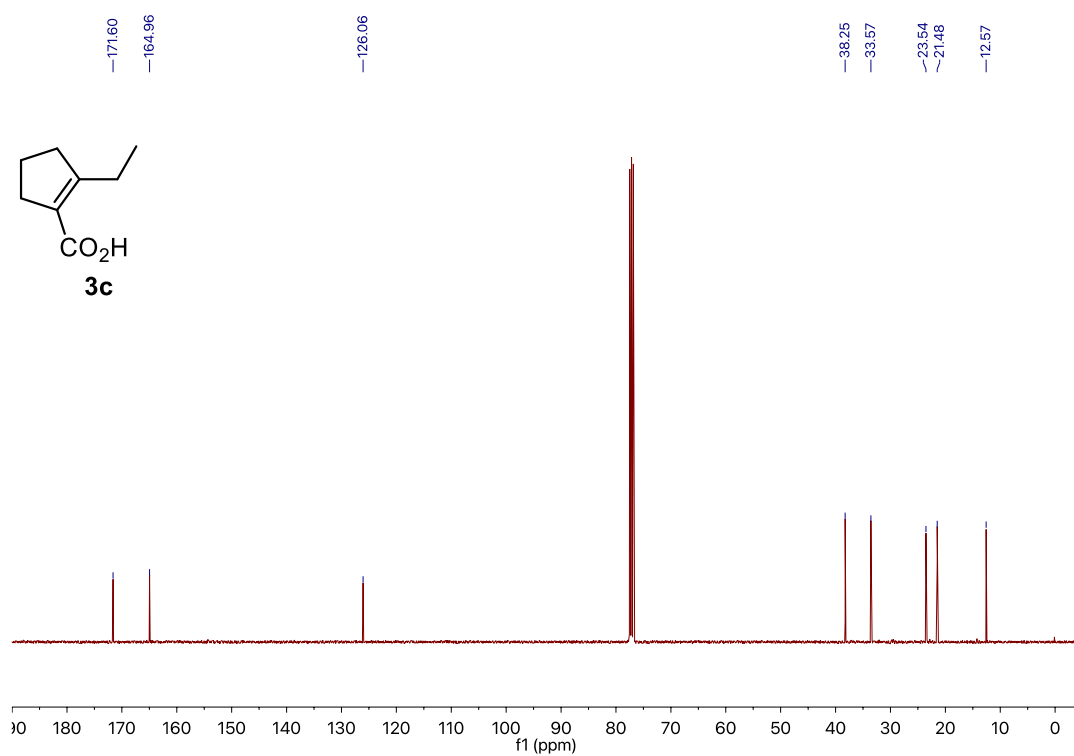

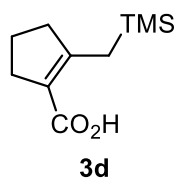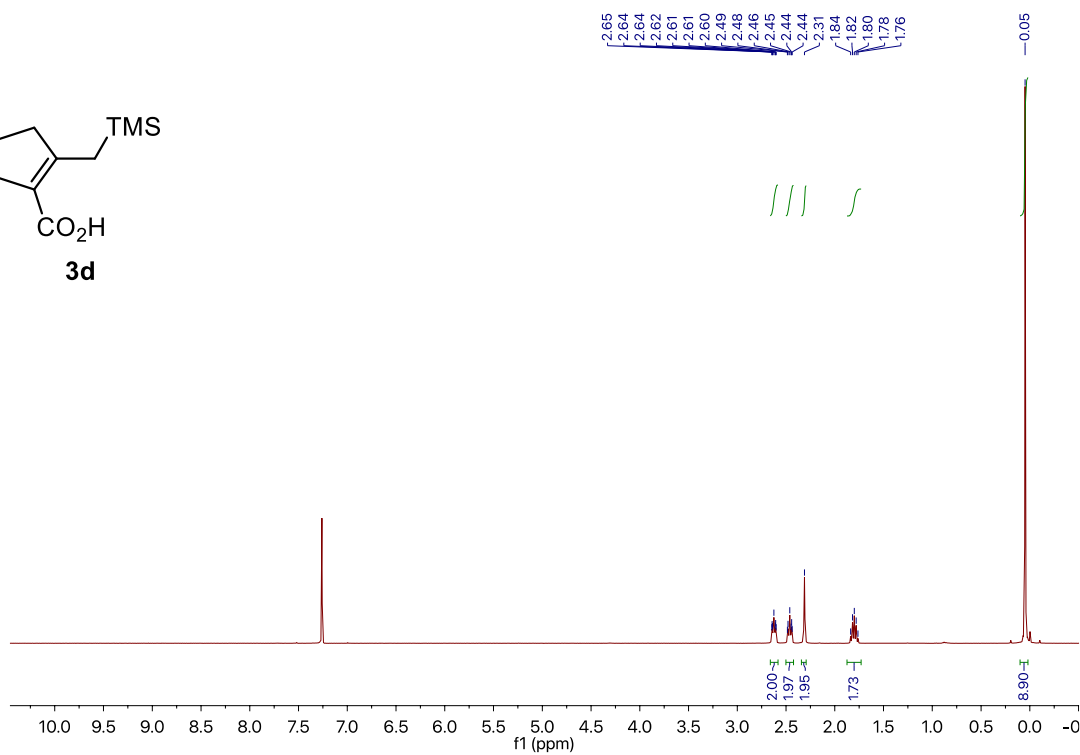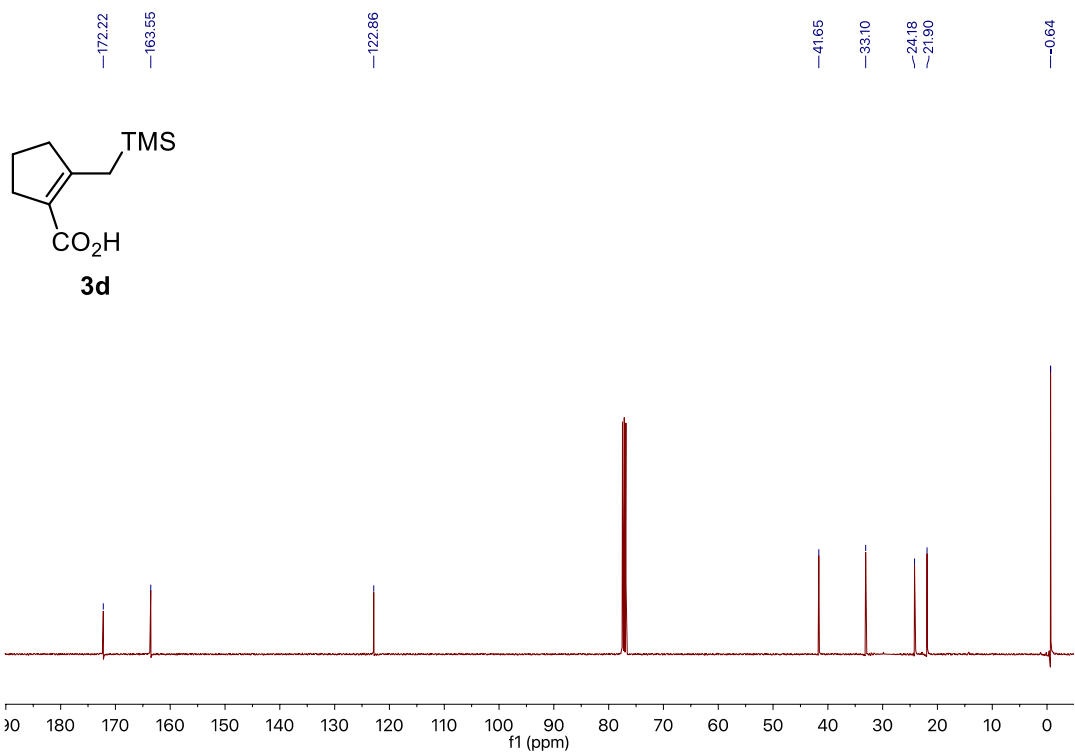

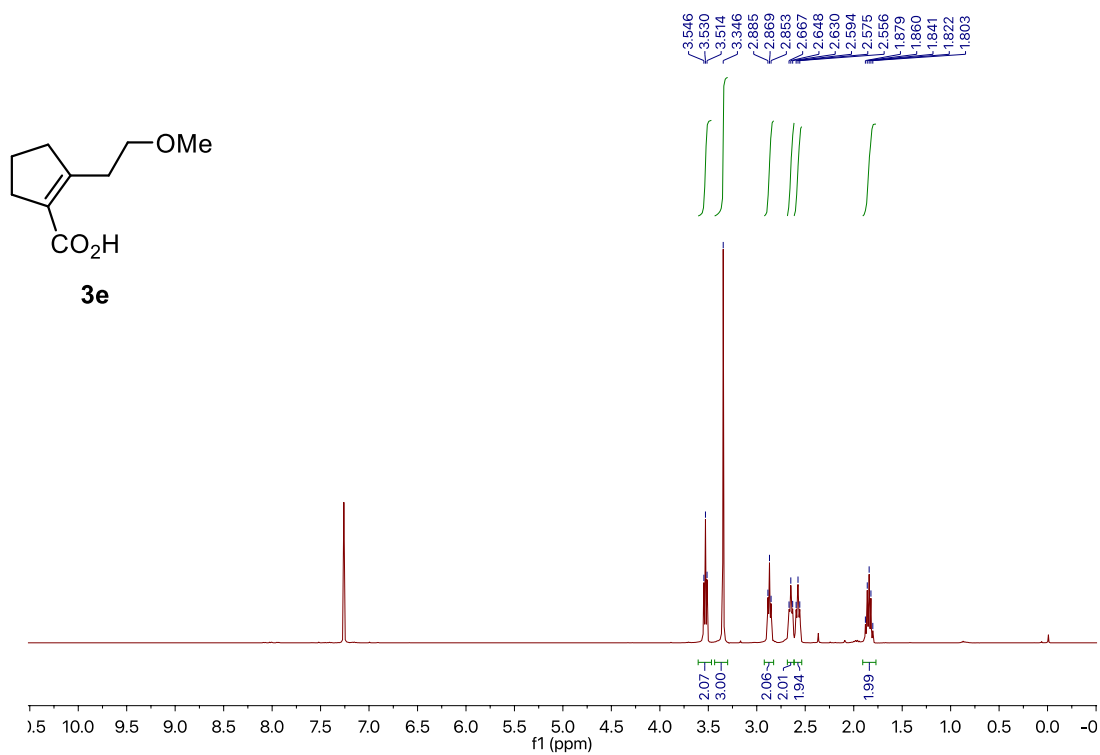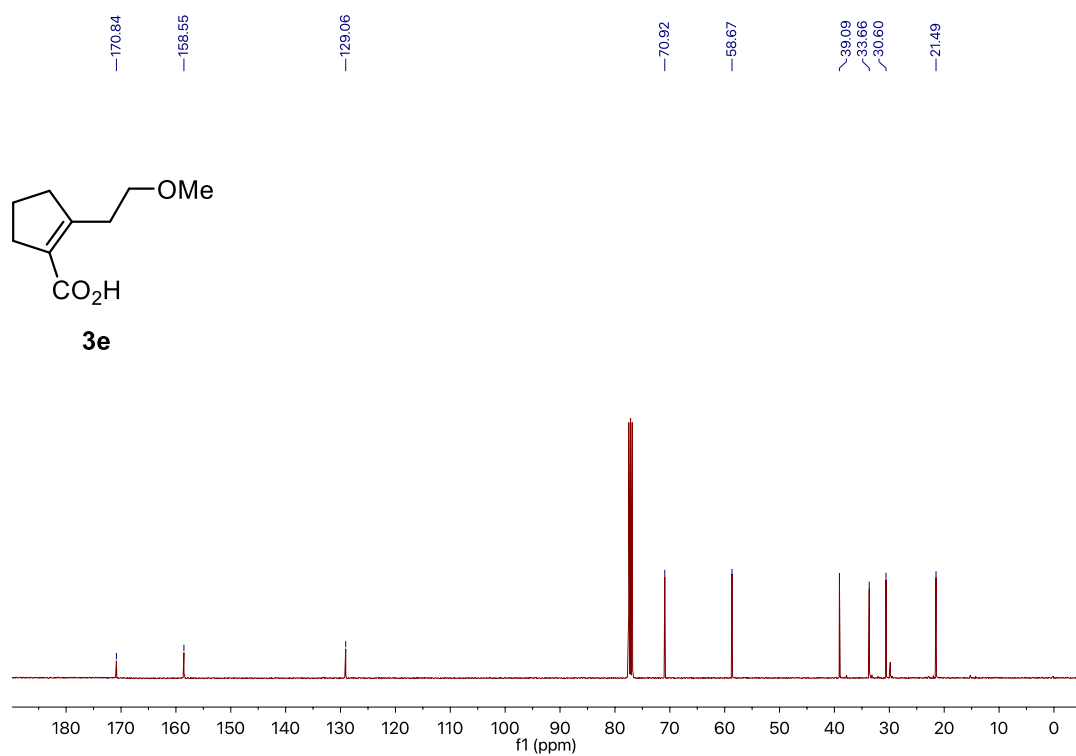

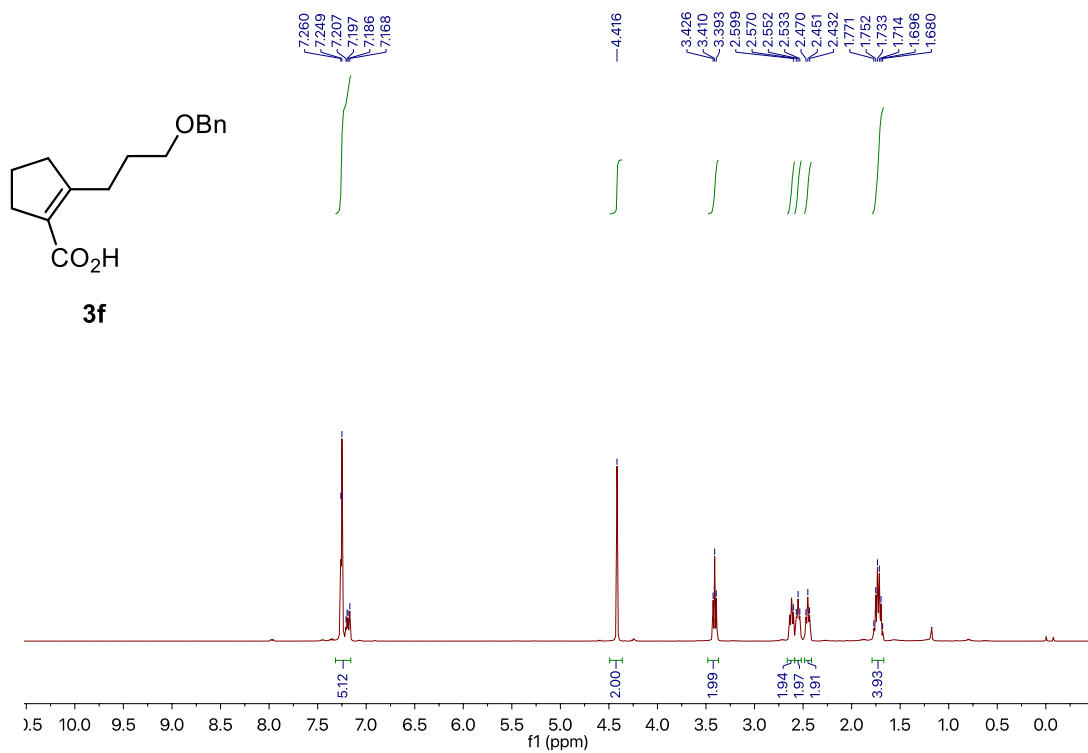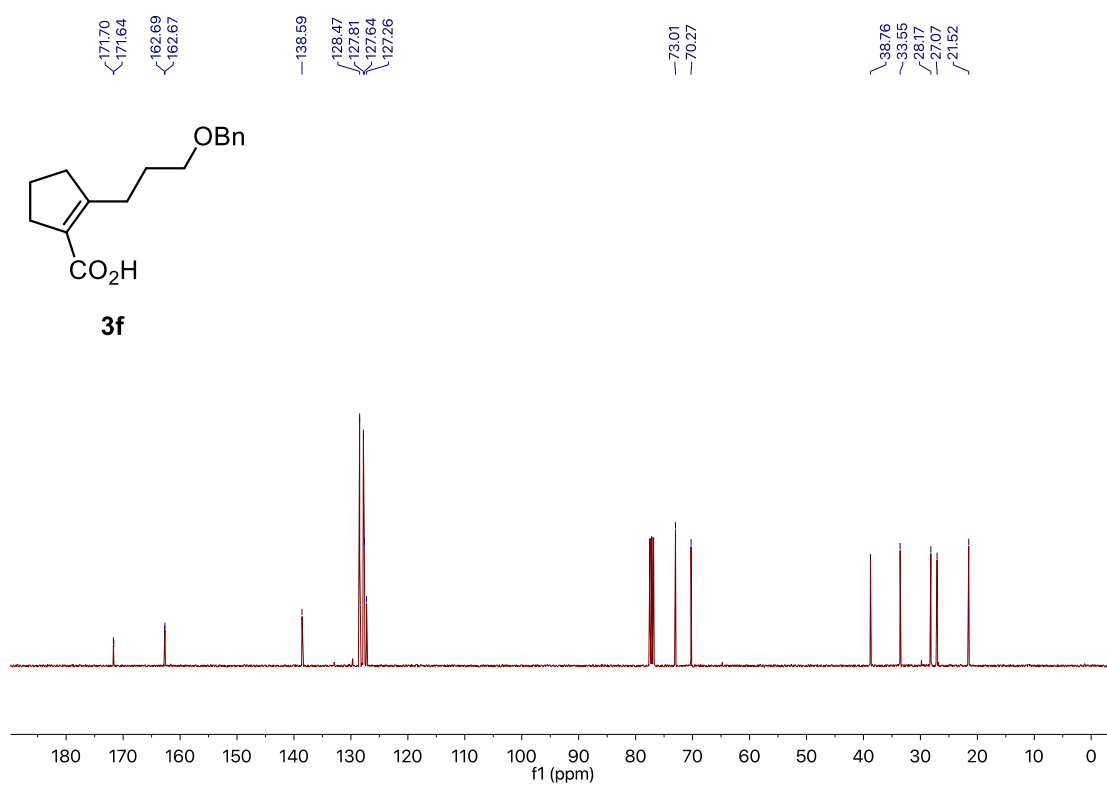

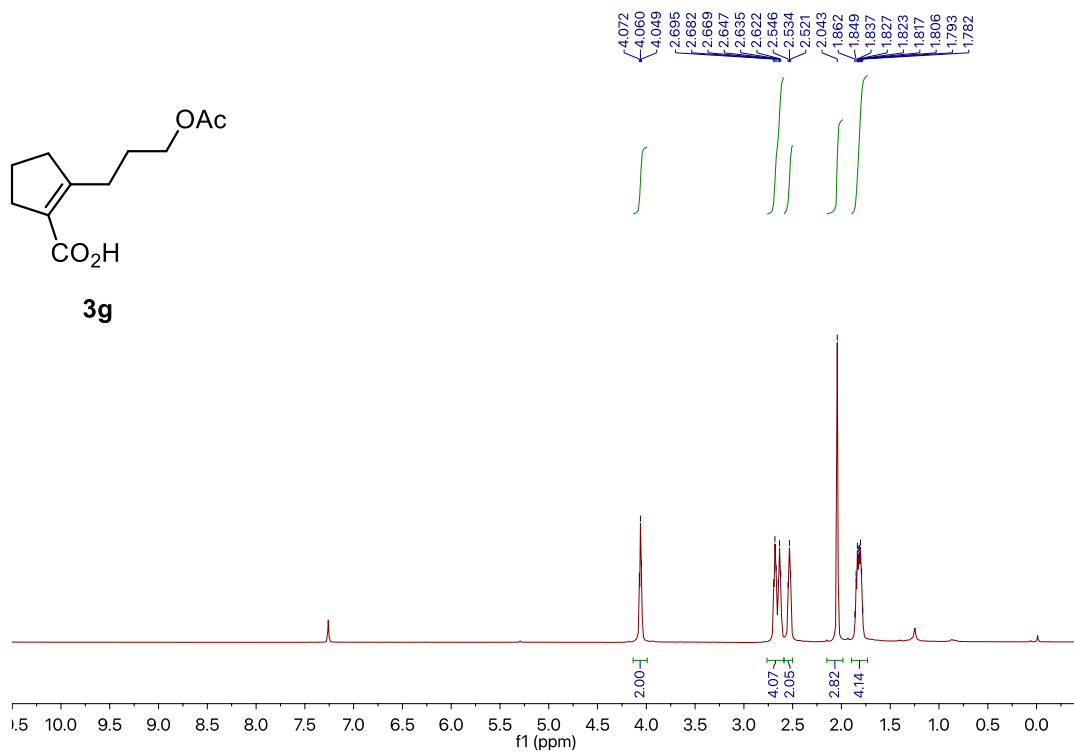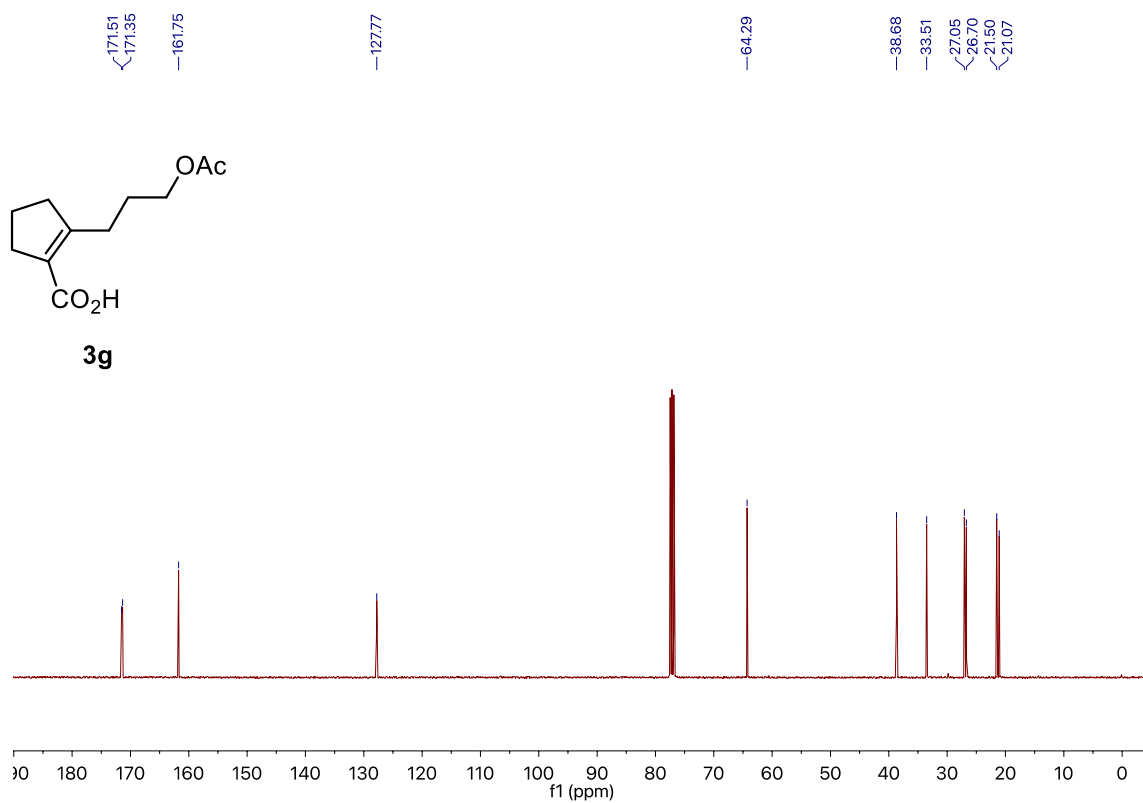

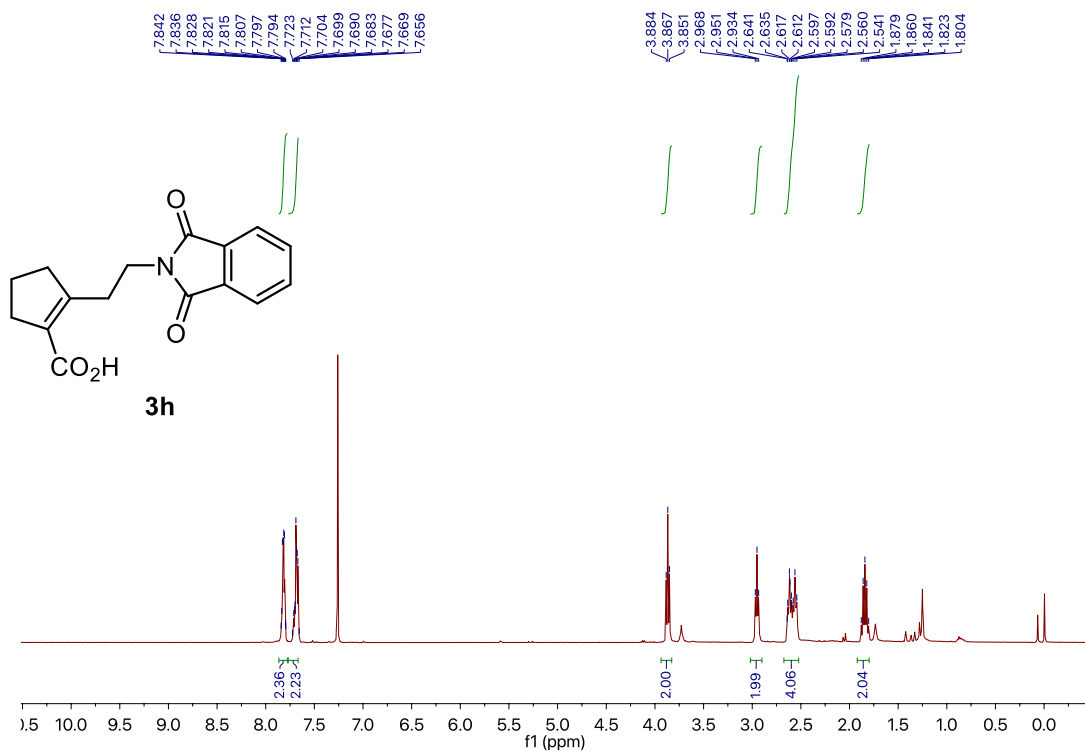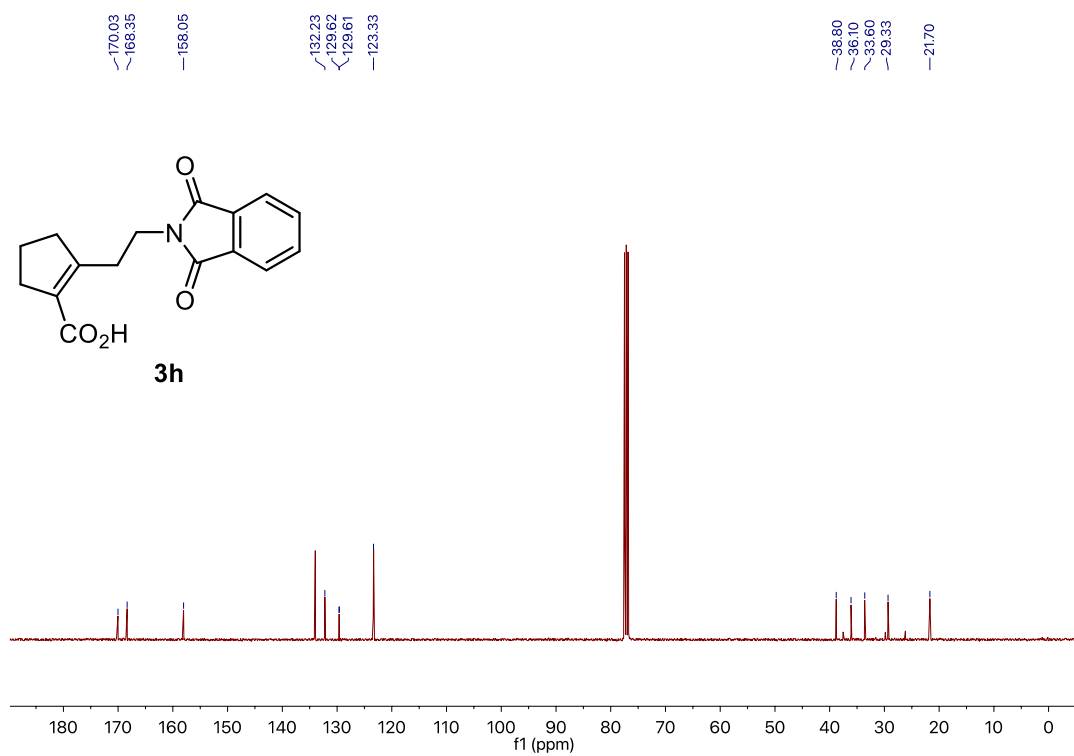

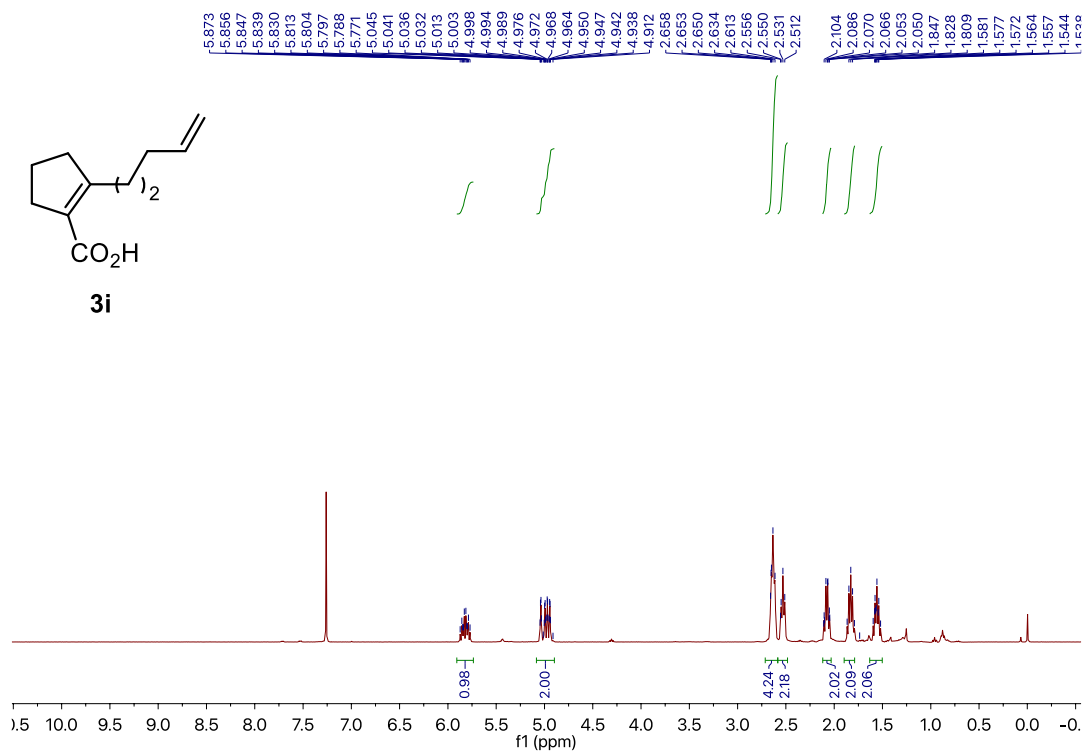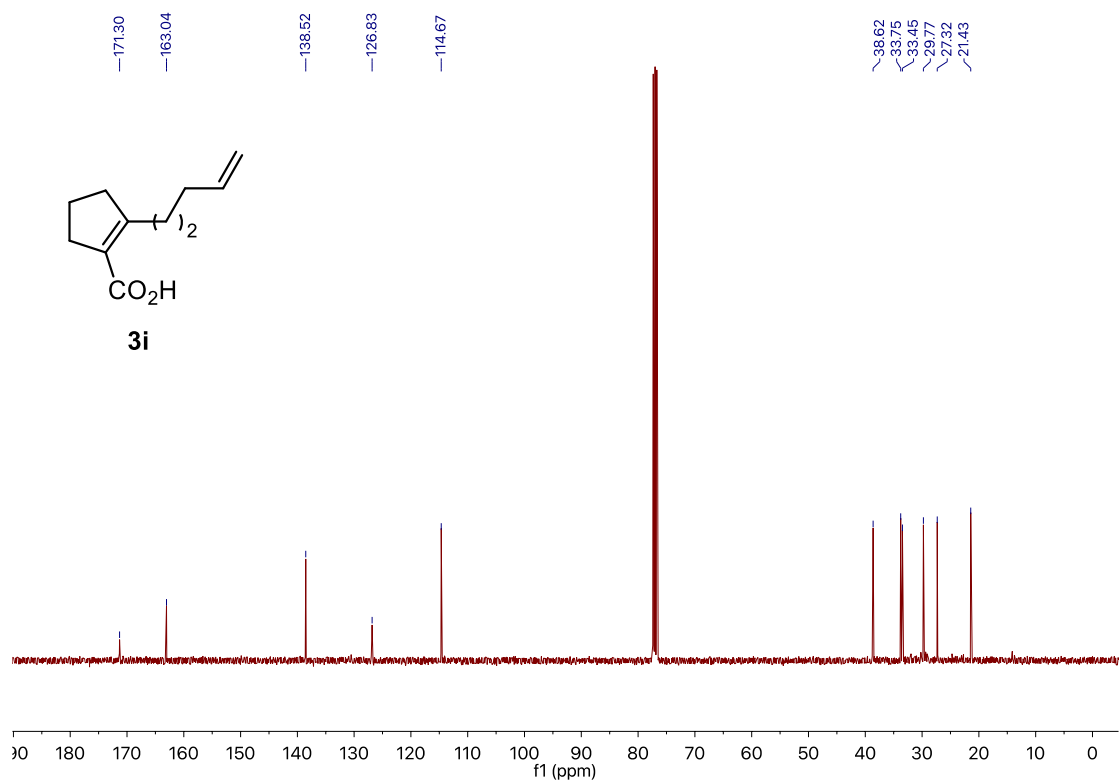

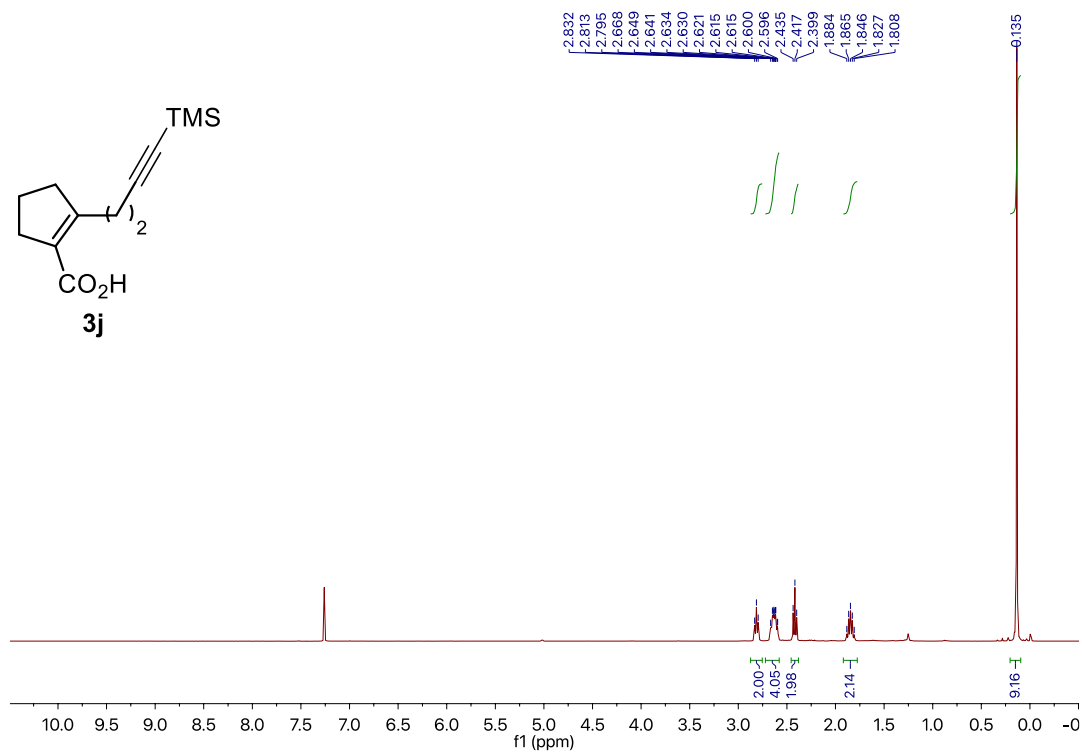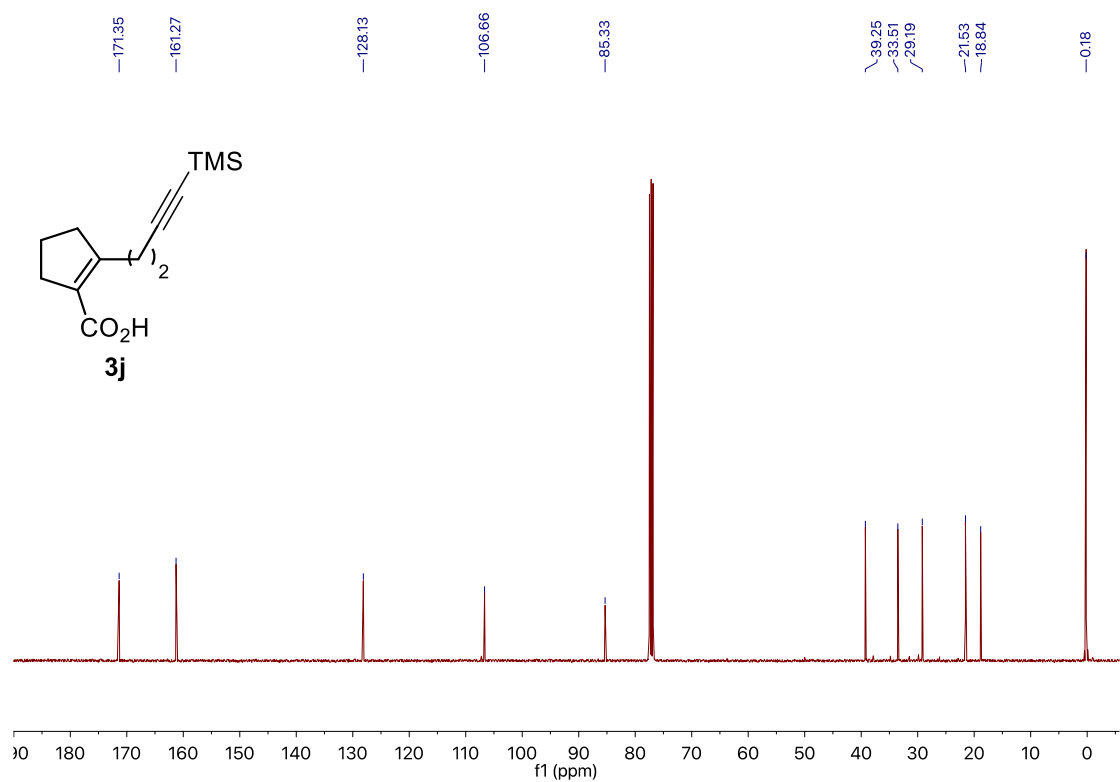

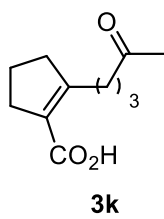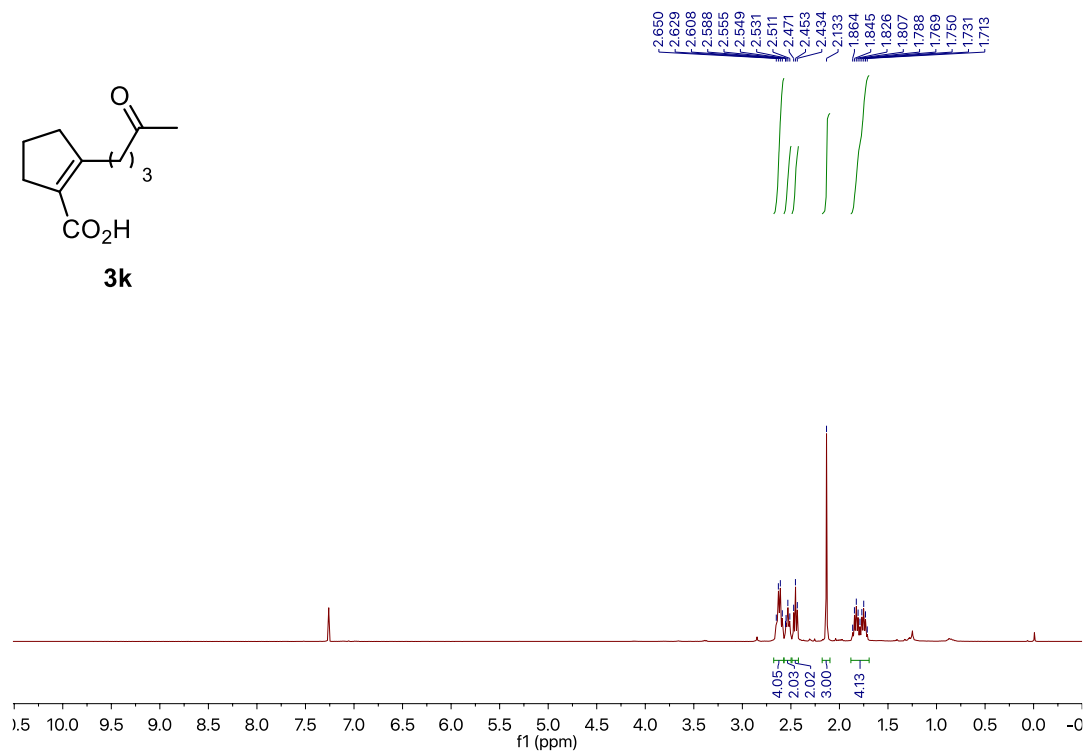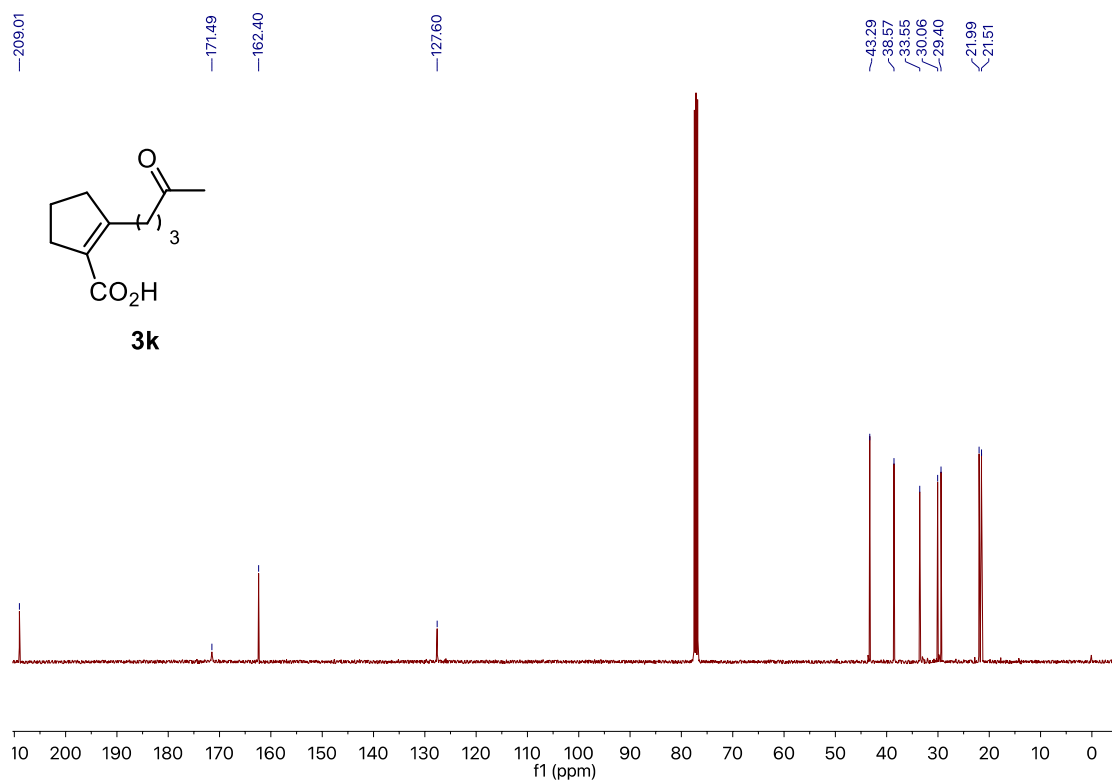

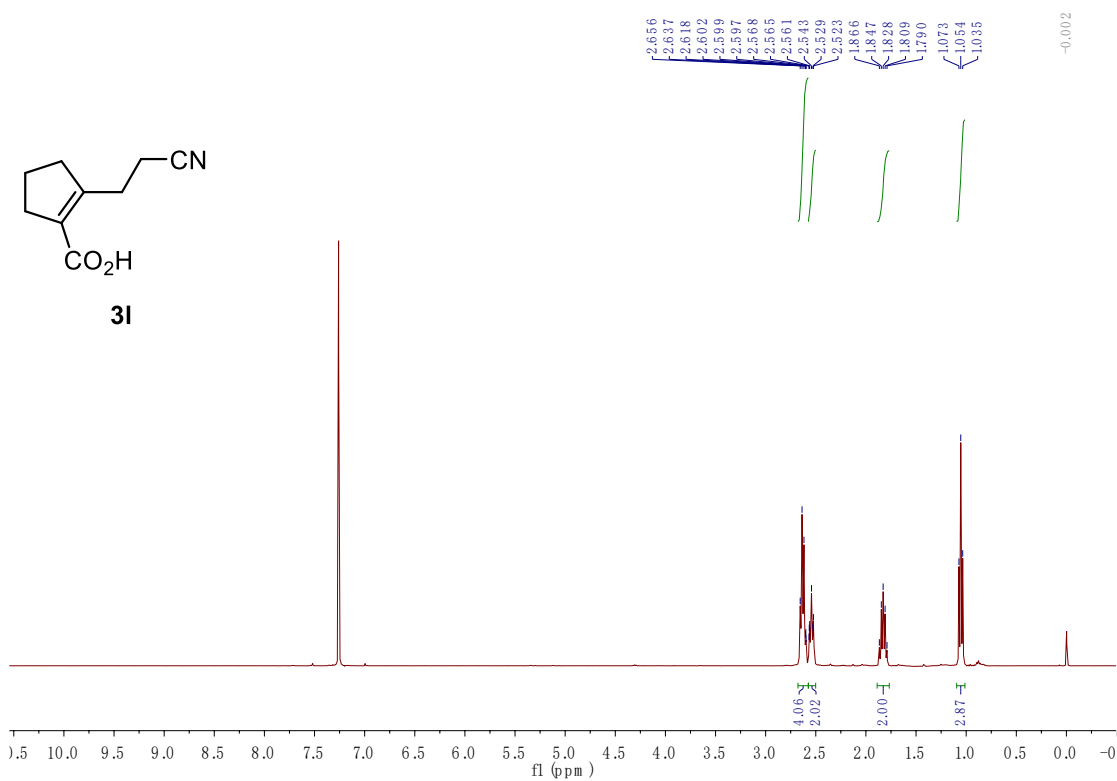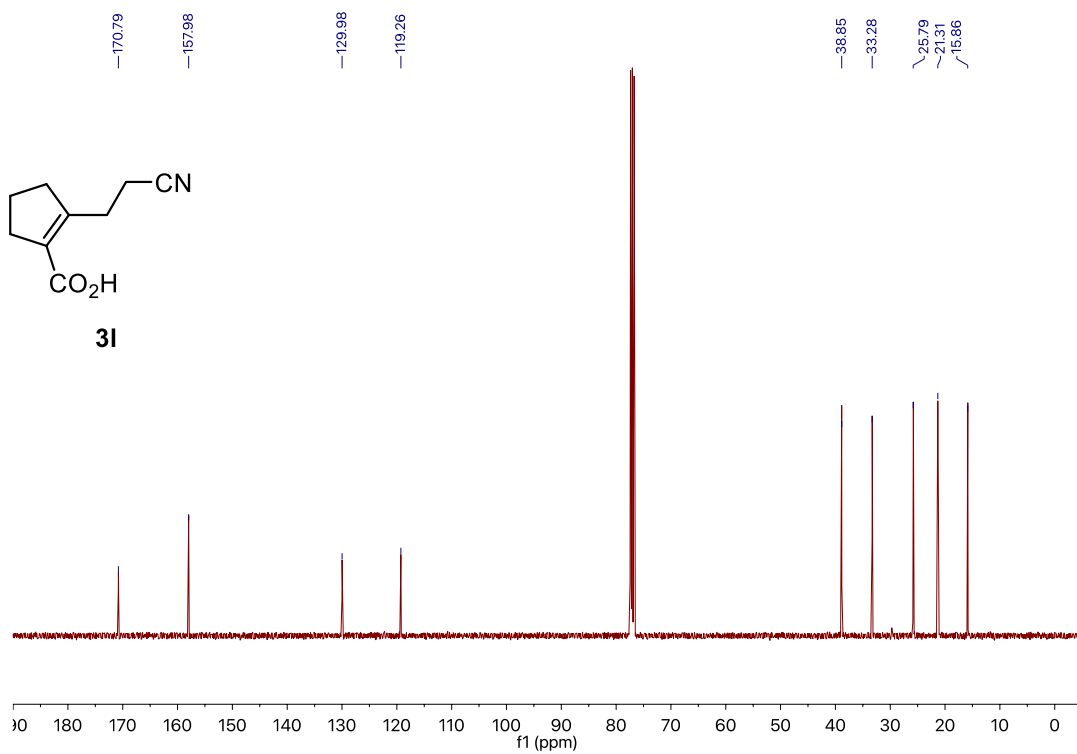

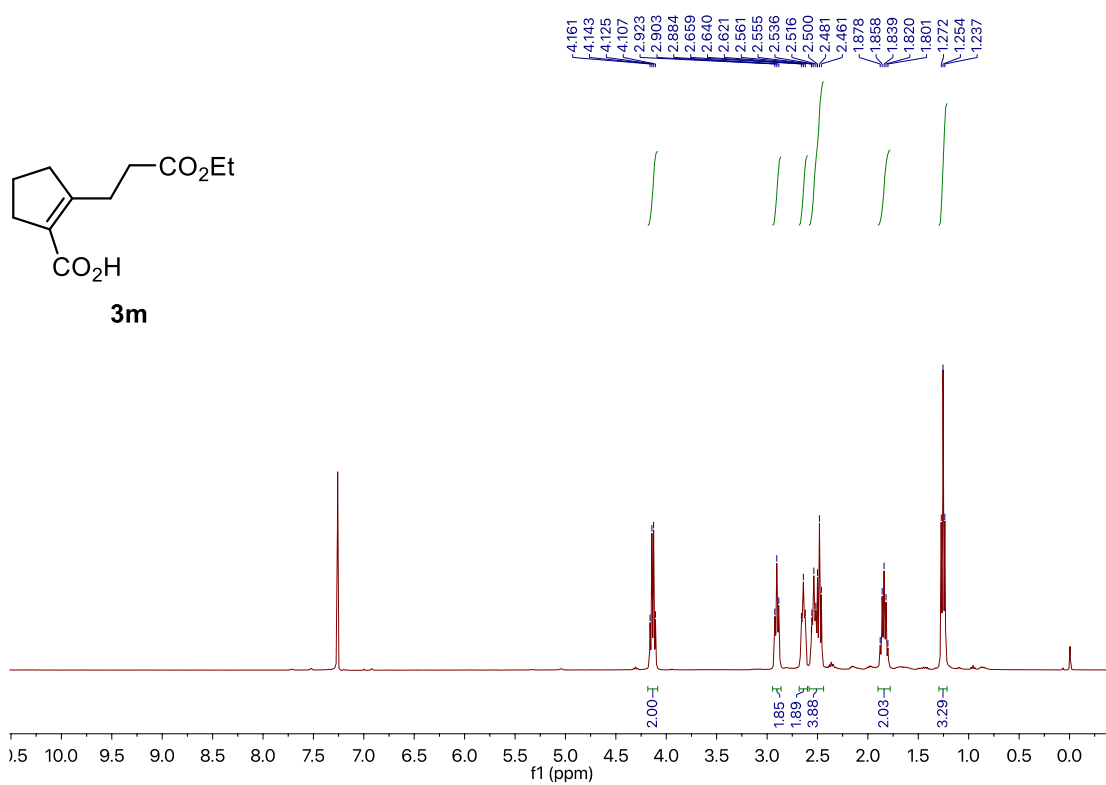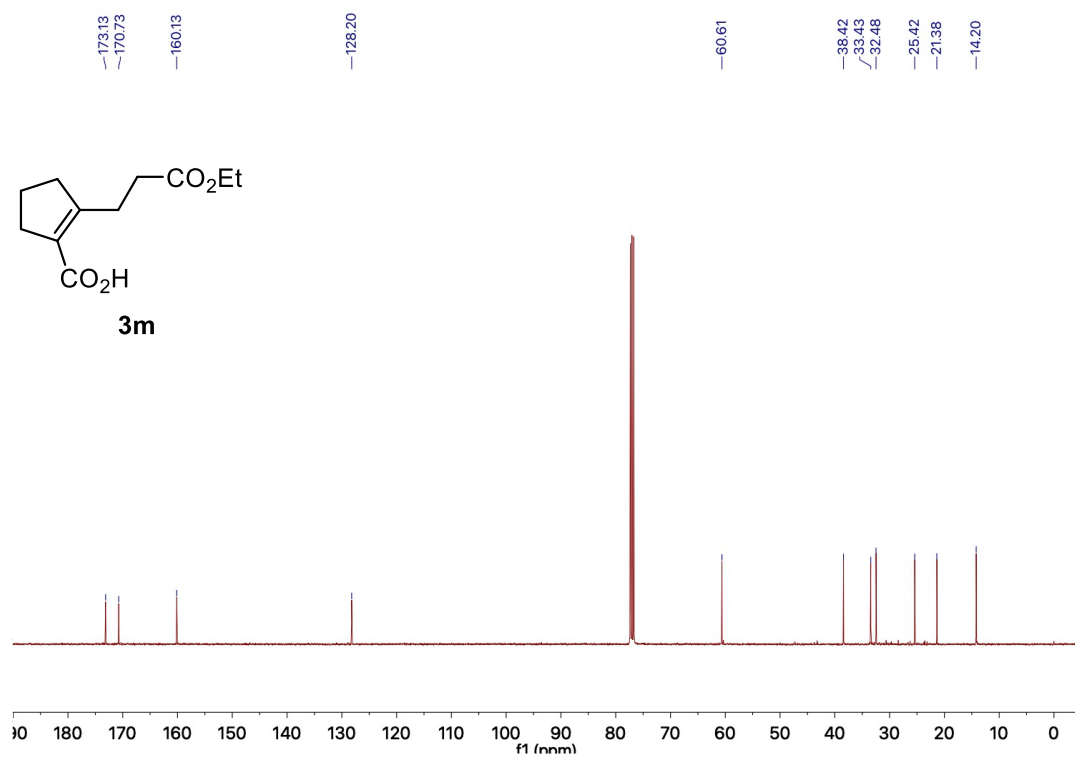

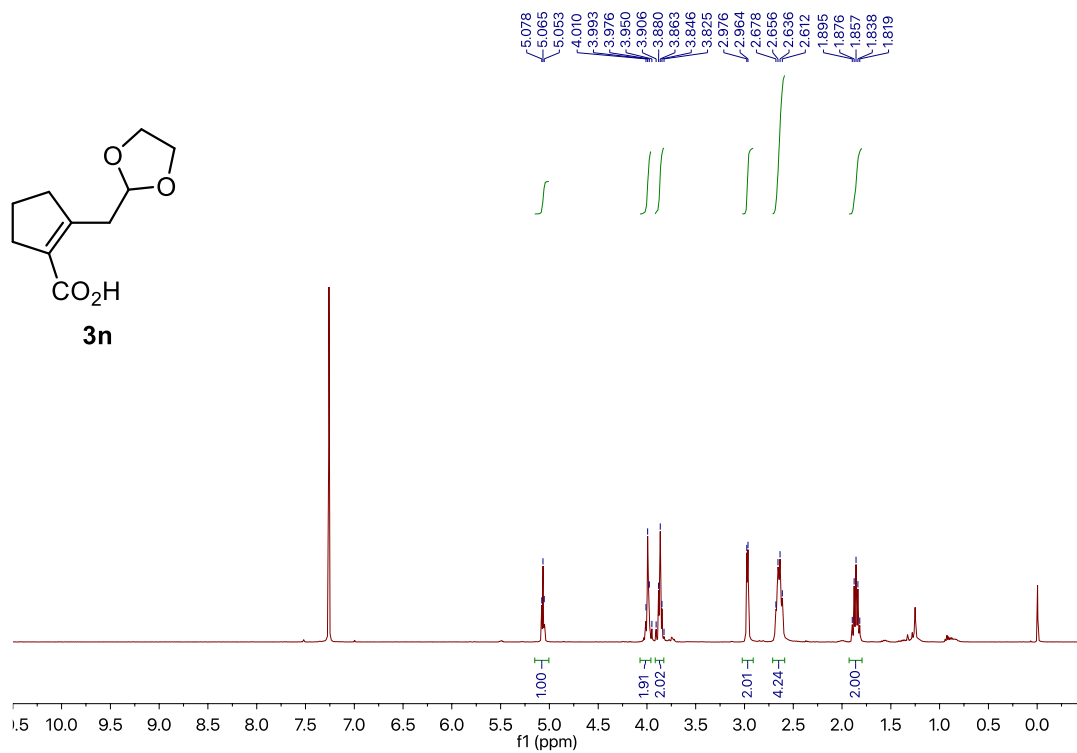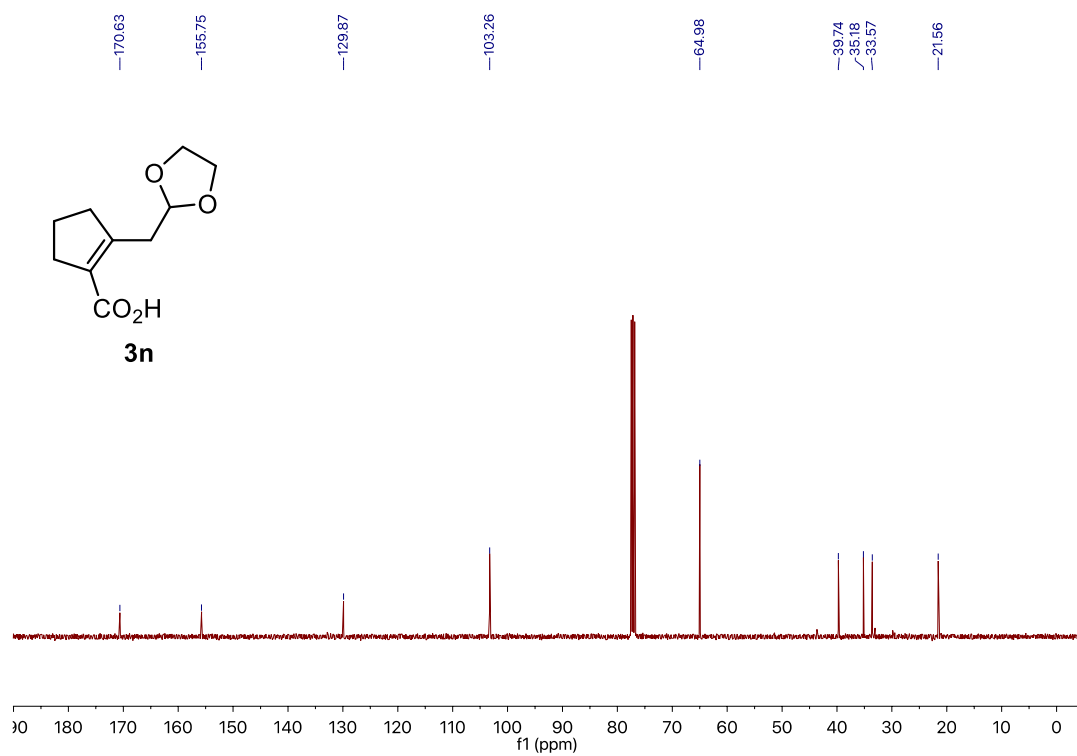

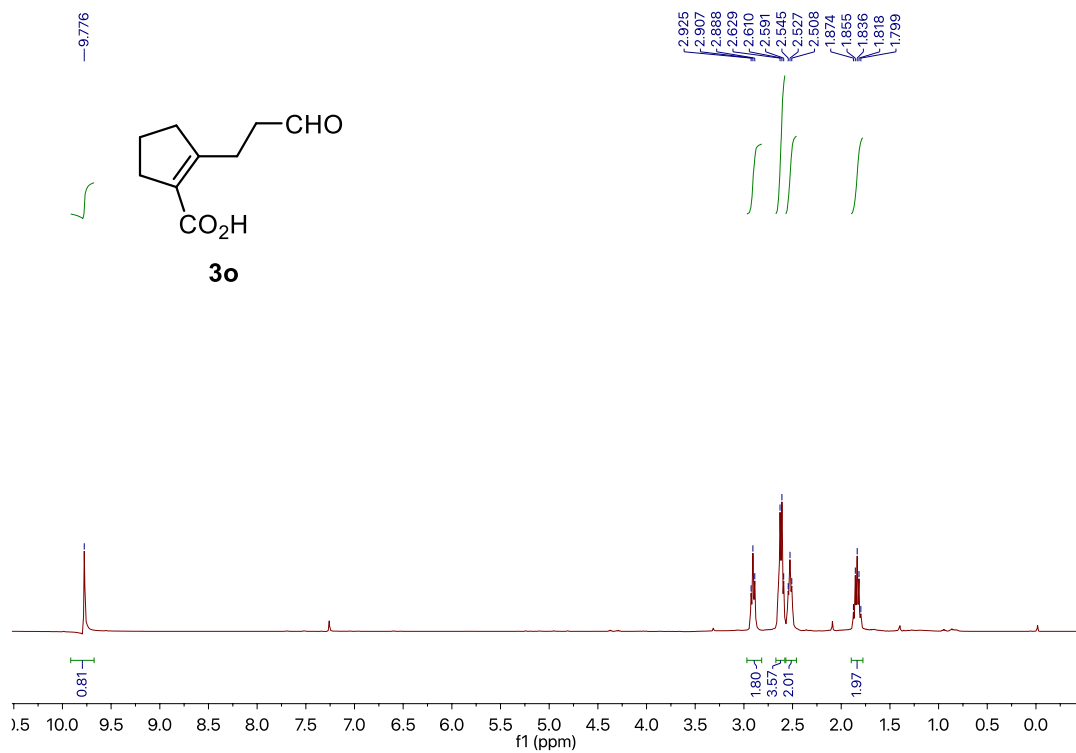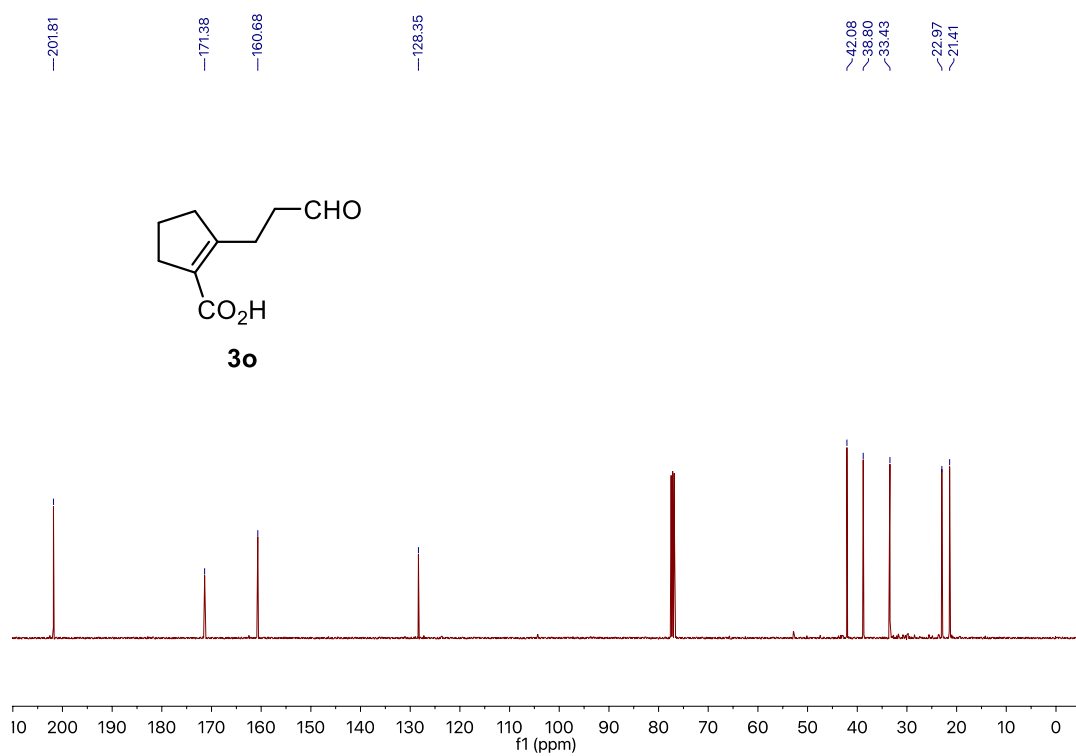

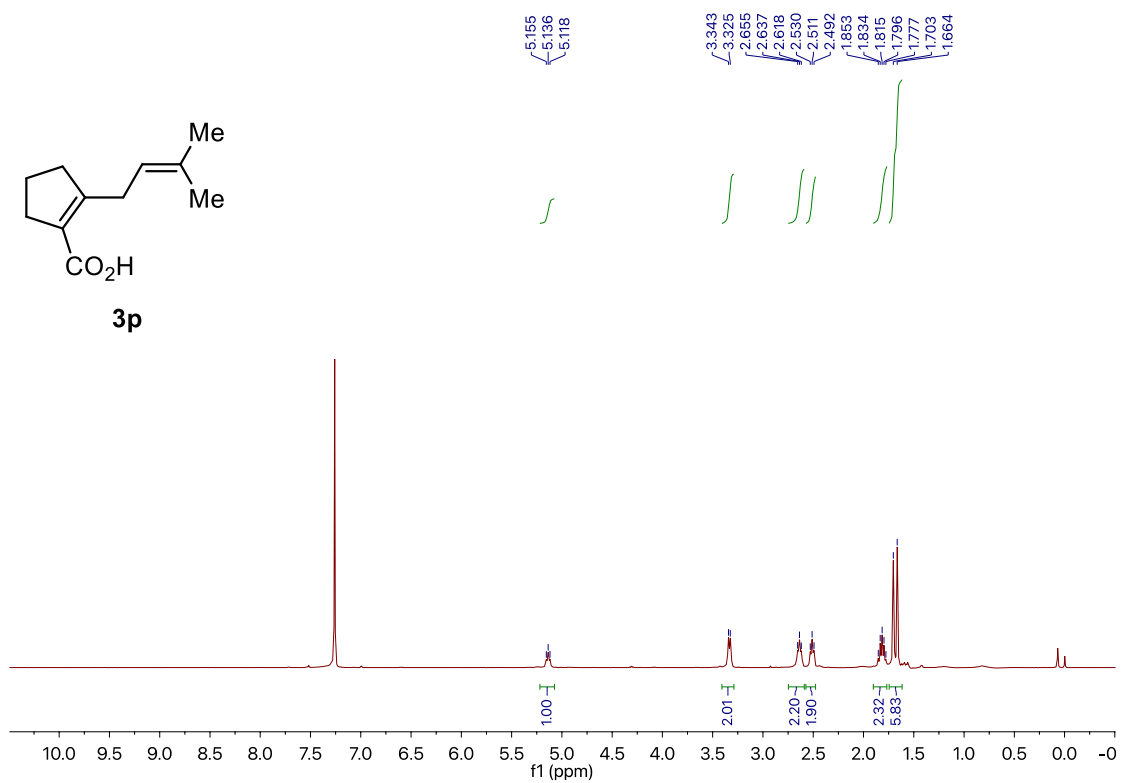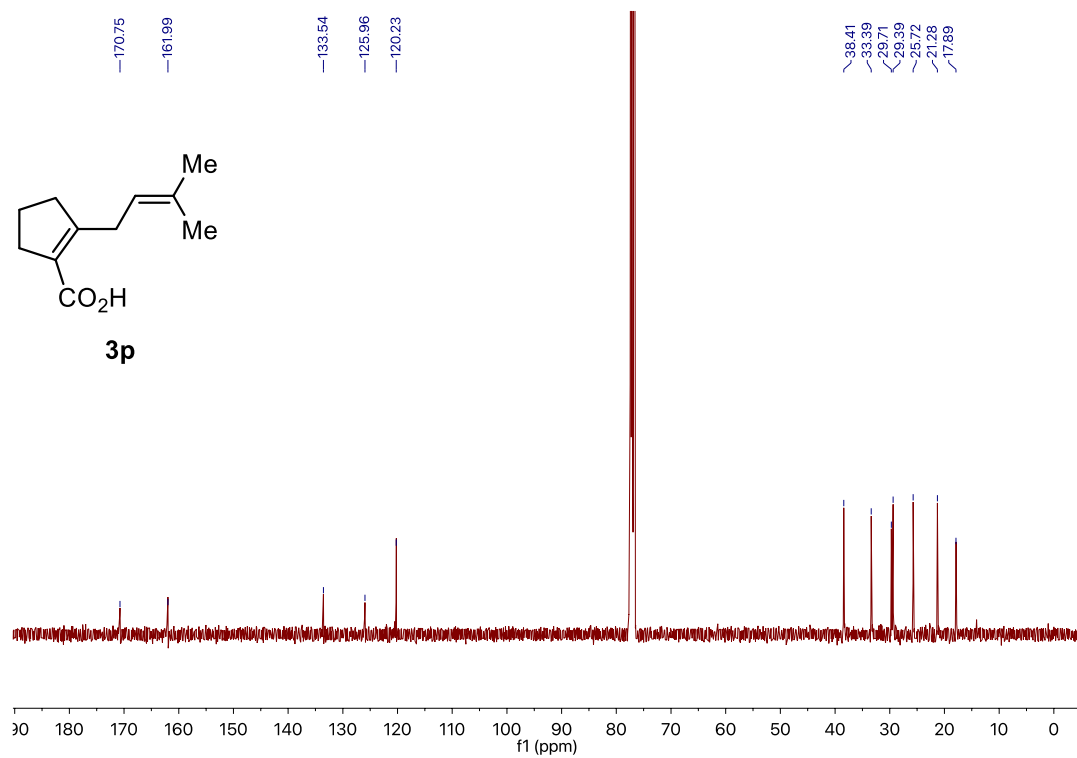

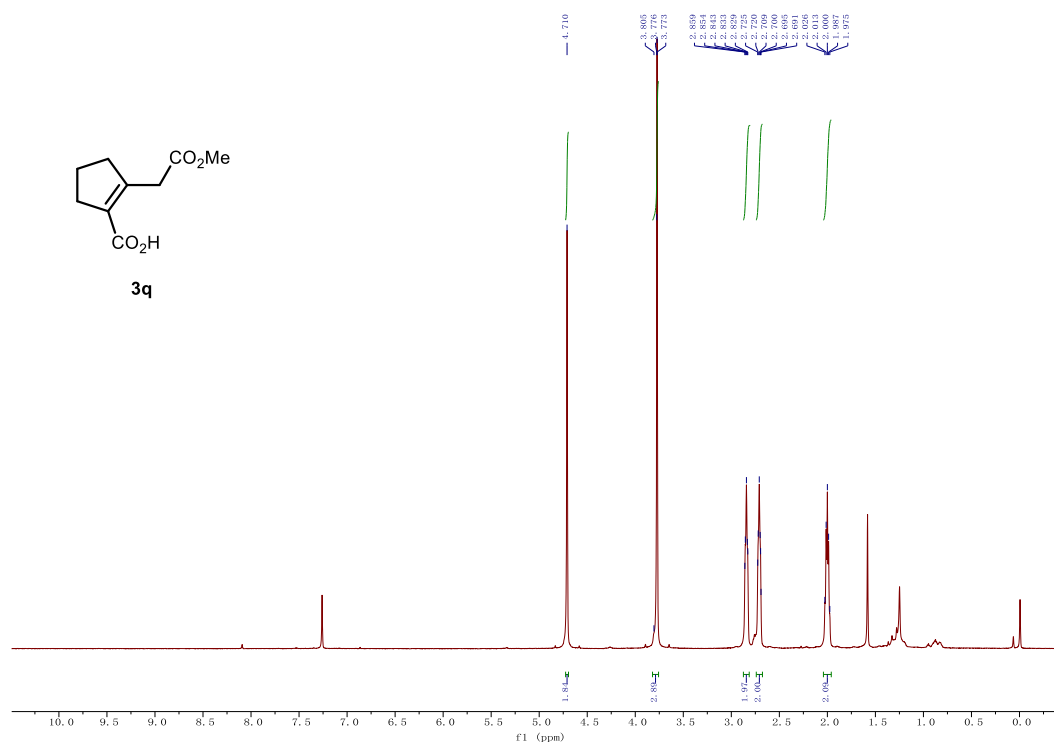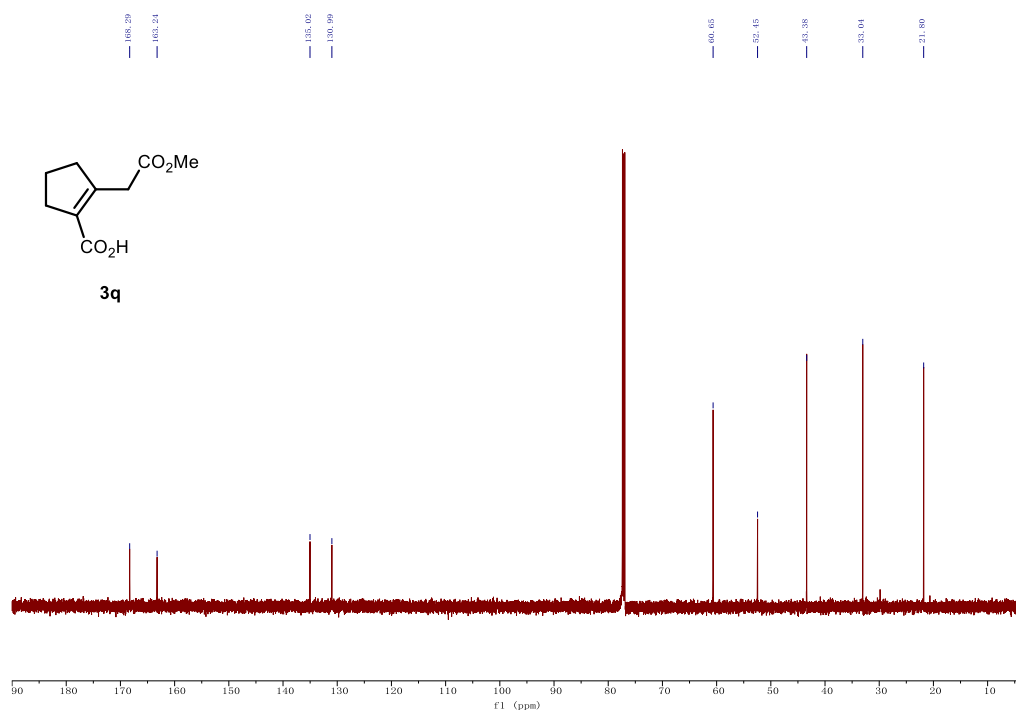

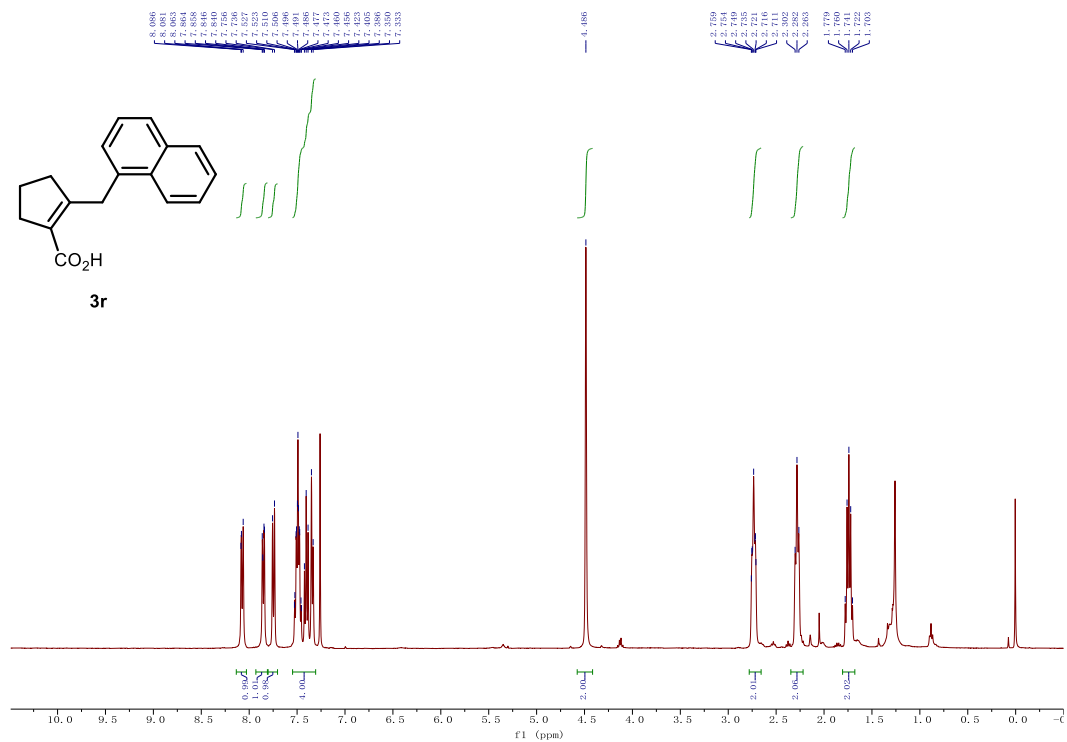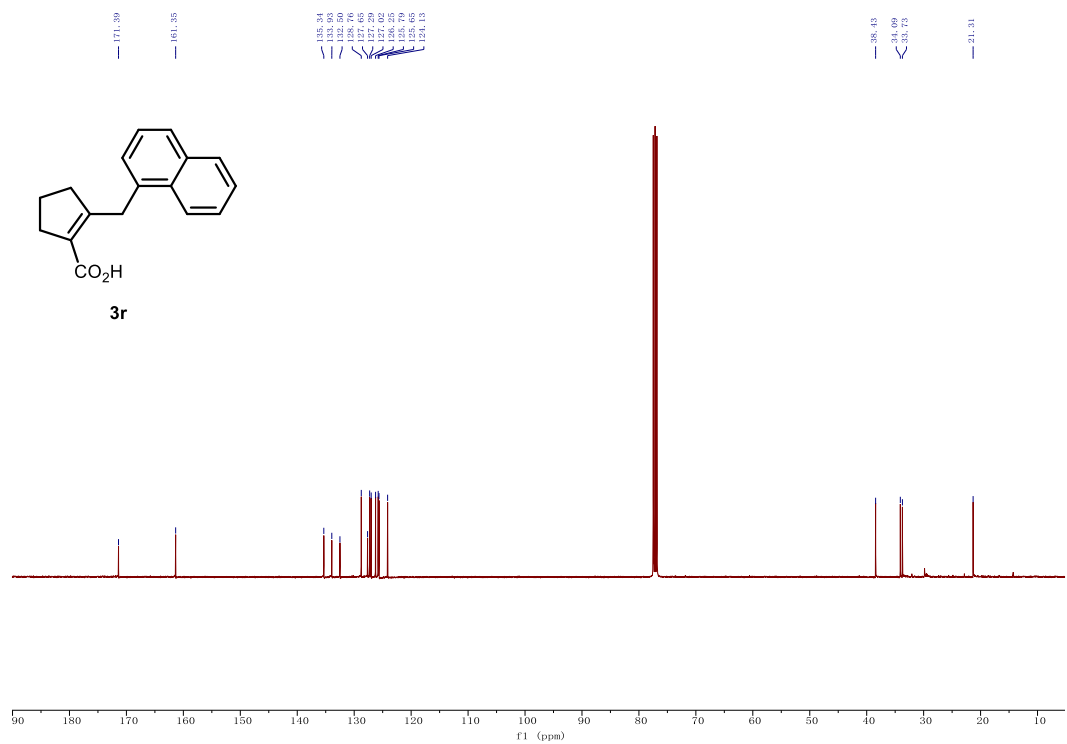

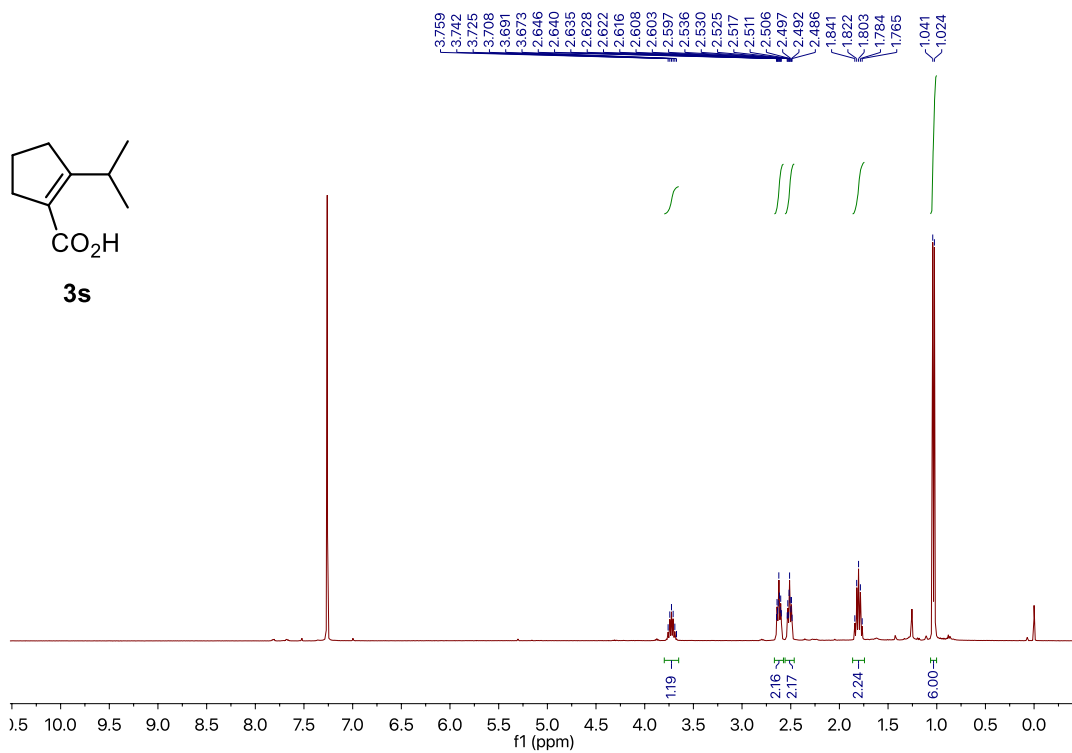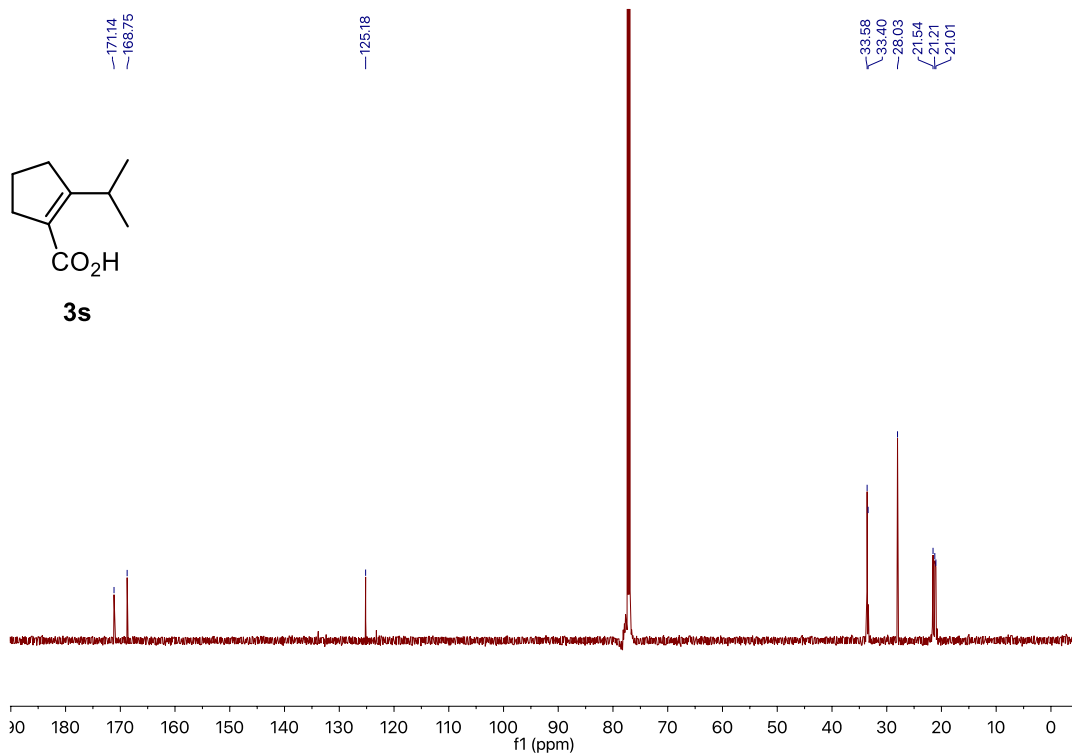

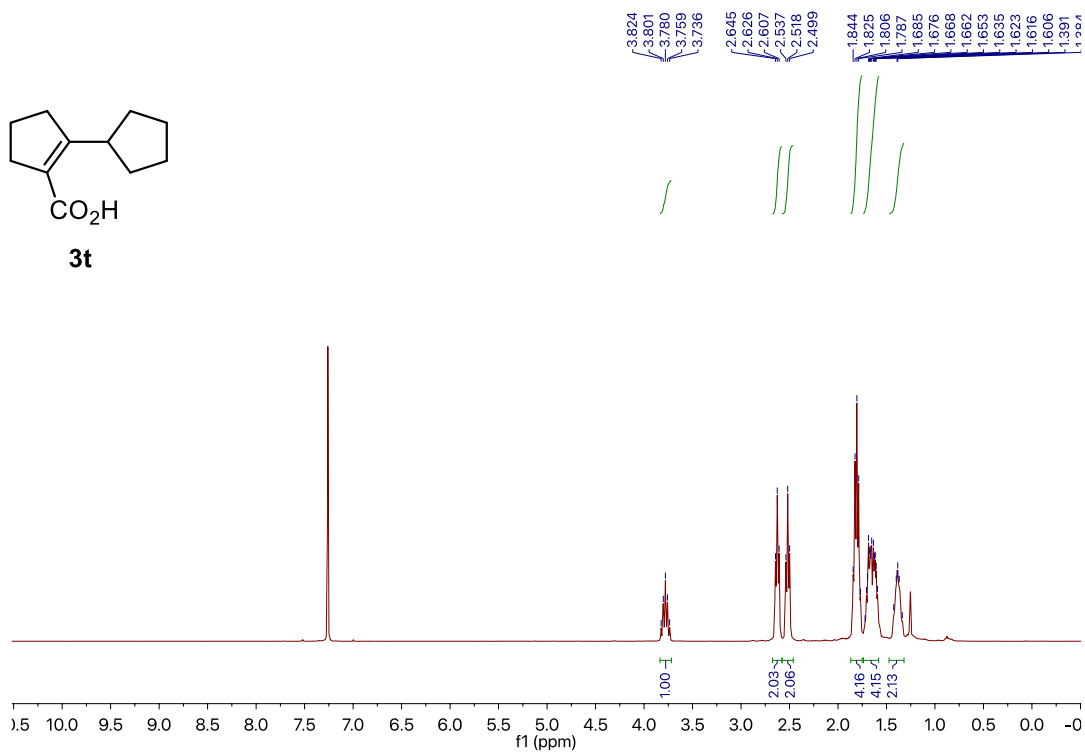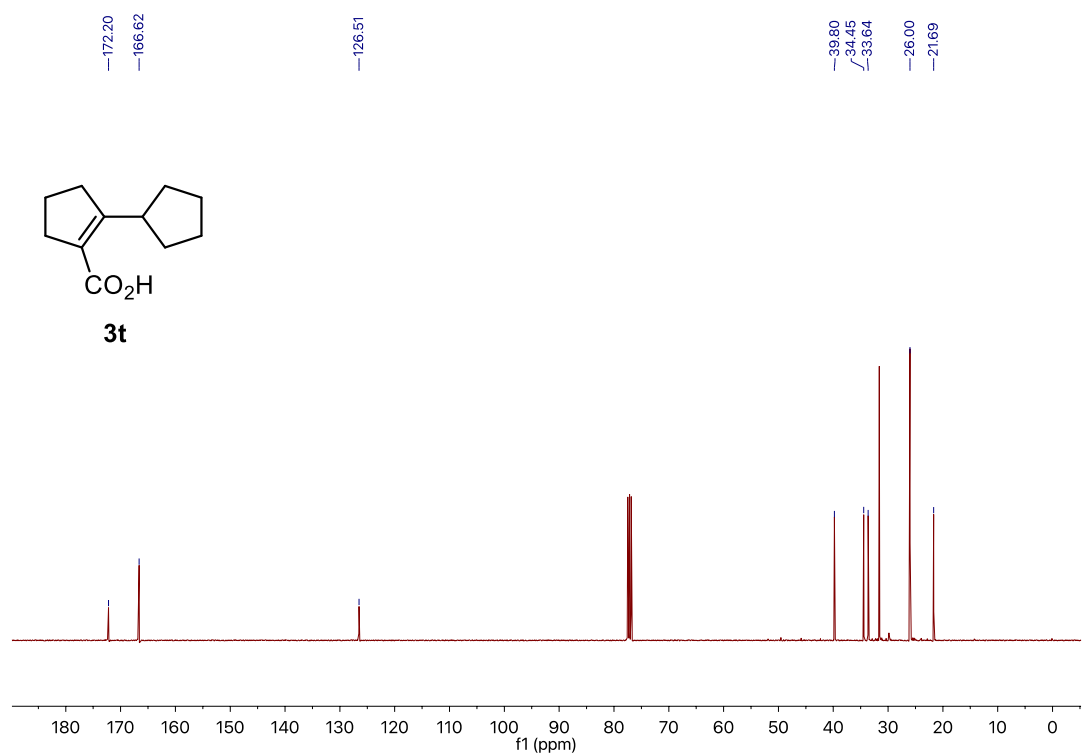

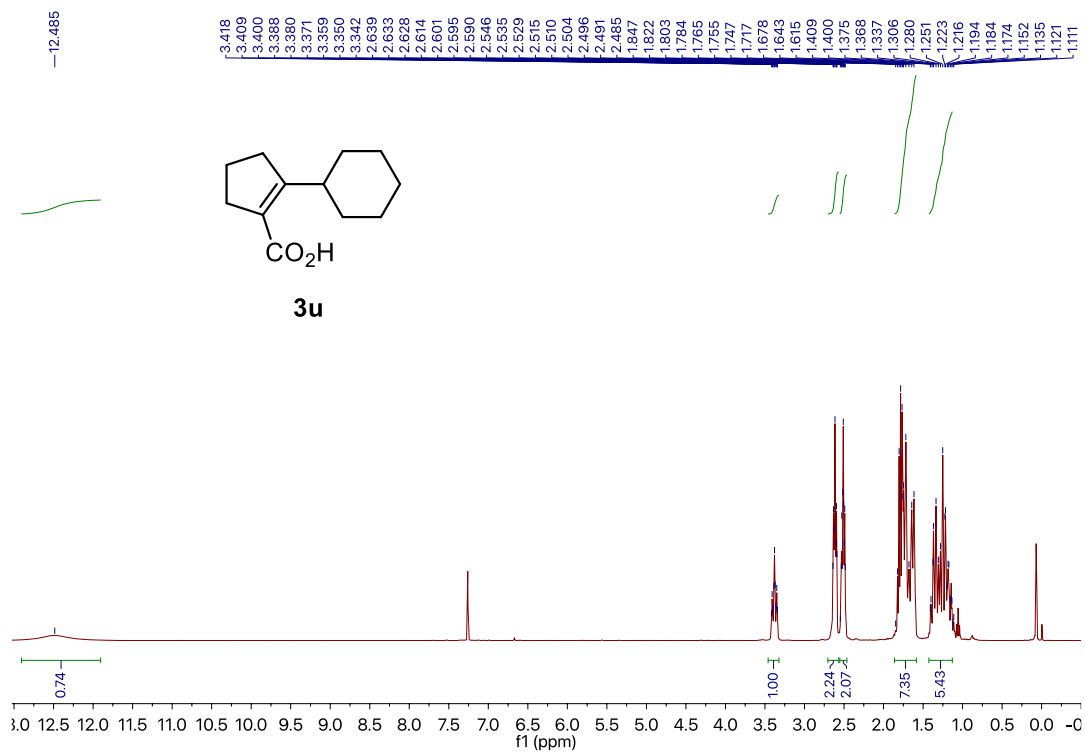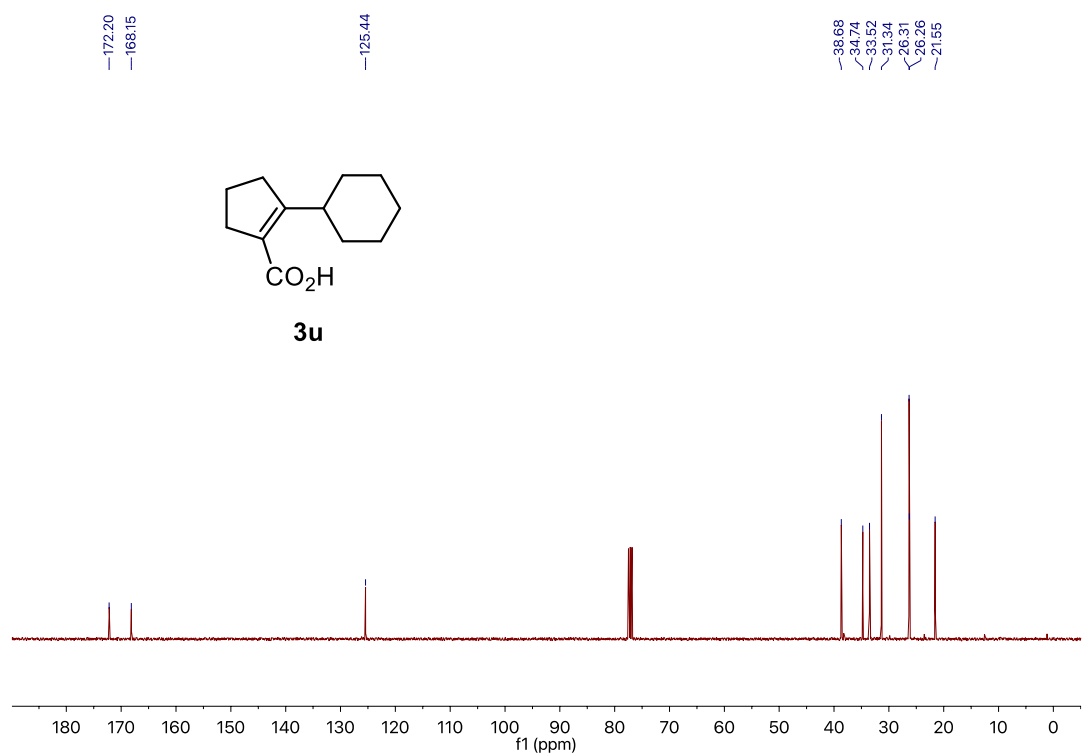

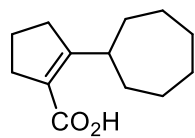

**3v**

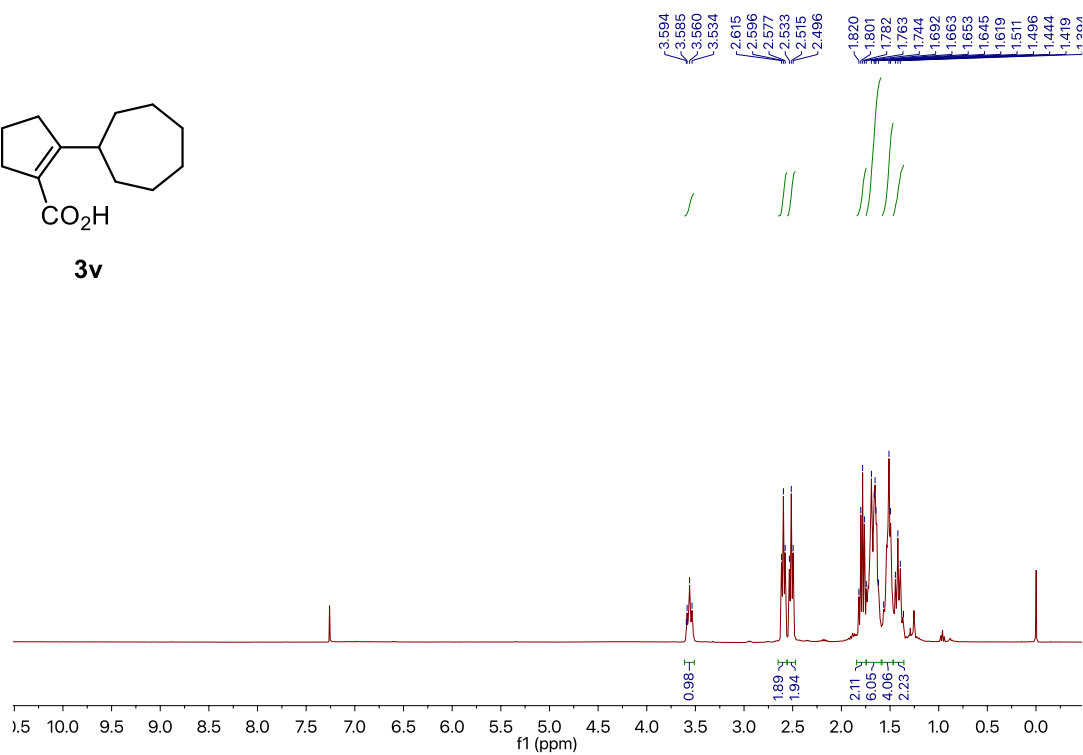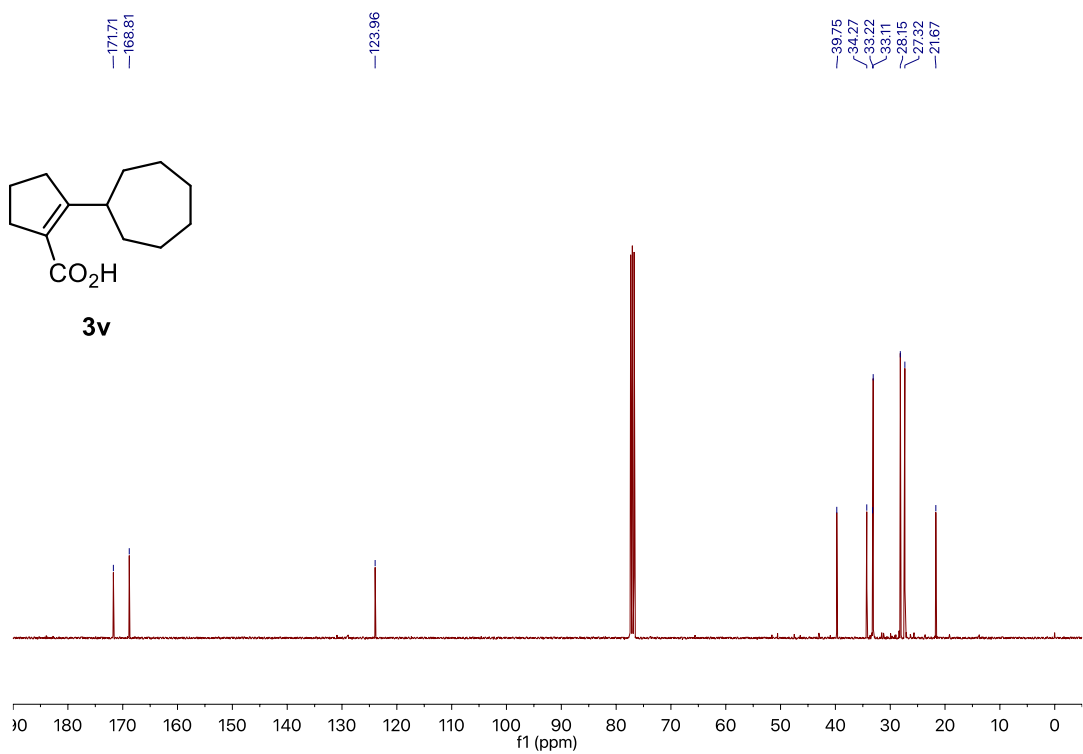

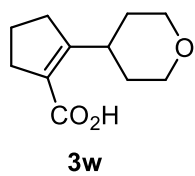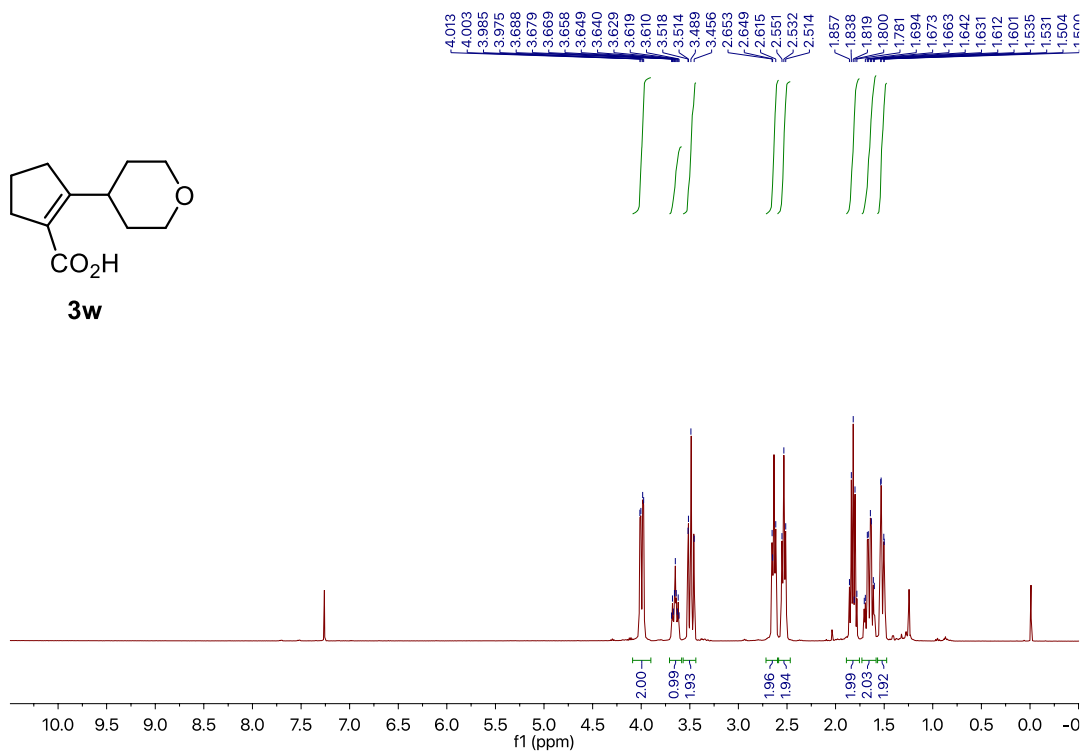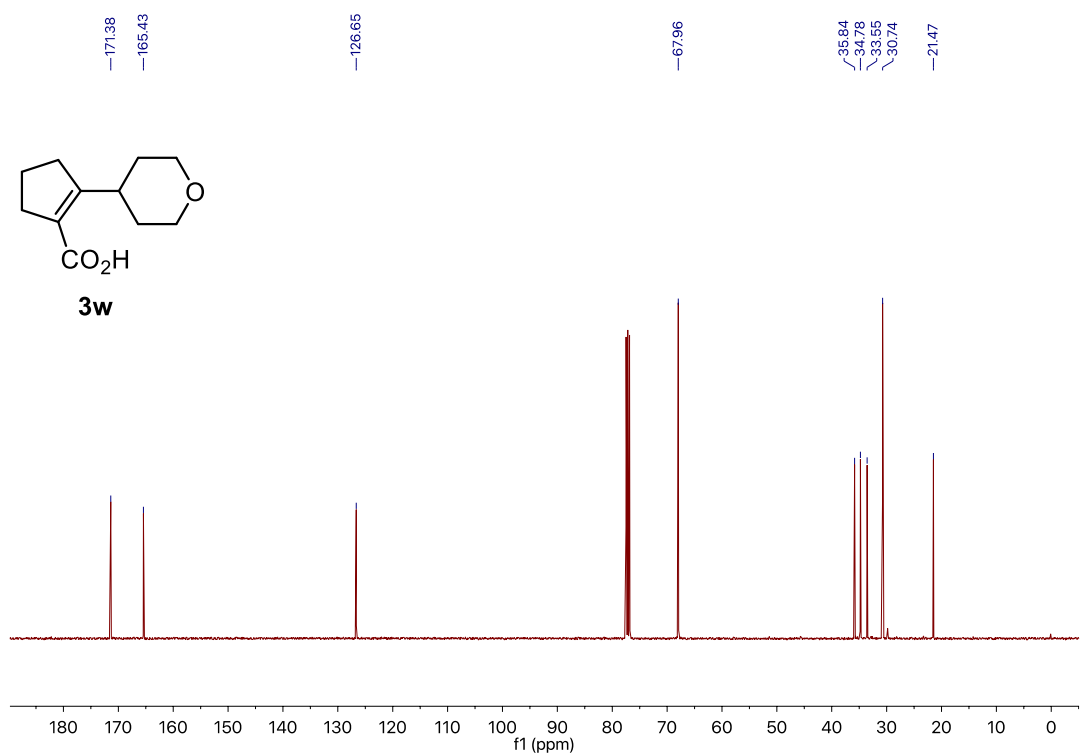

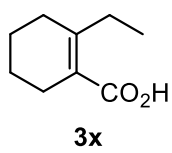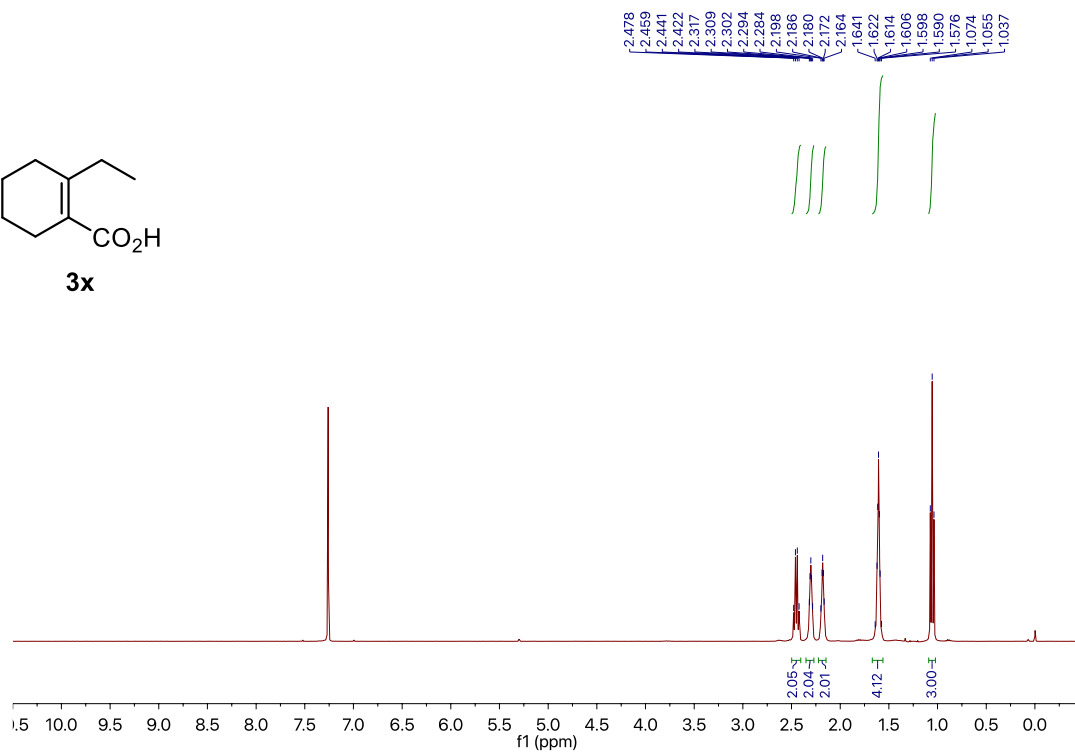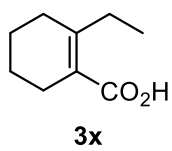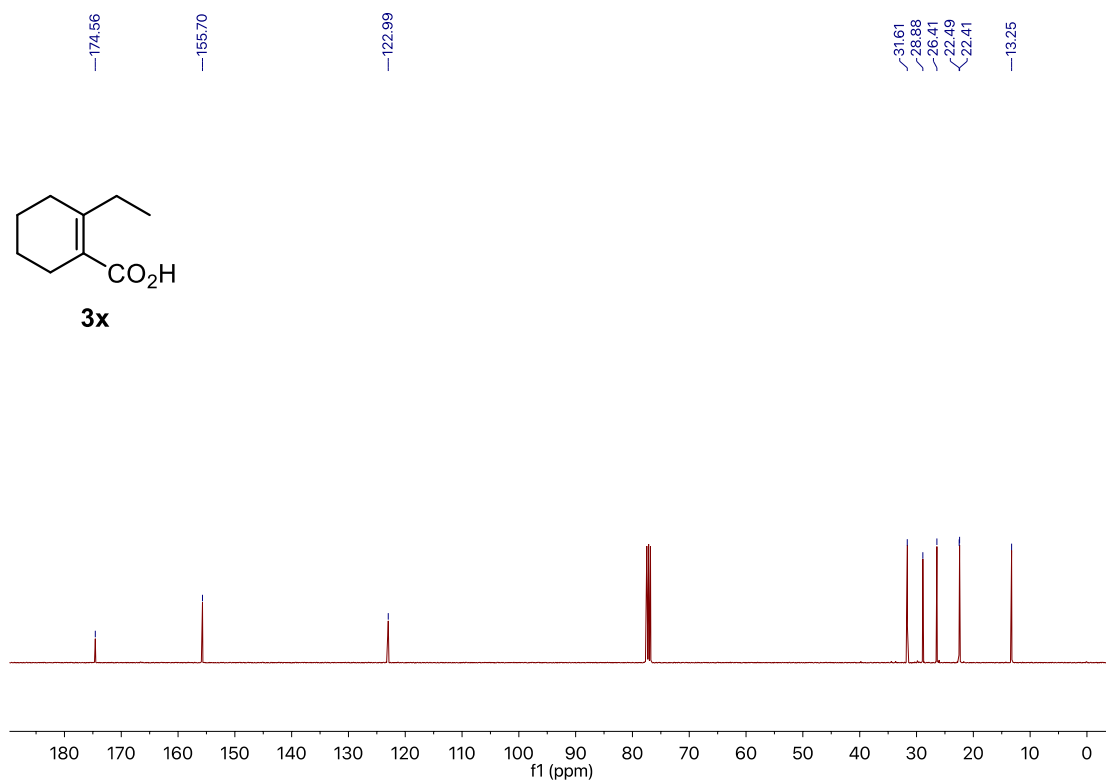

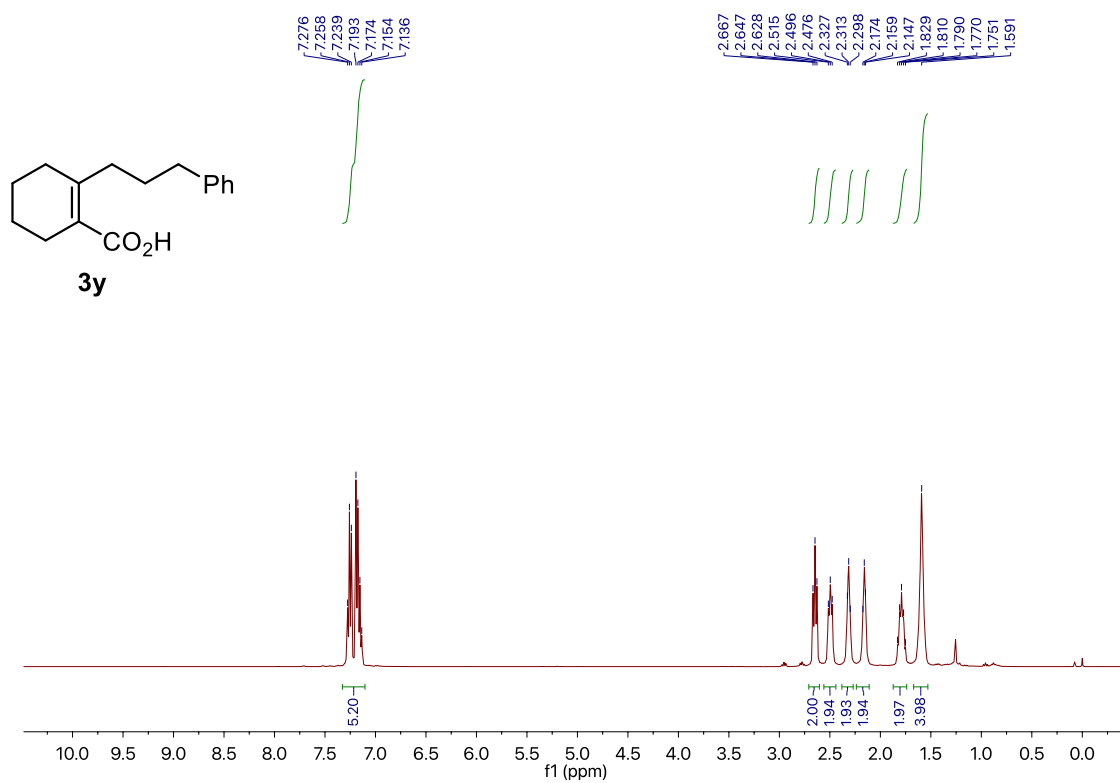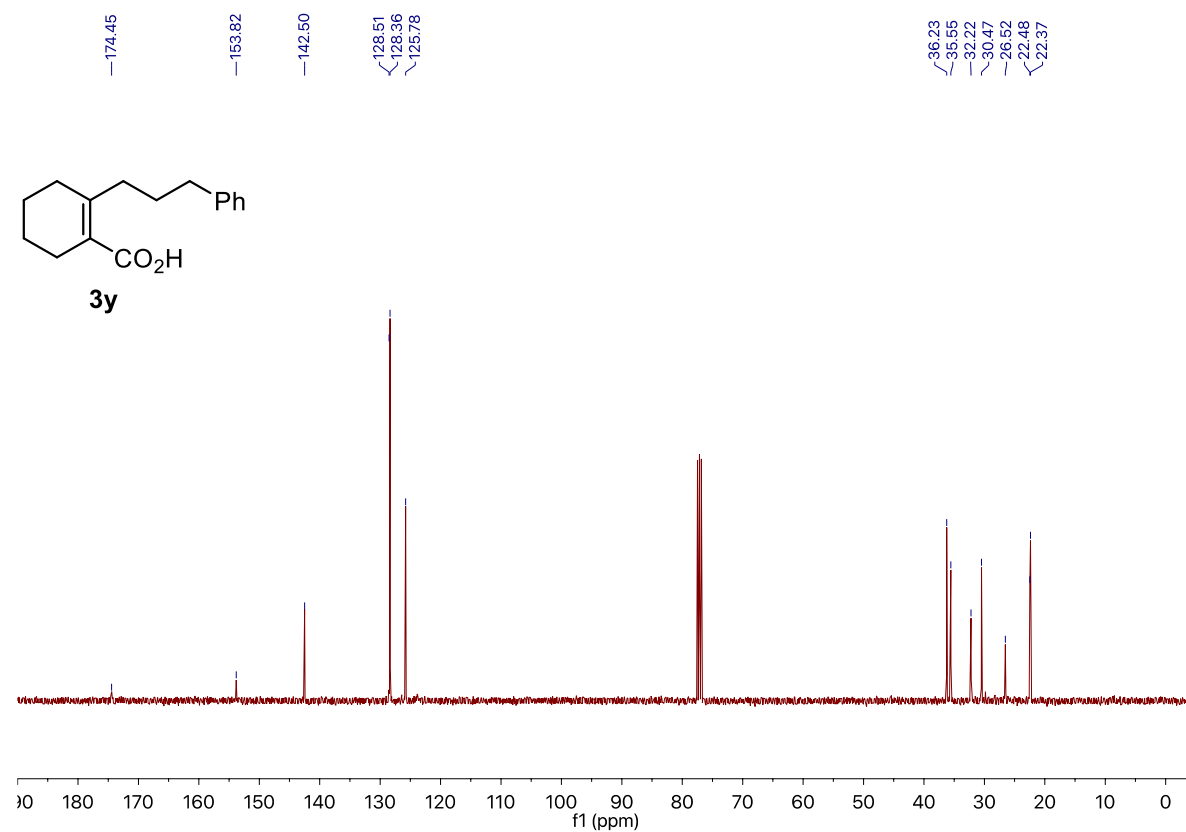

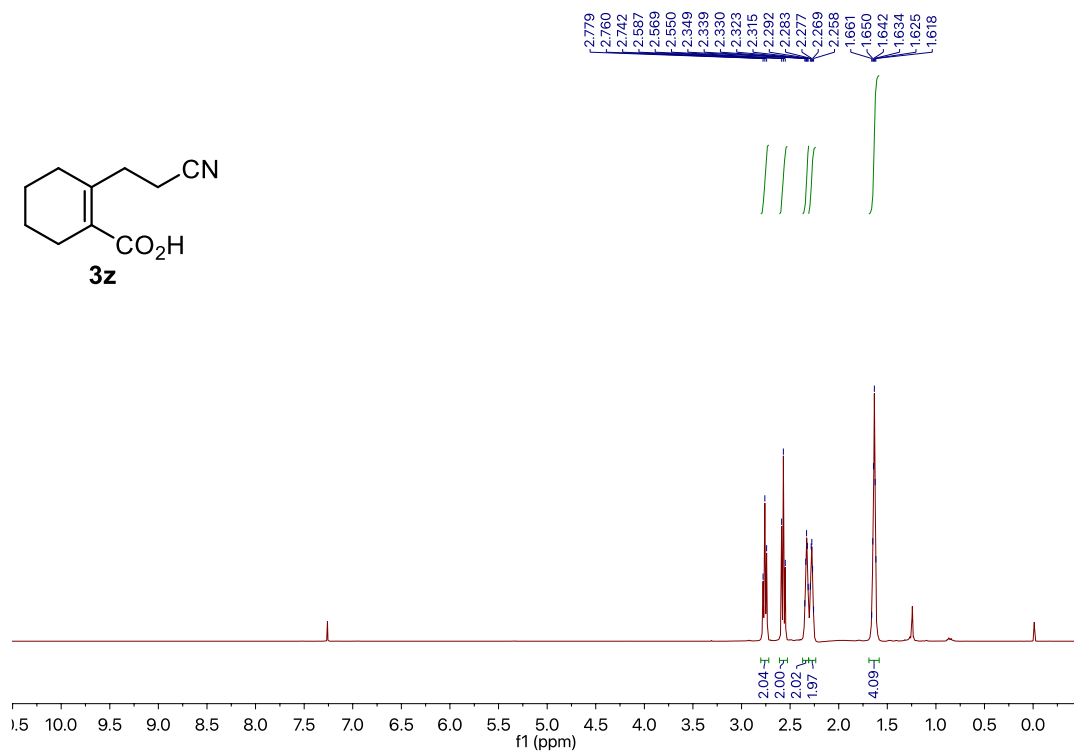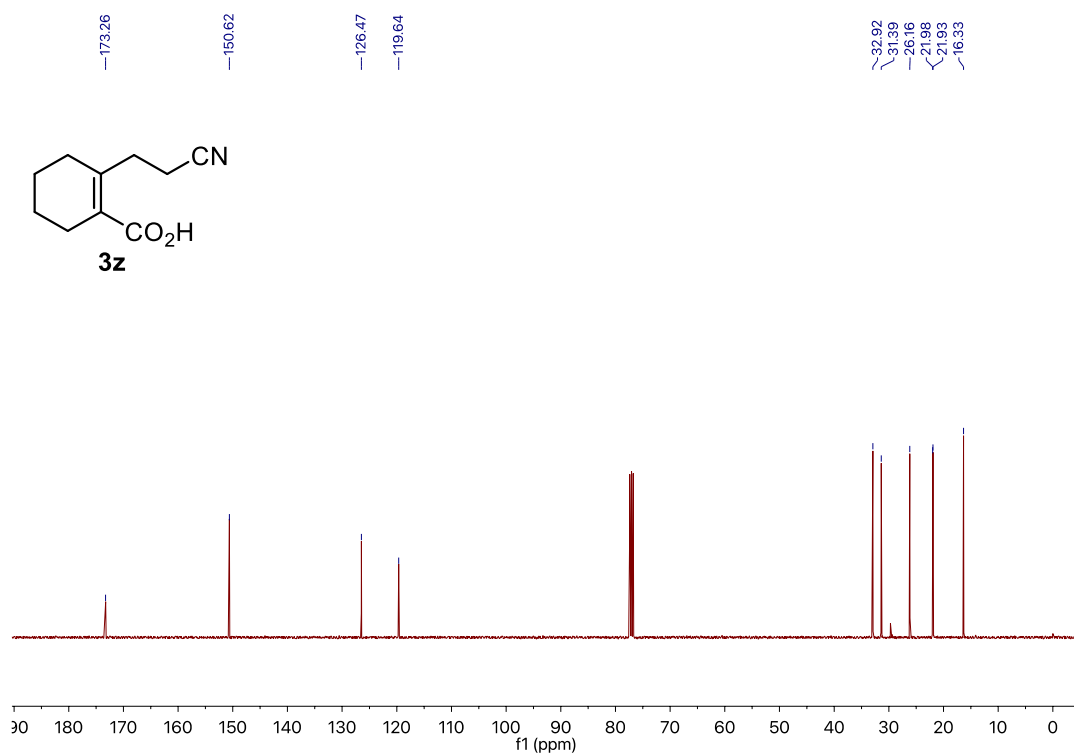

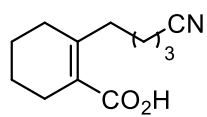

**3aa**

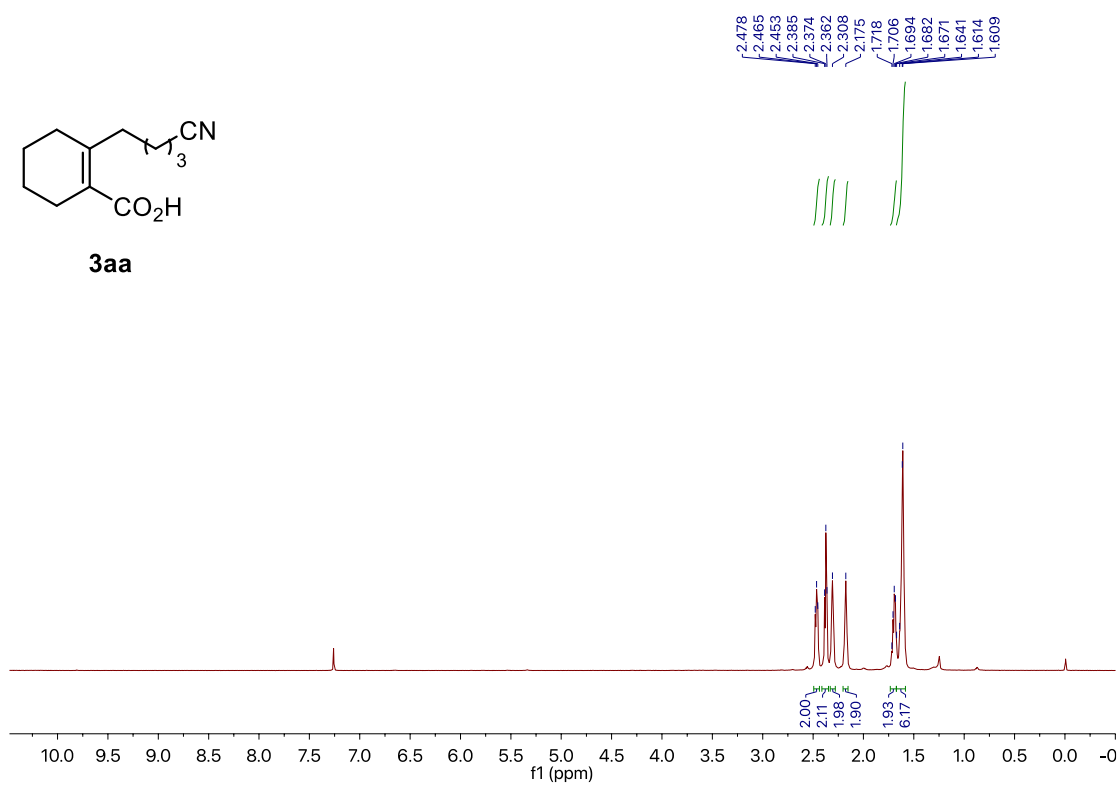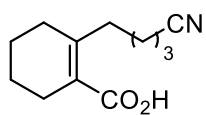

**3aa**

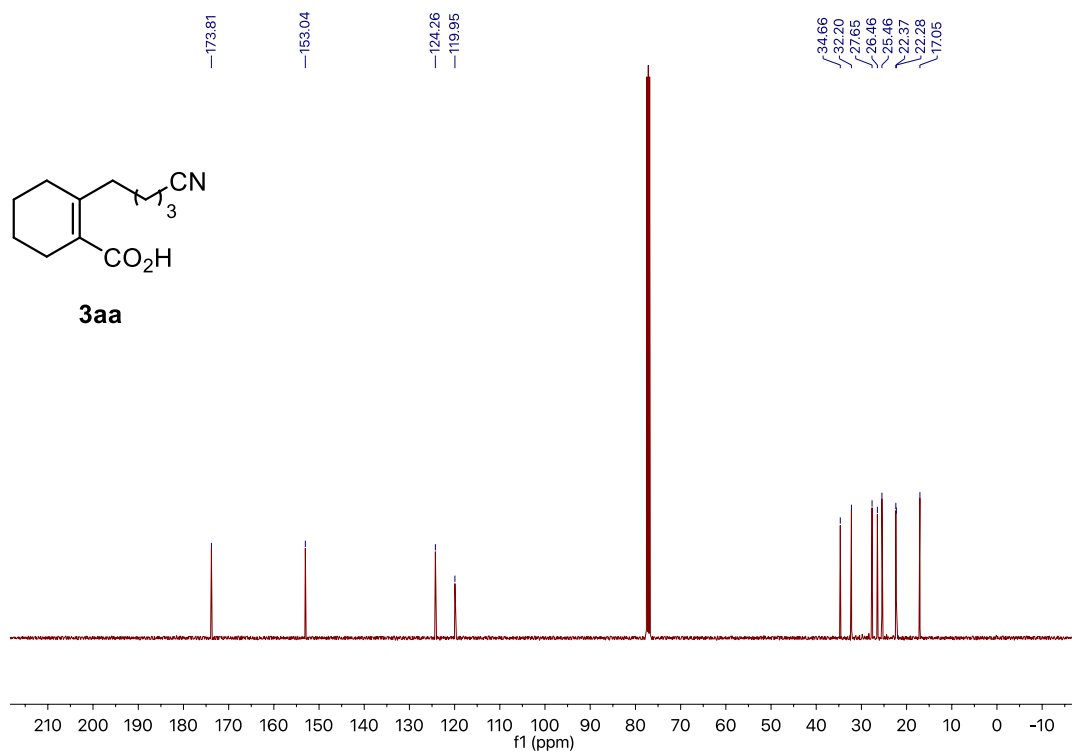

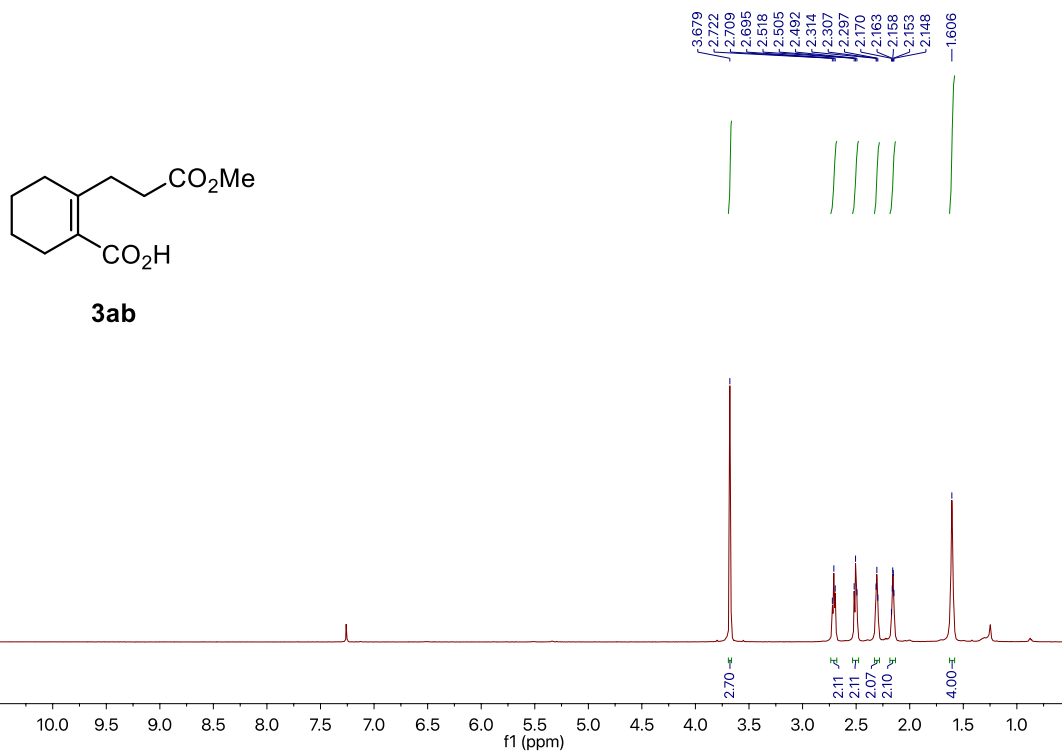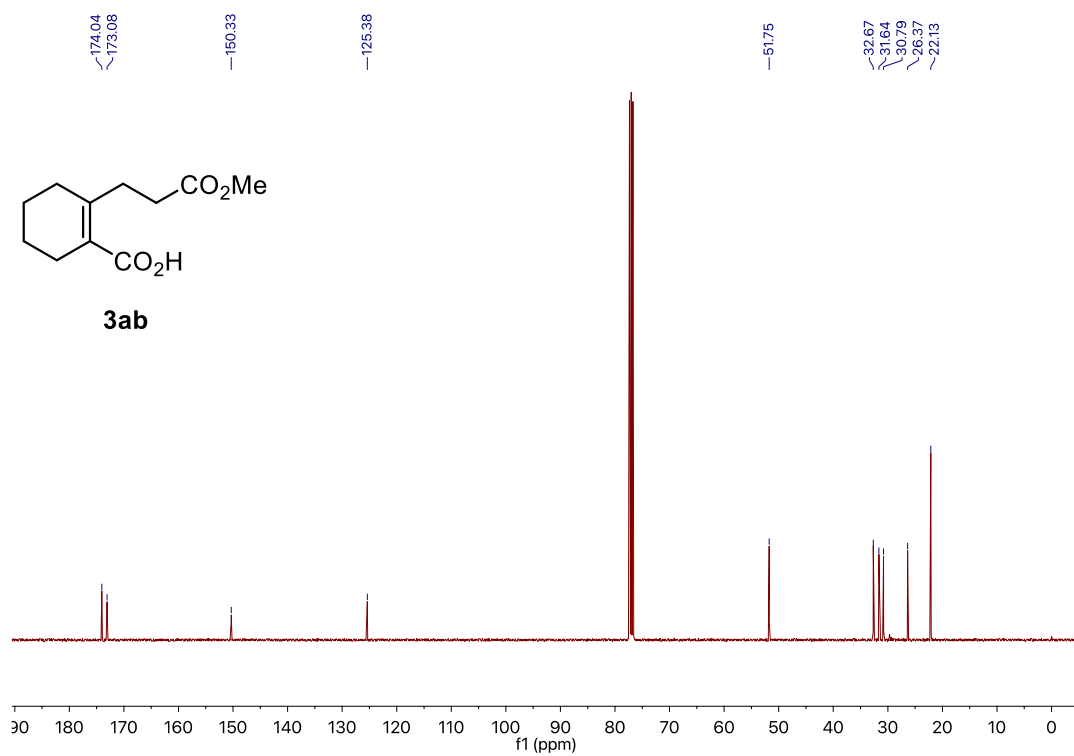

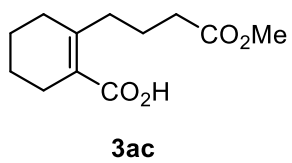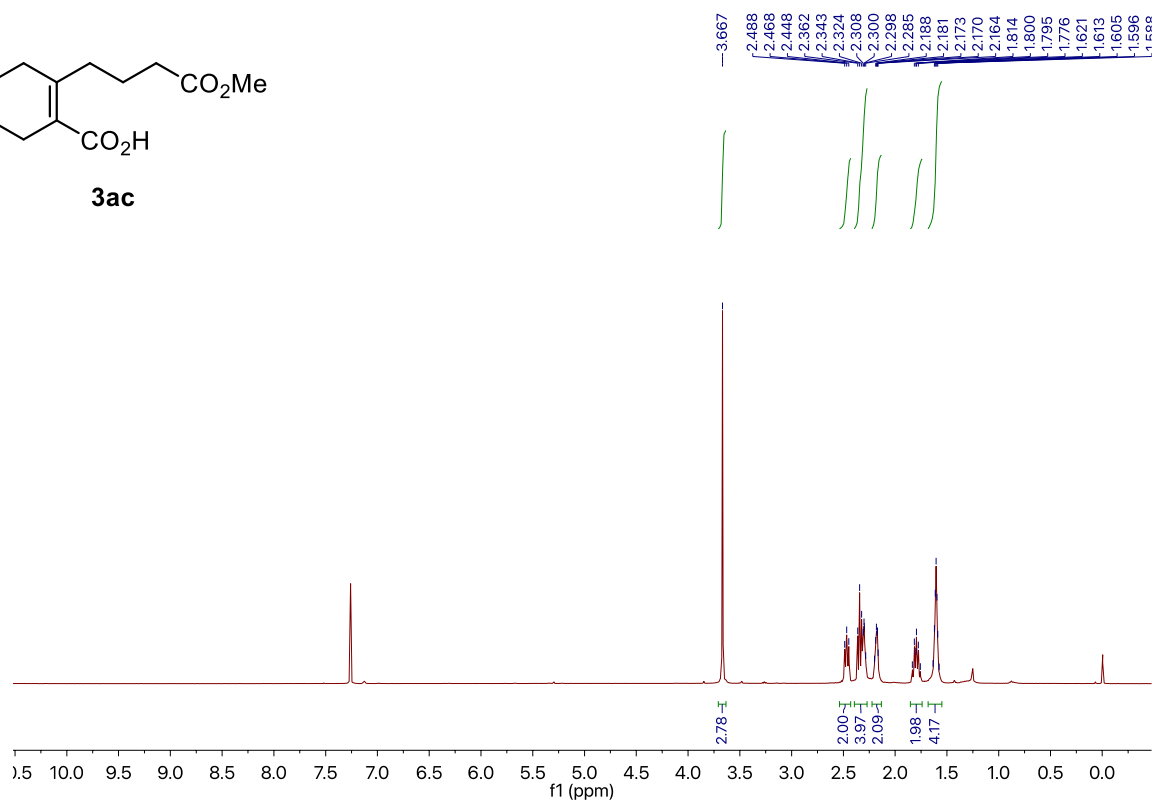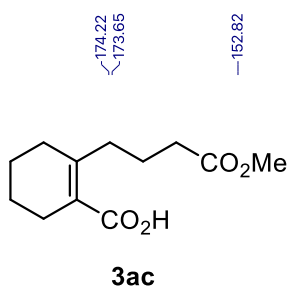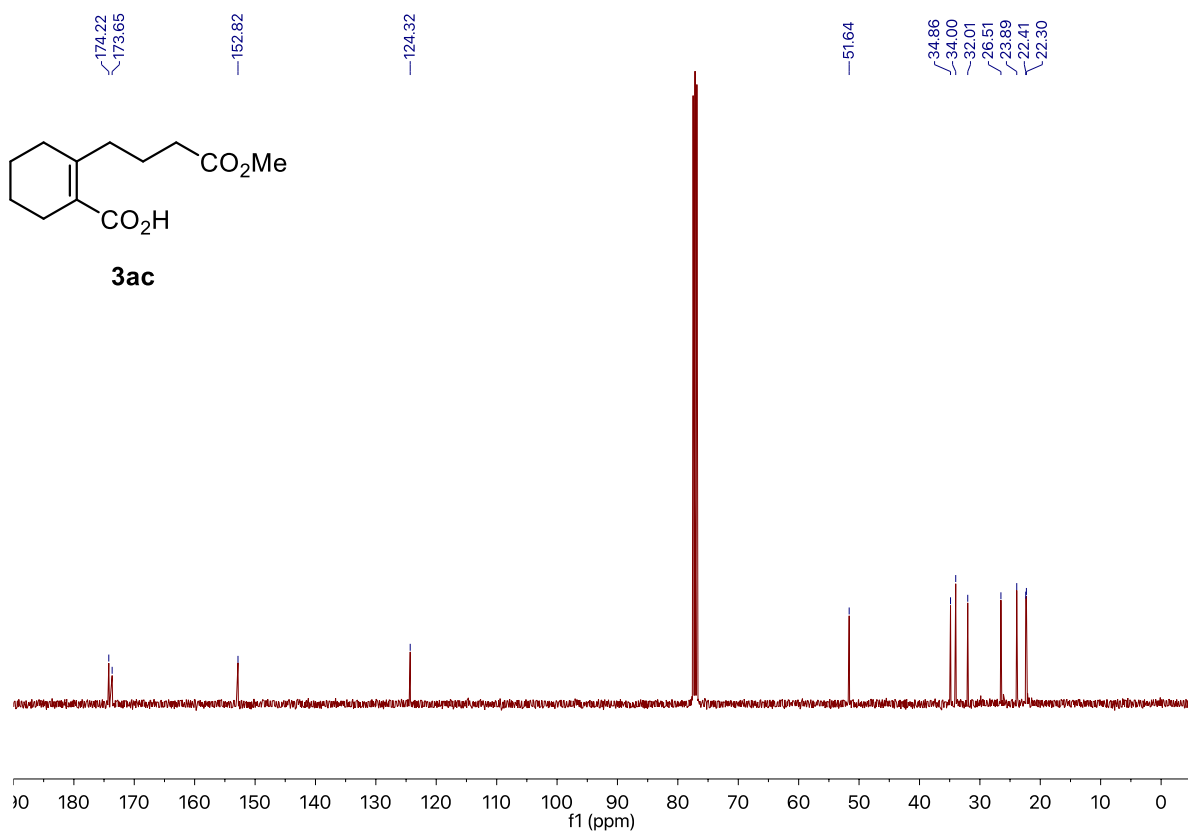

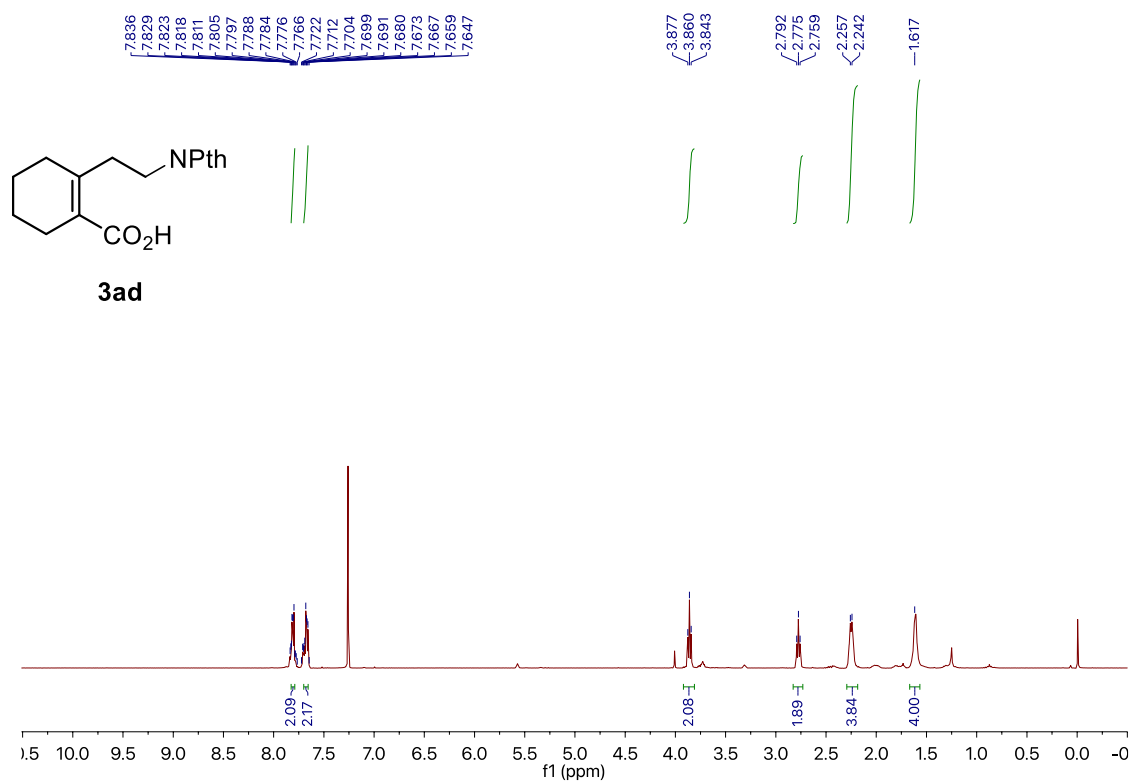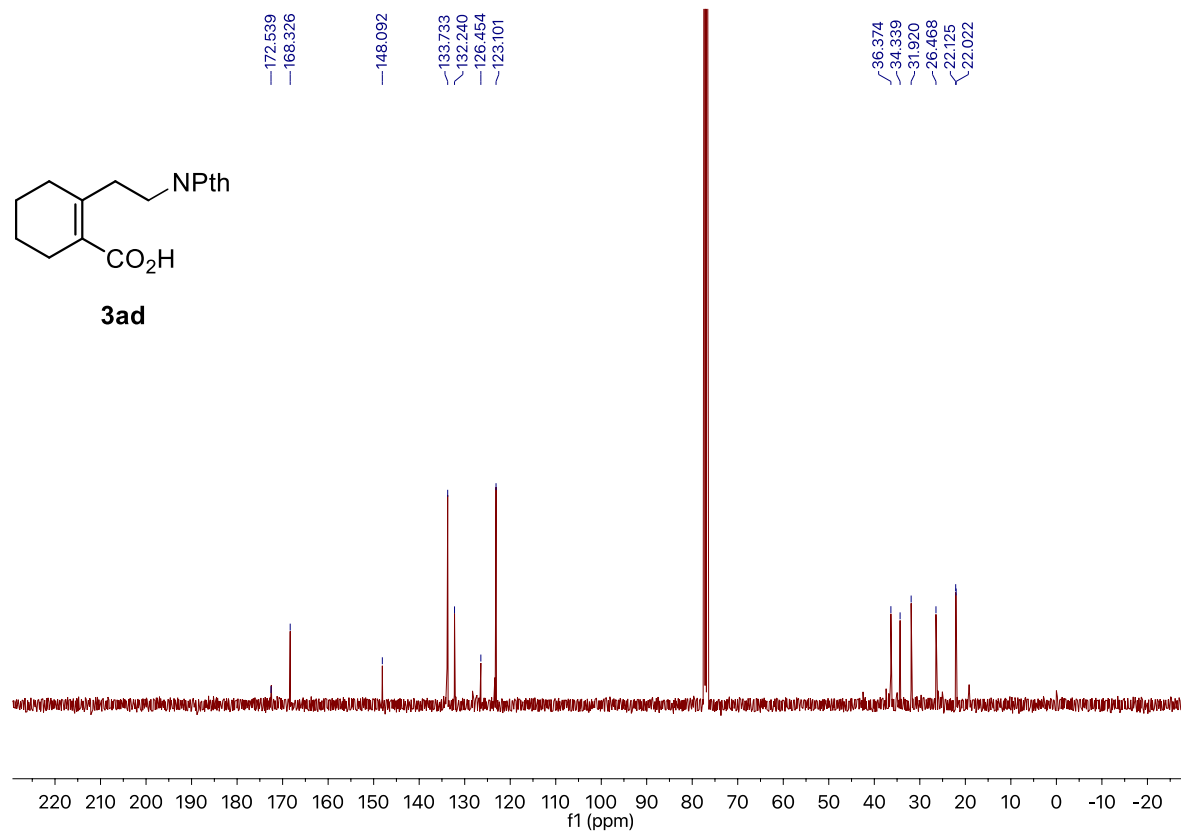

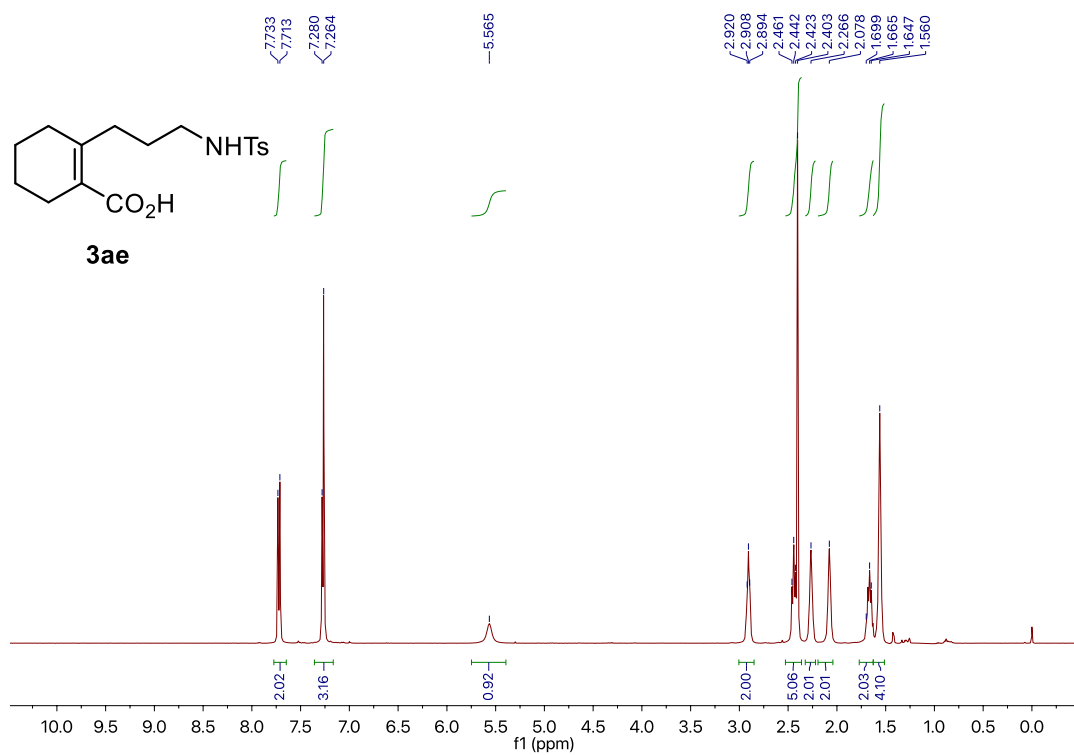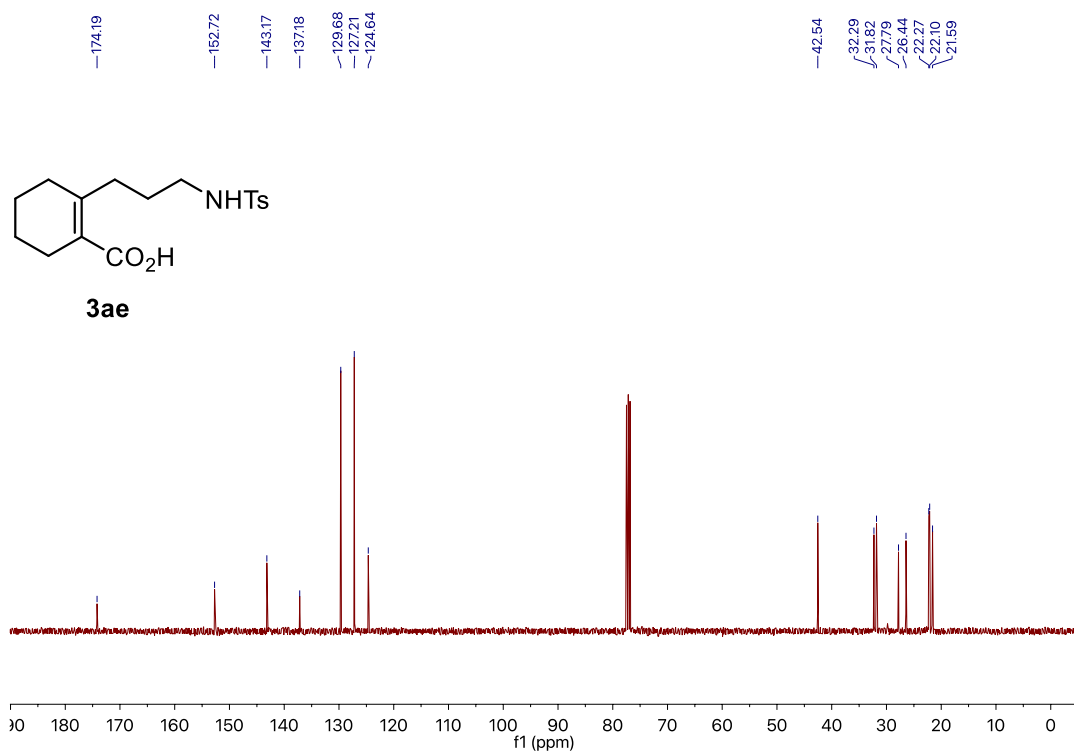

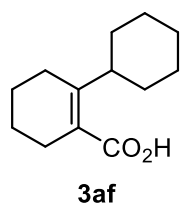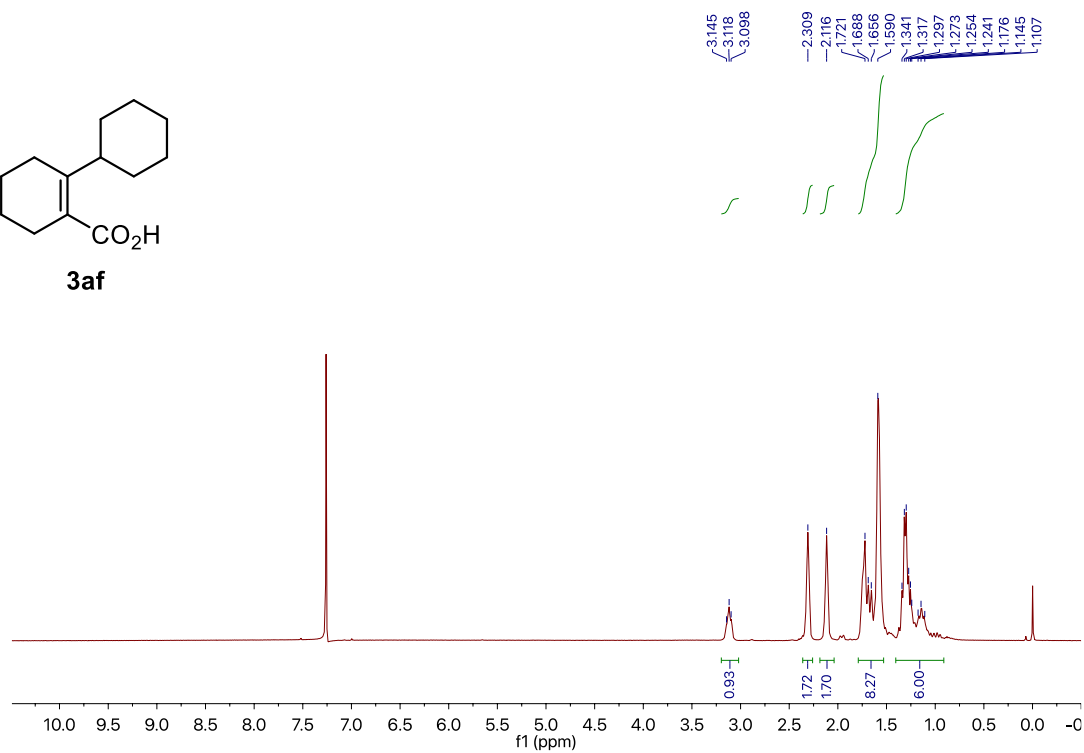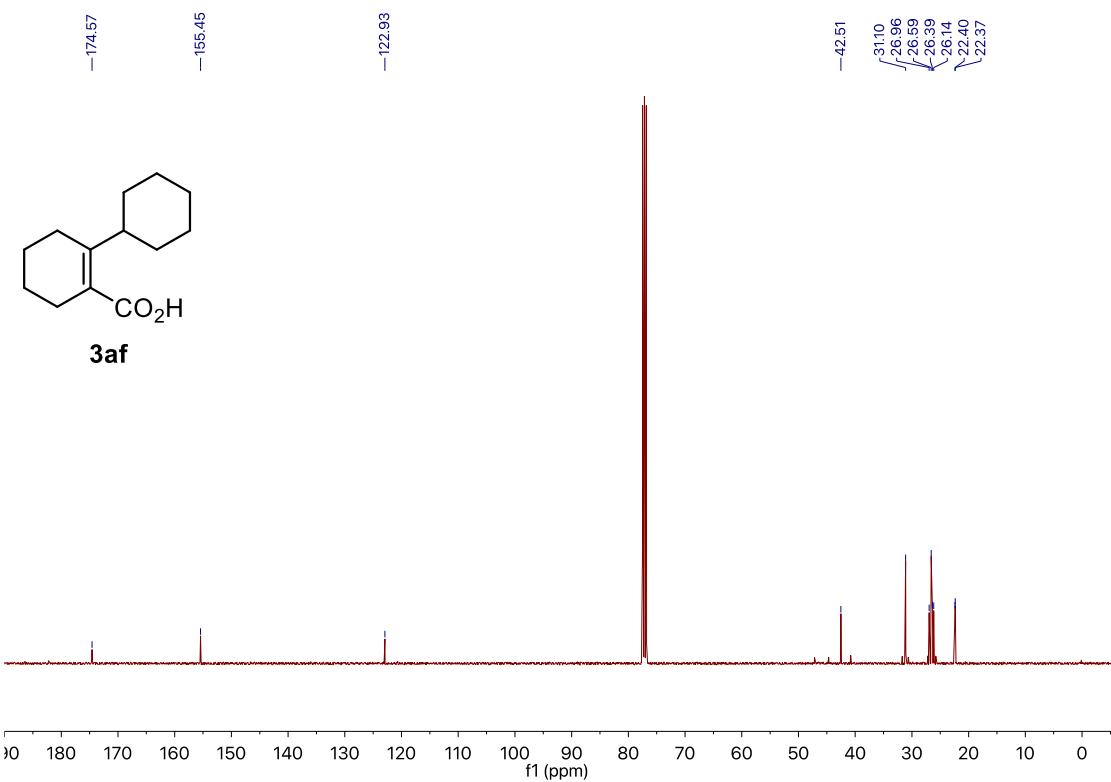

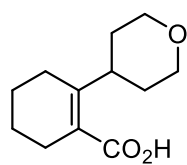

**3ag**

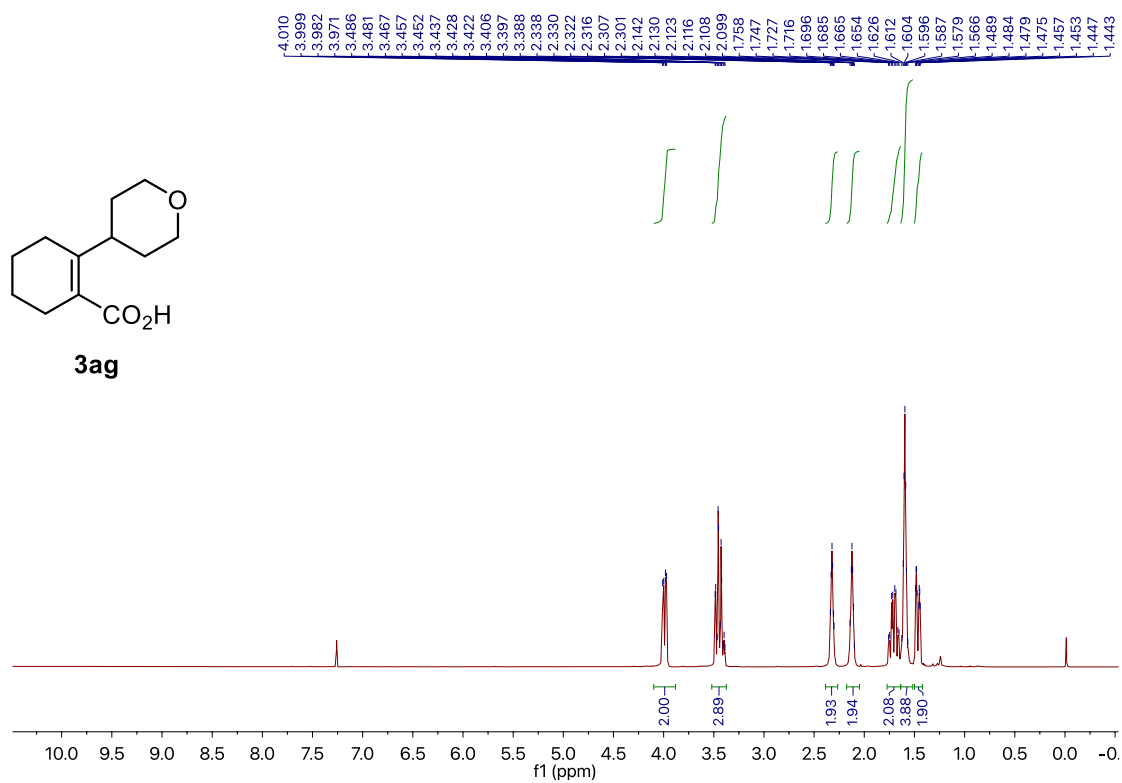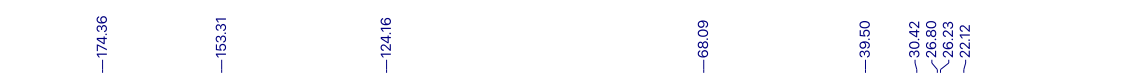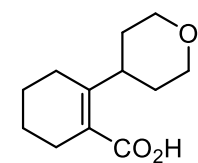

**3ag**

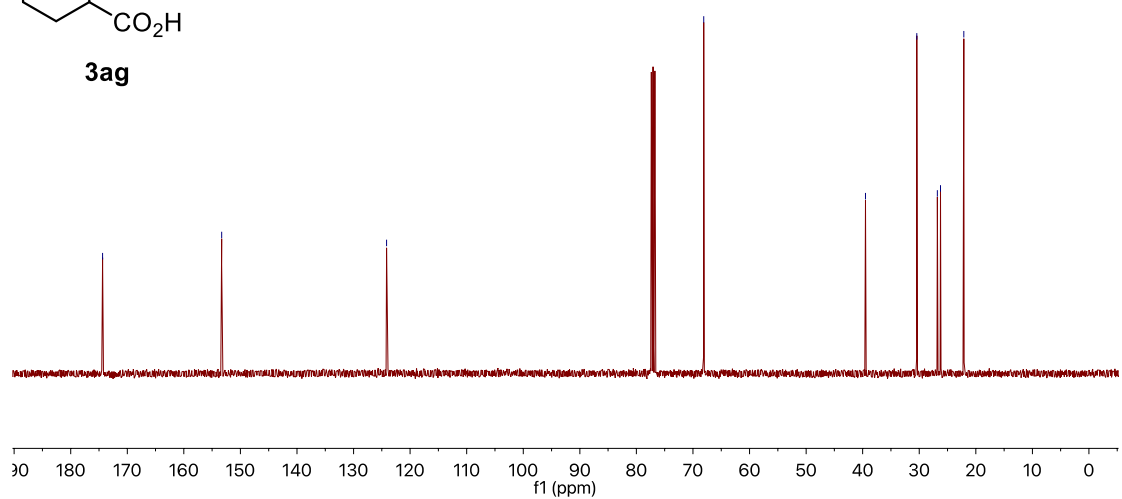

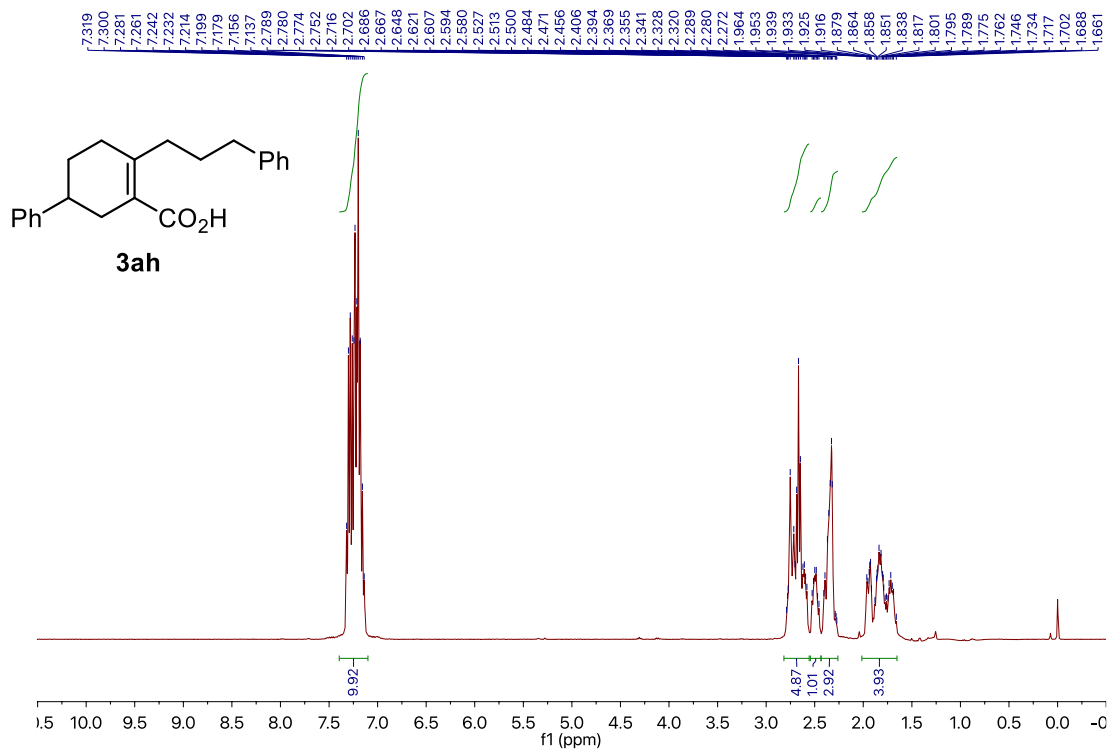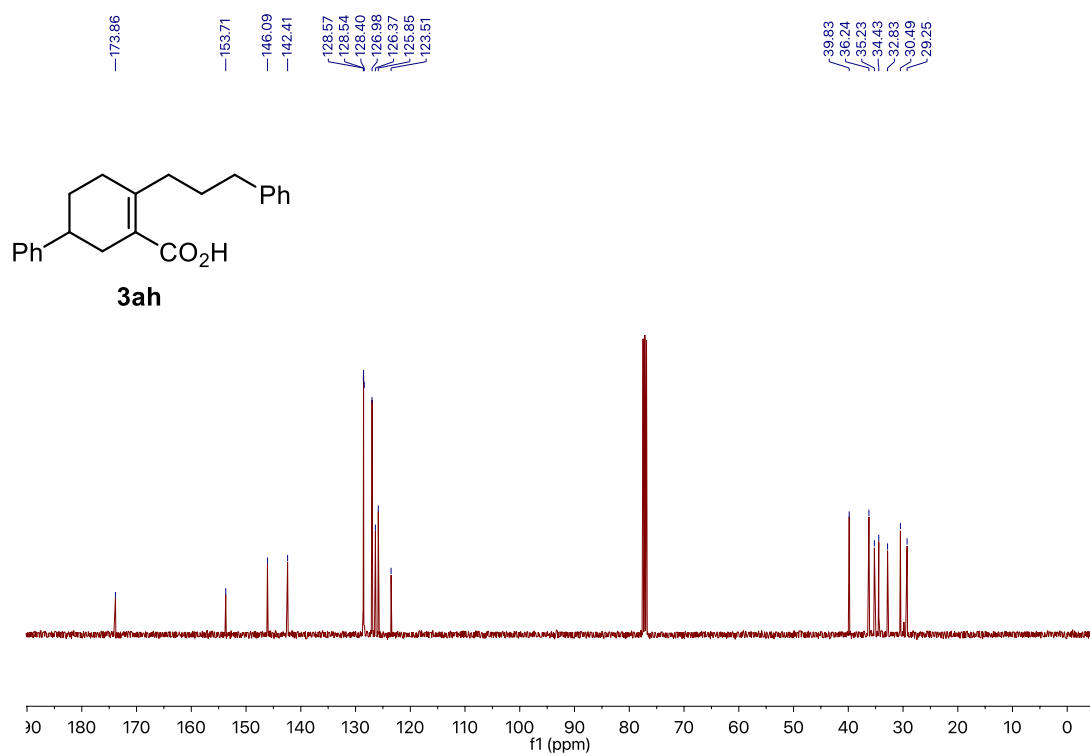

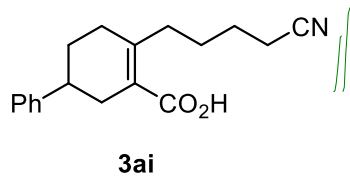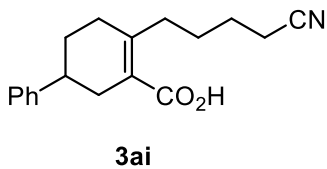

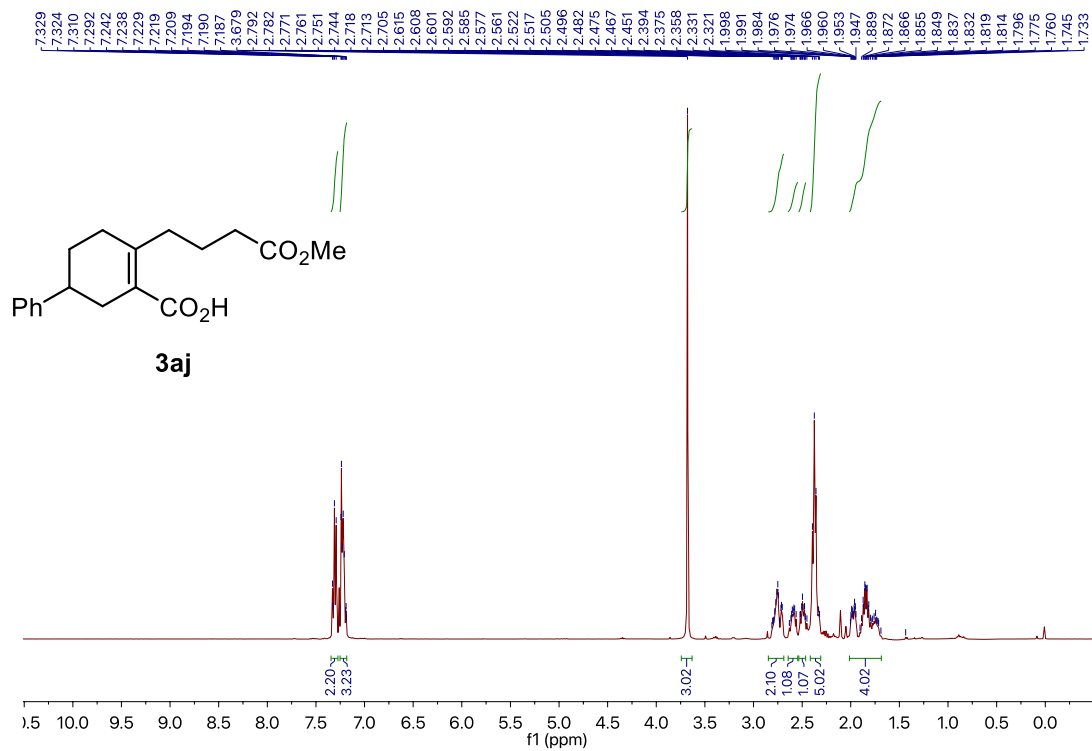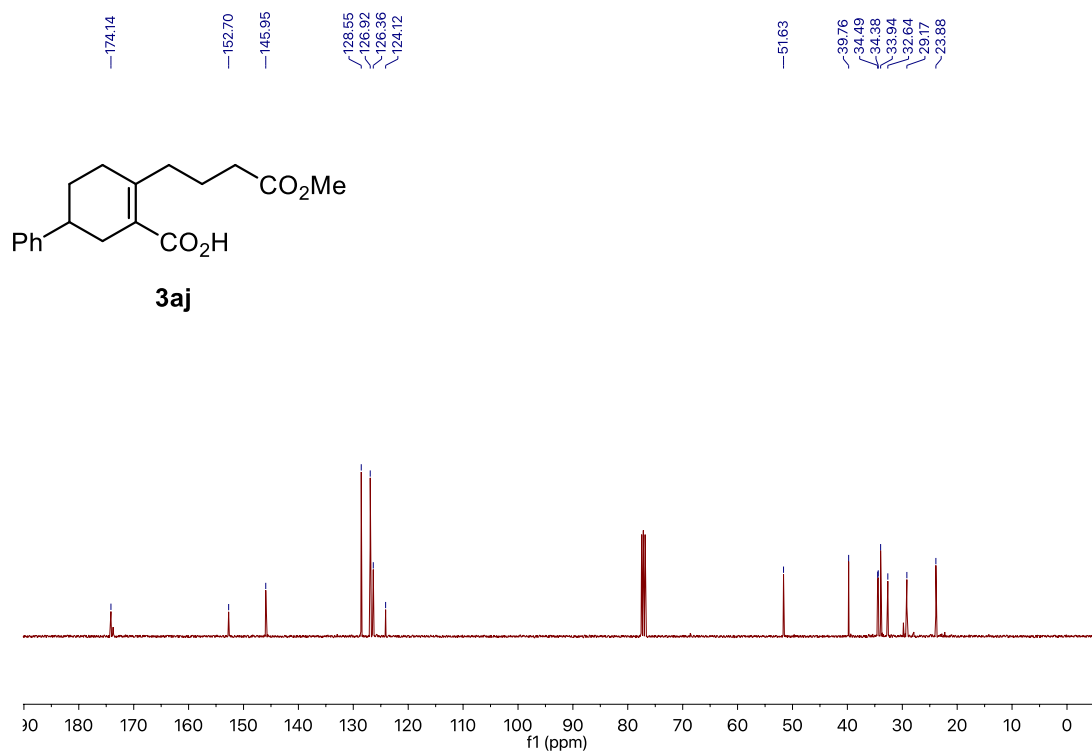

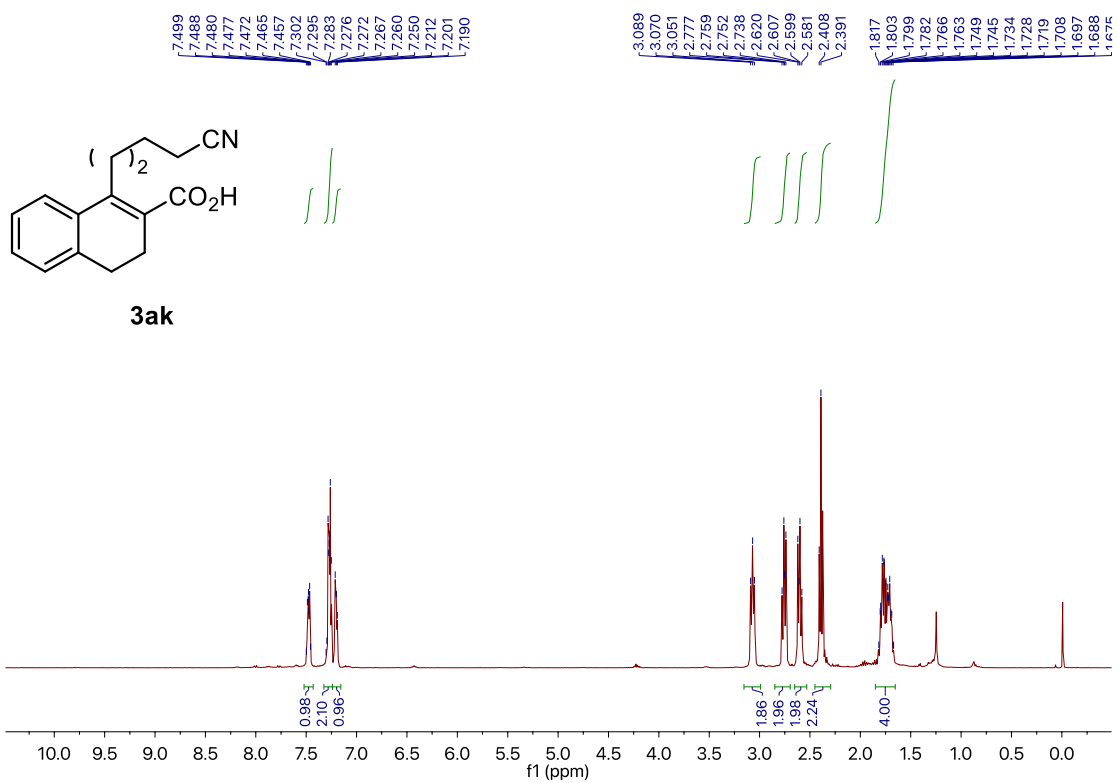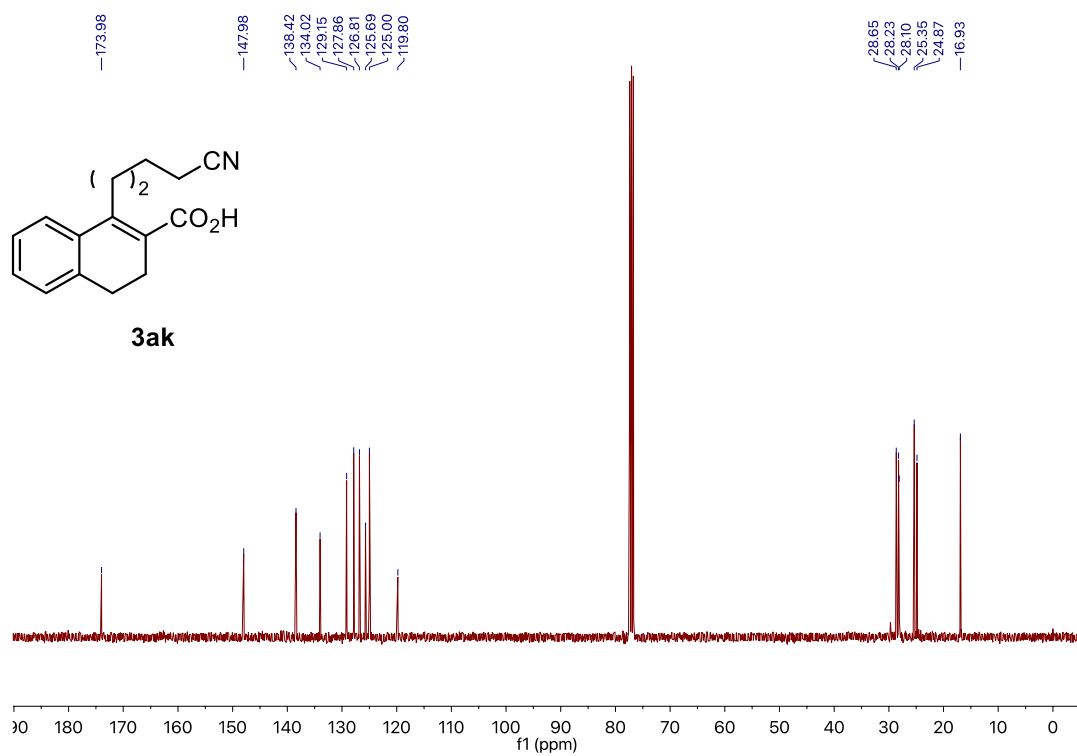

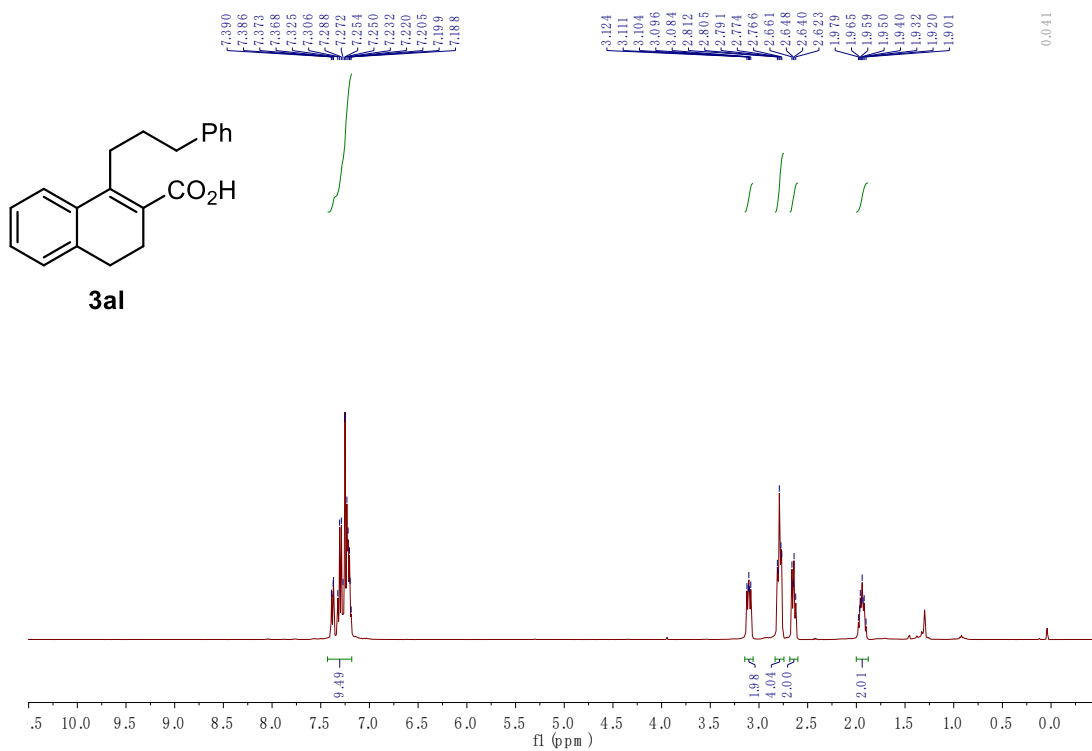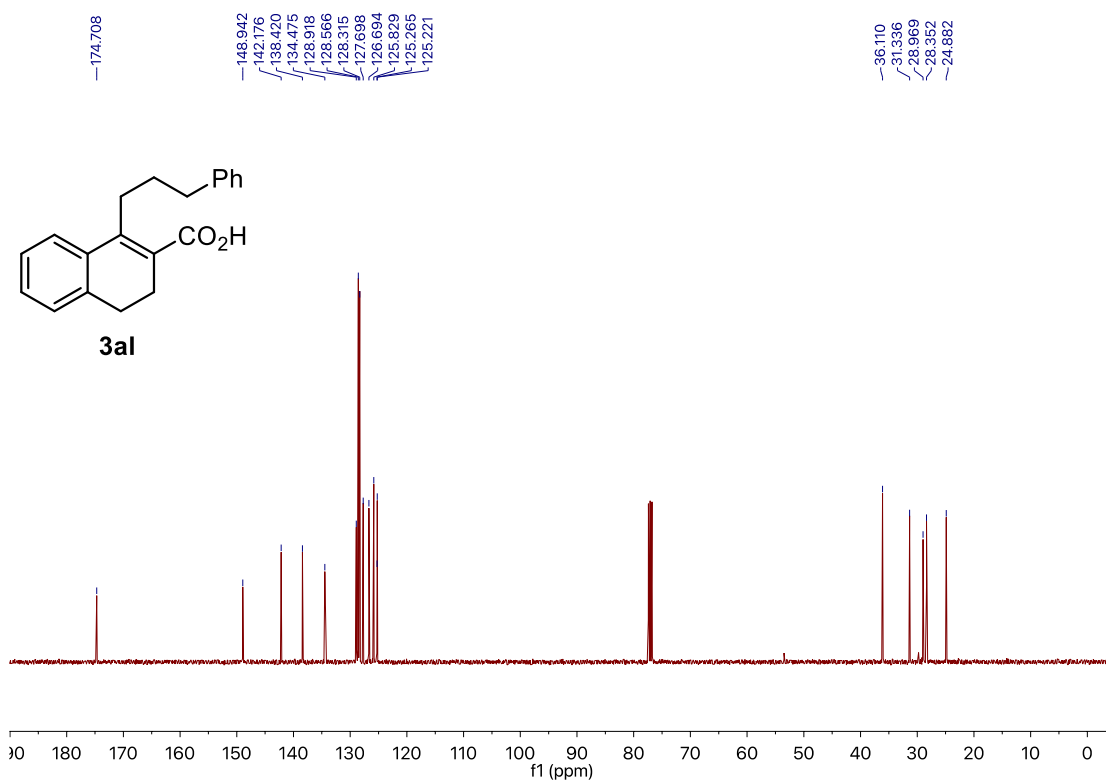

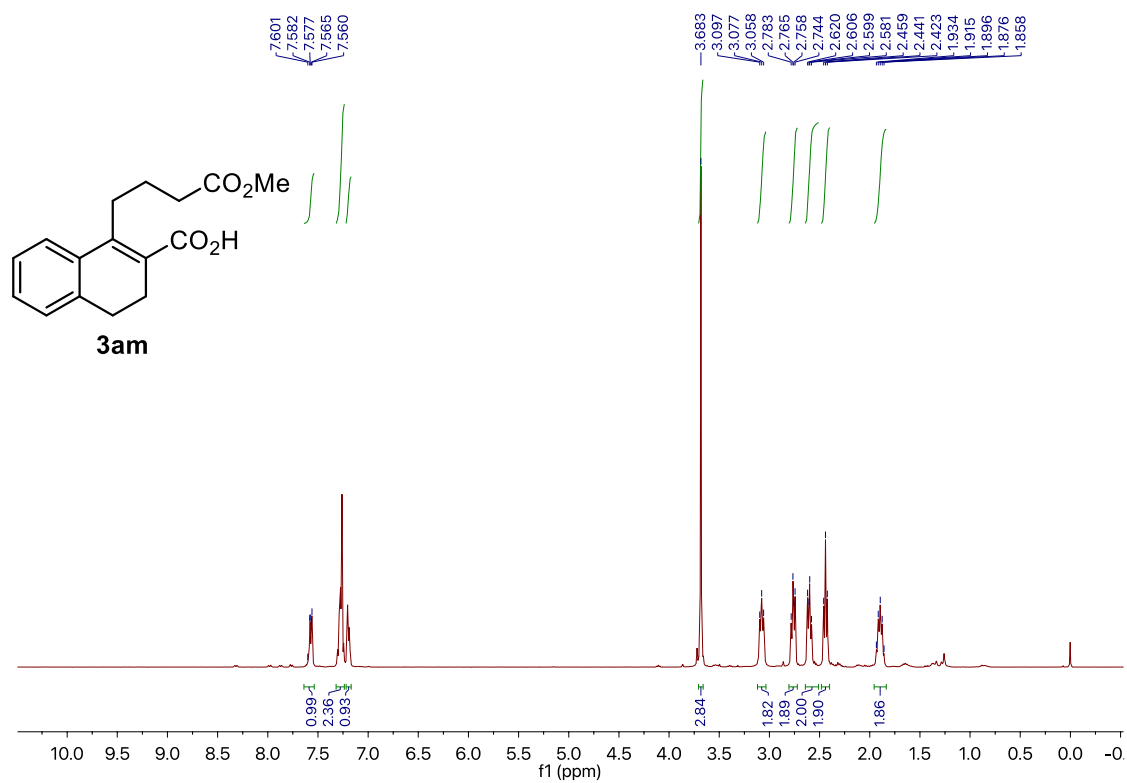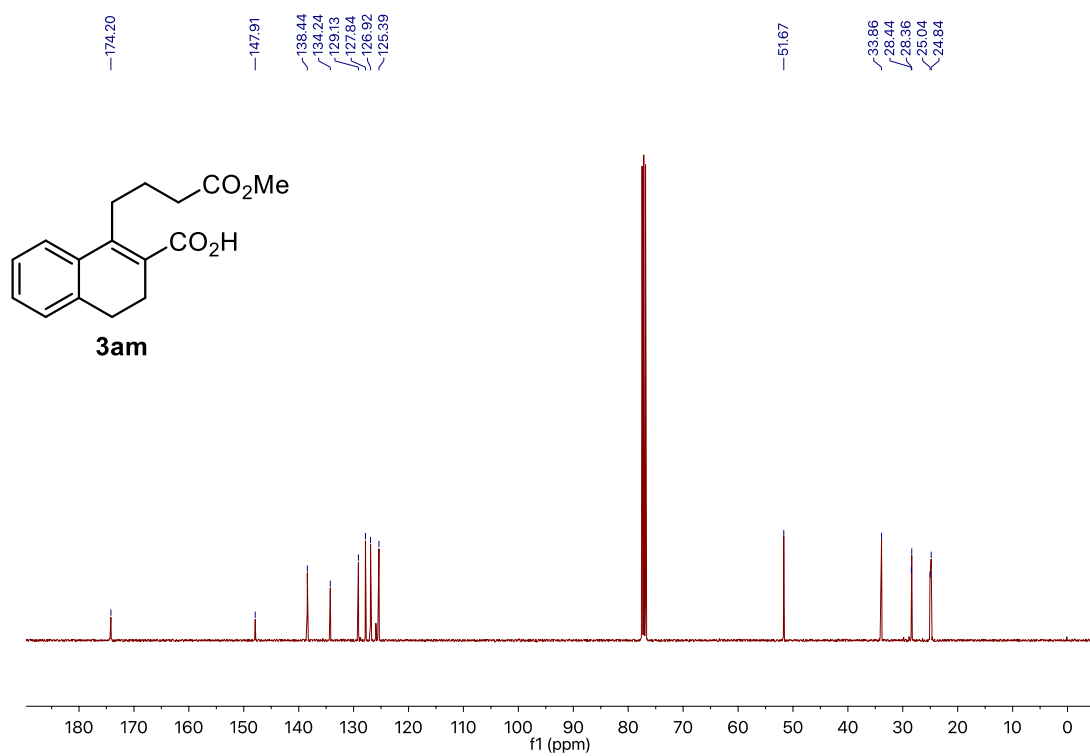

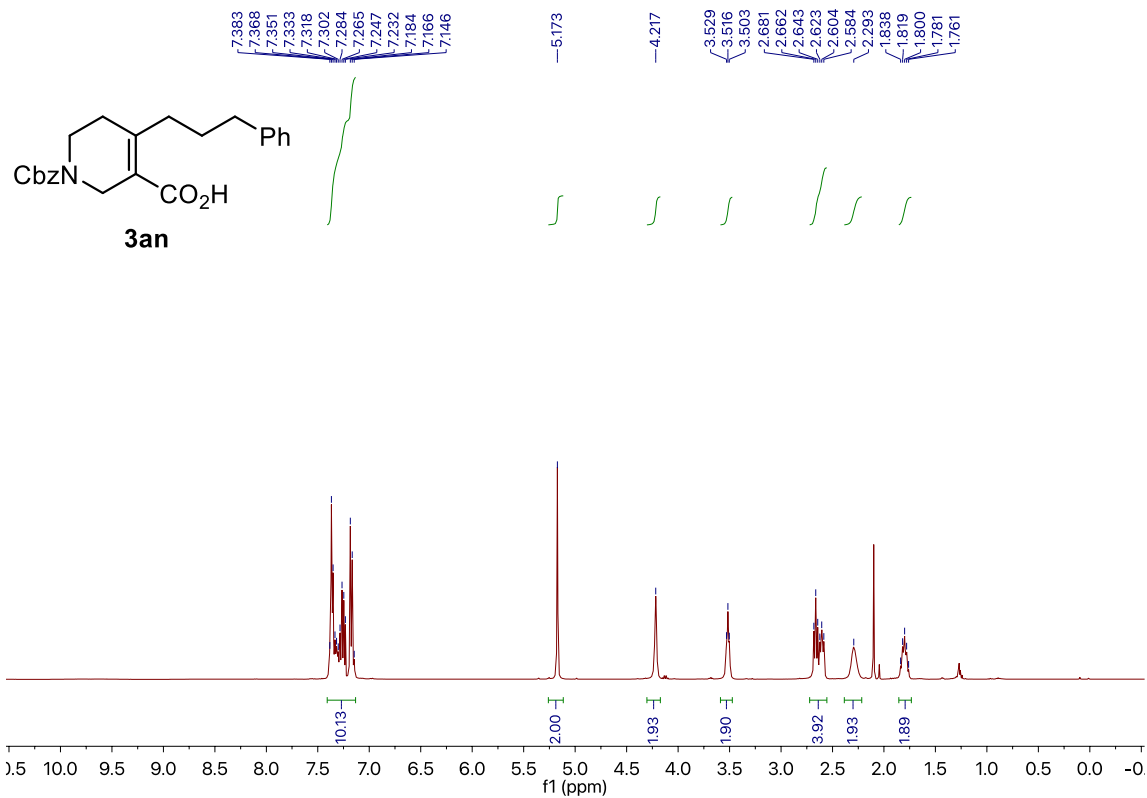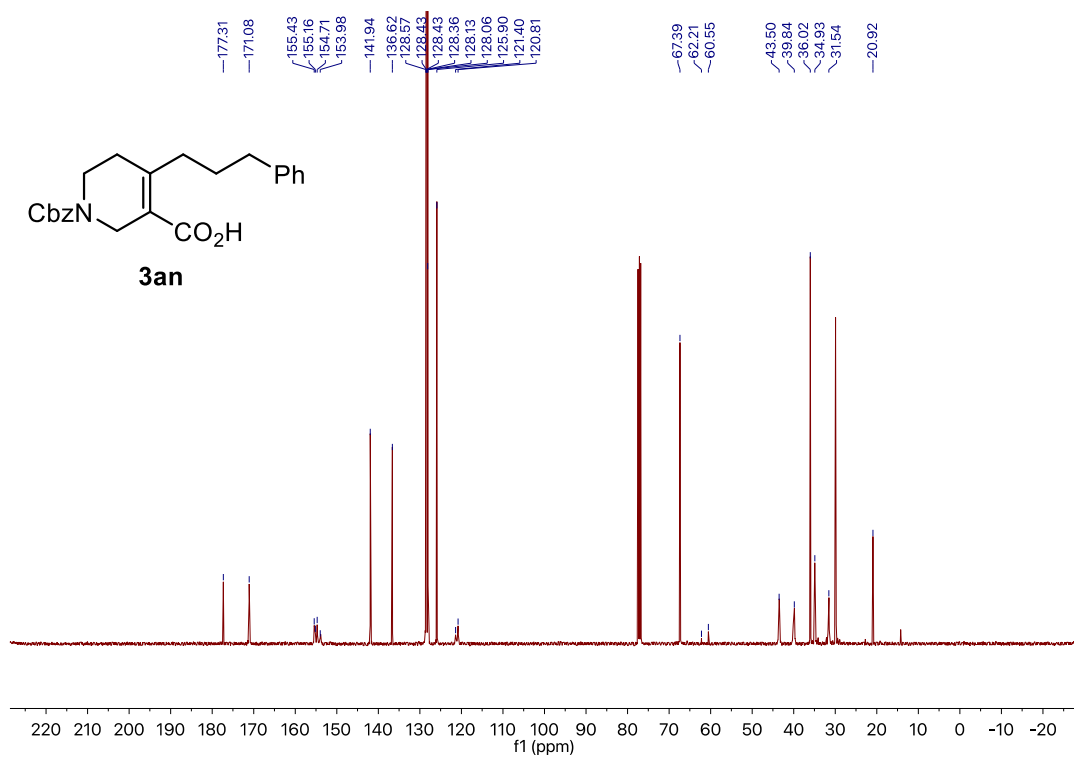

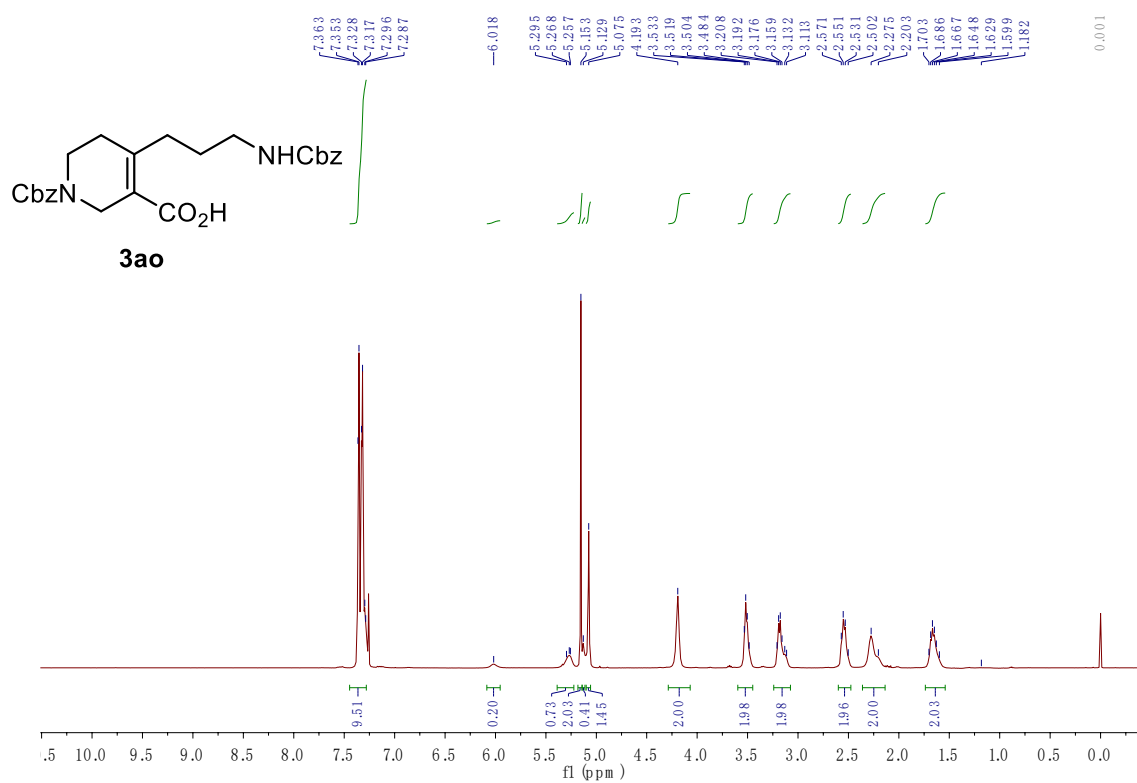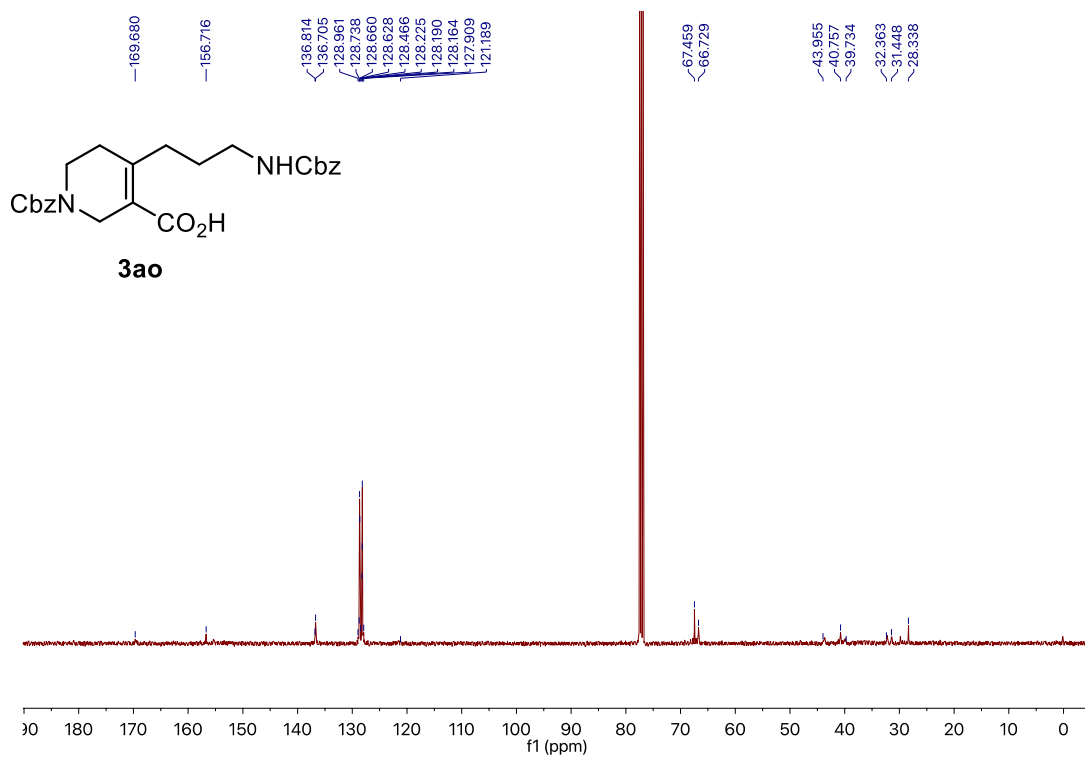

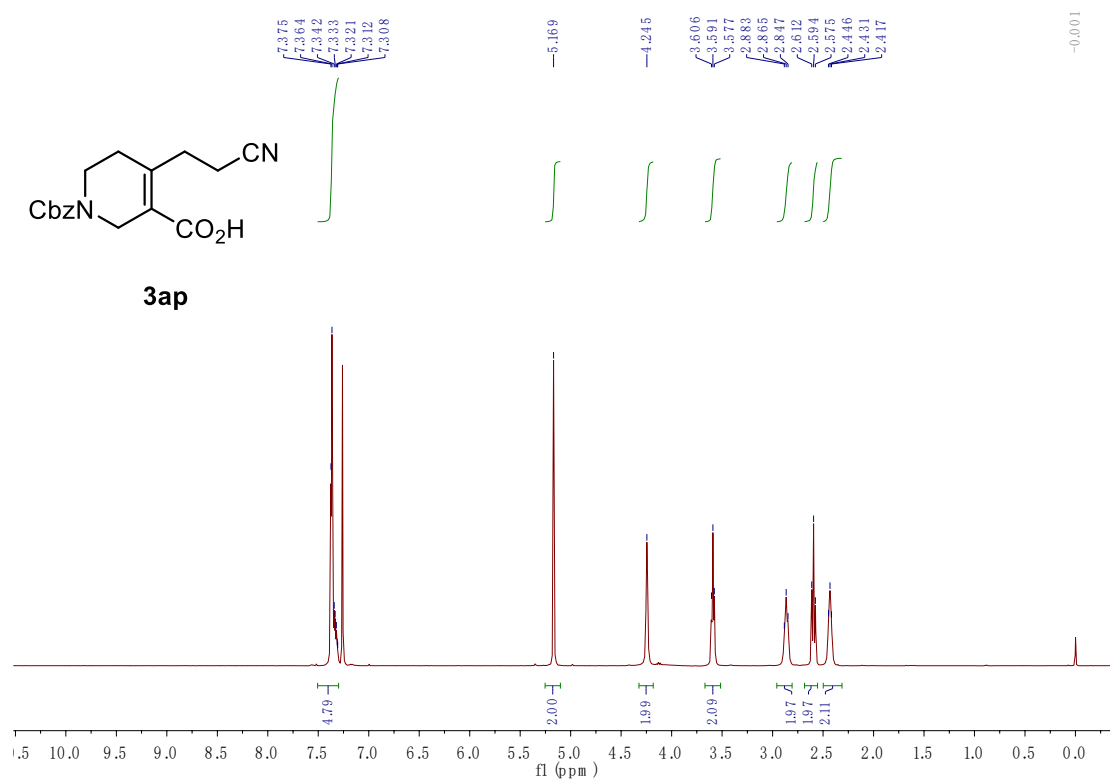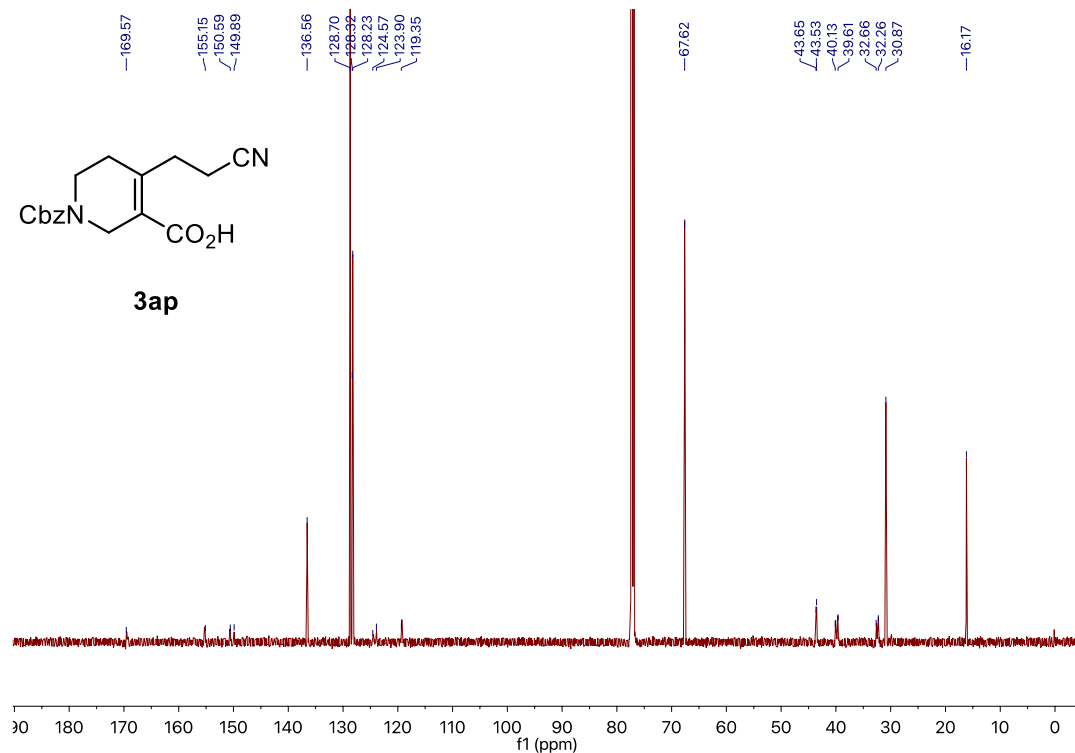

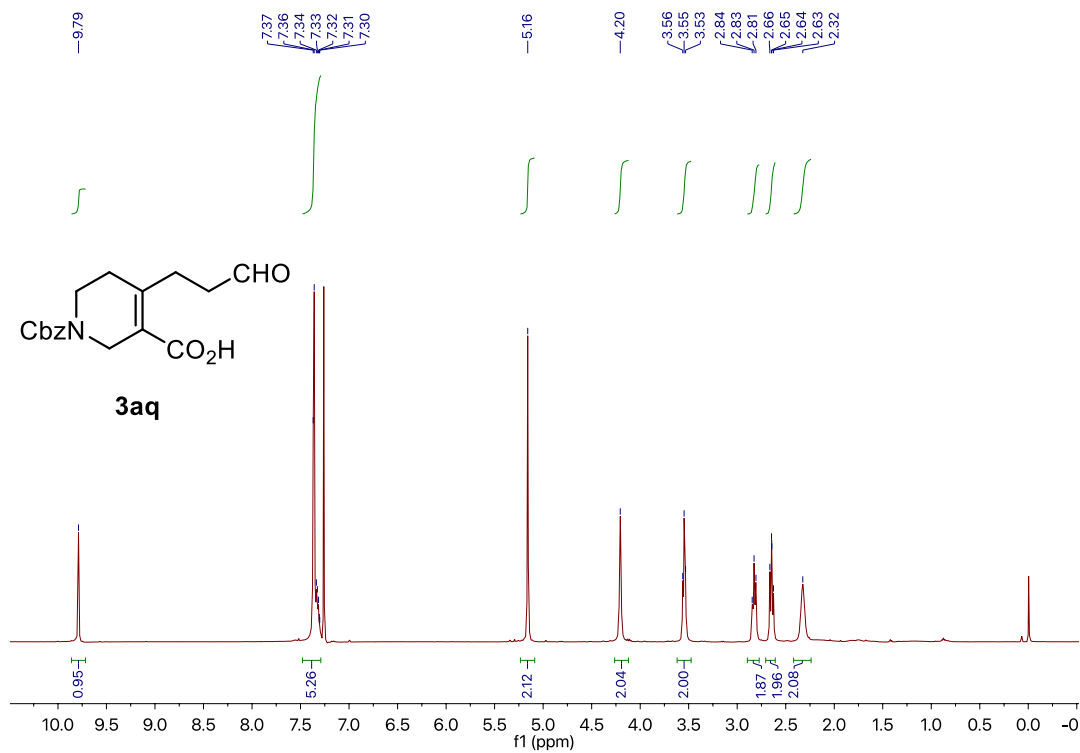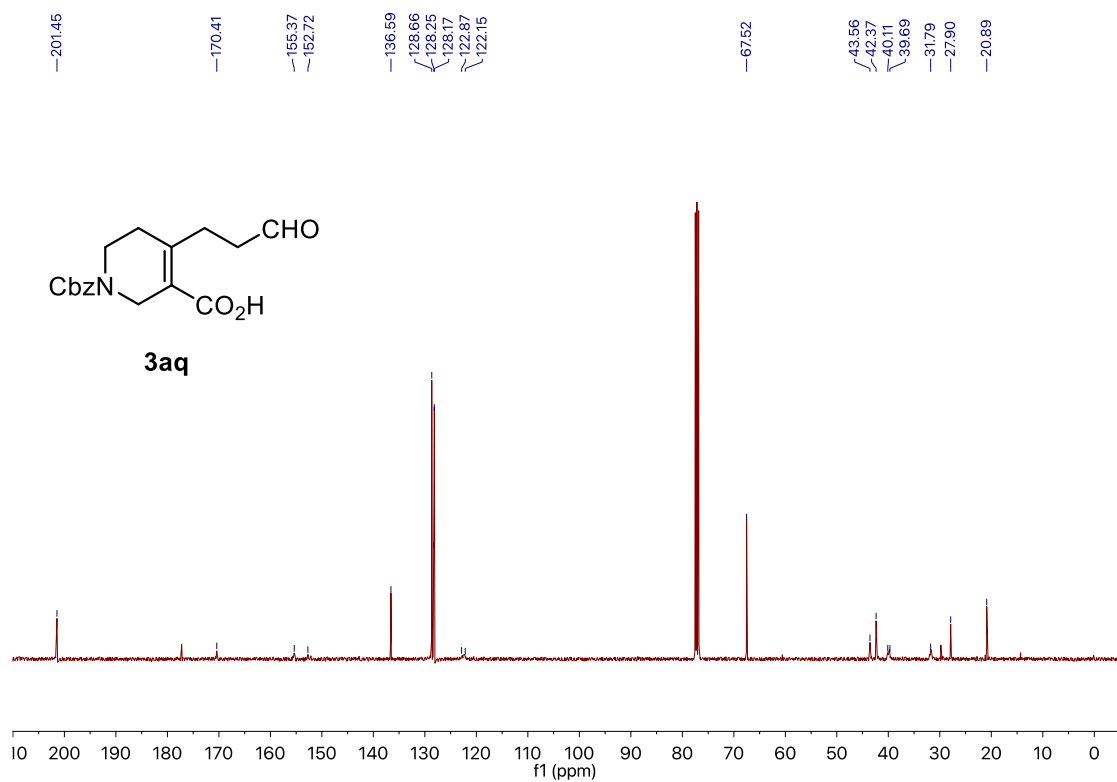

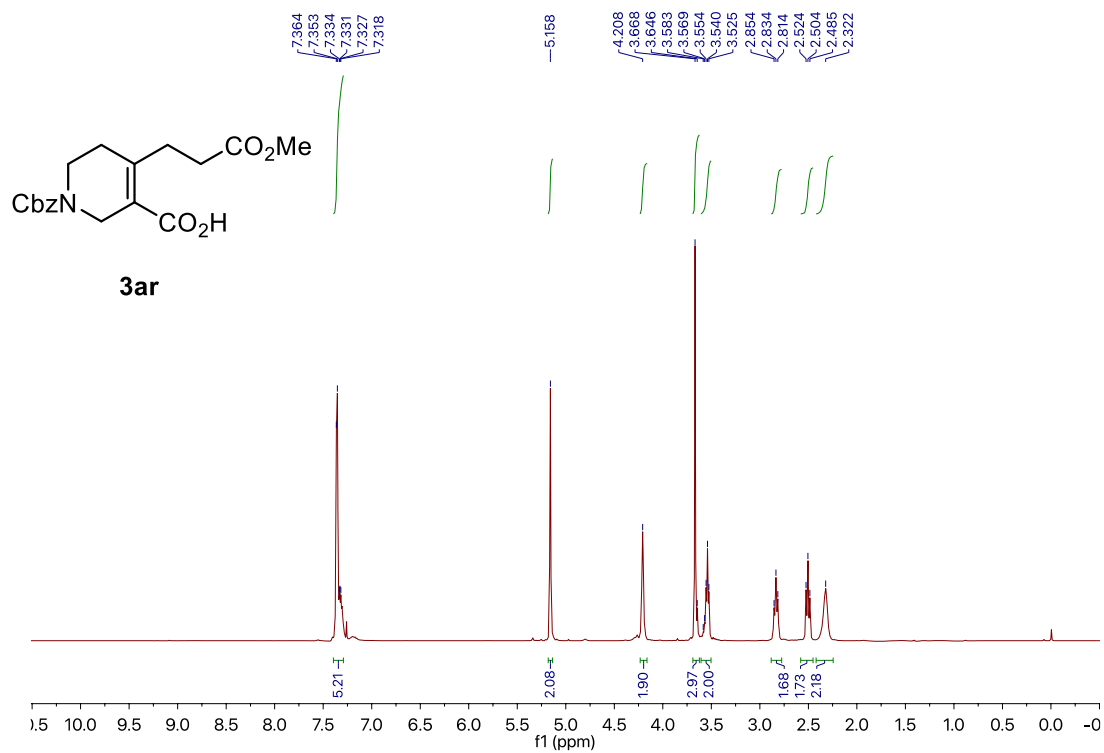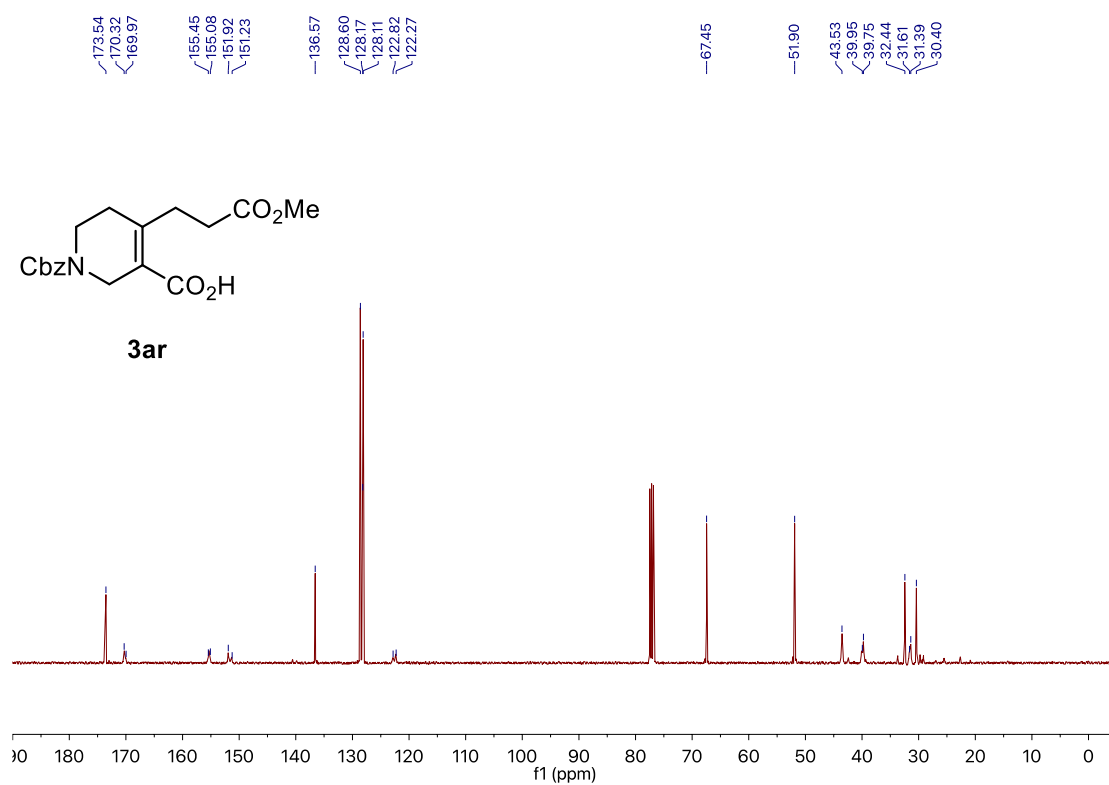

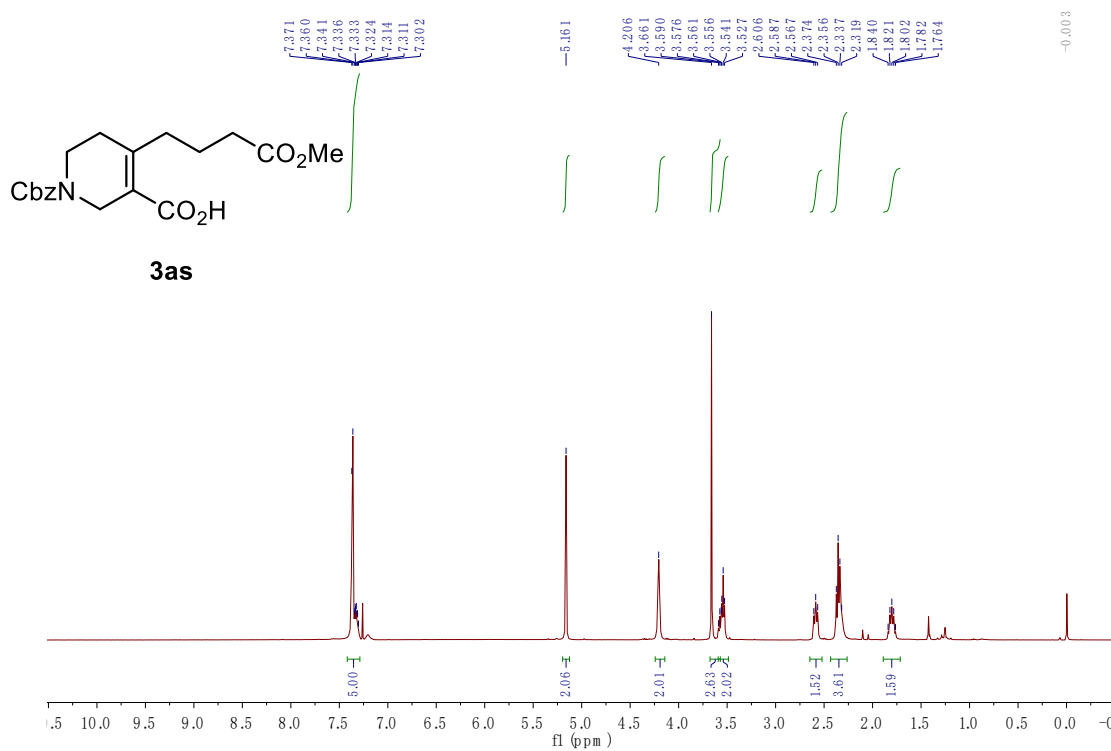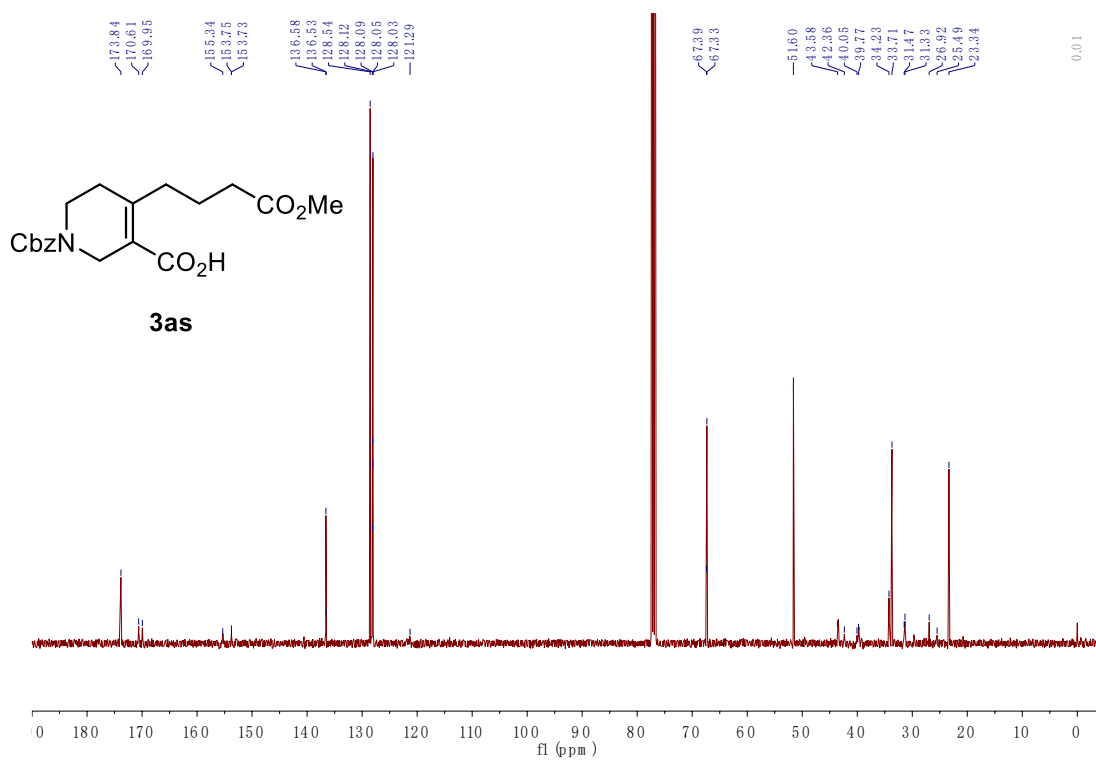

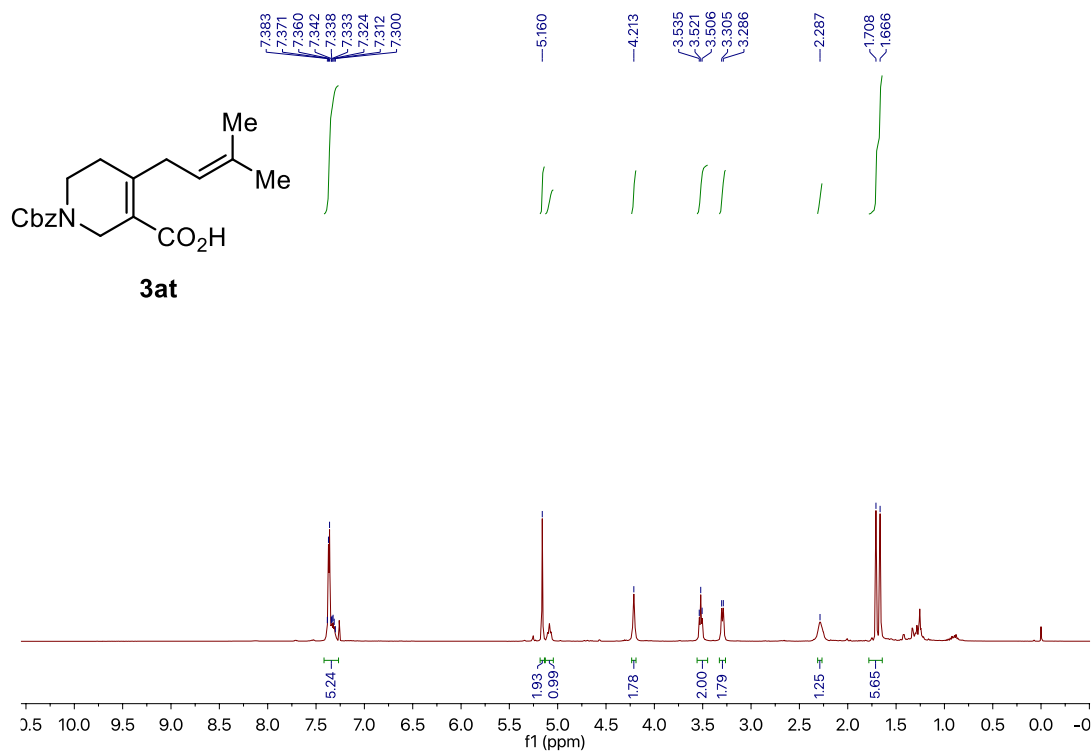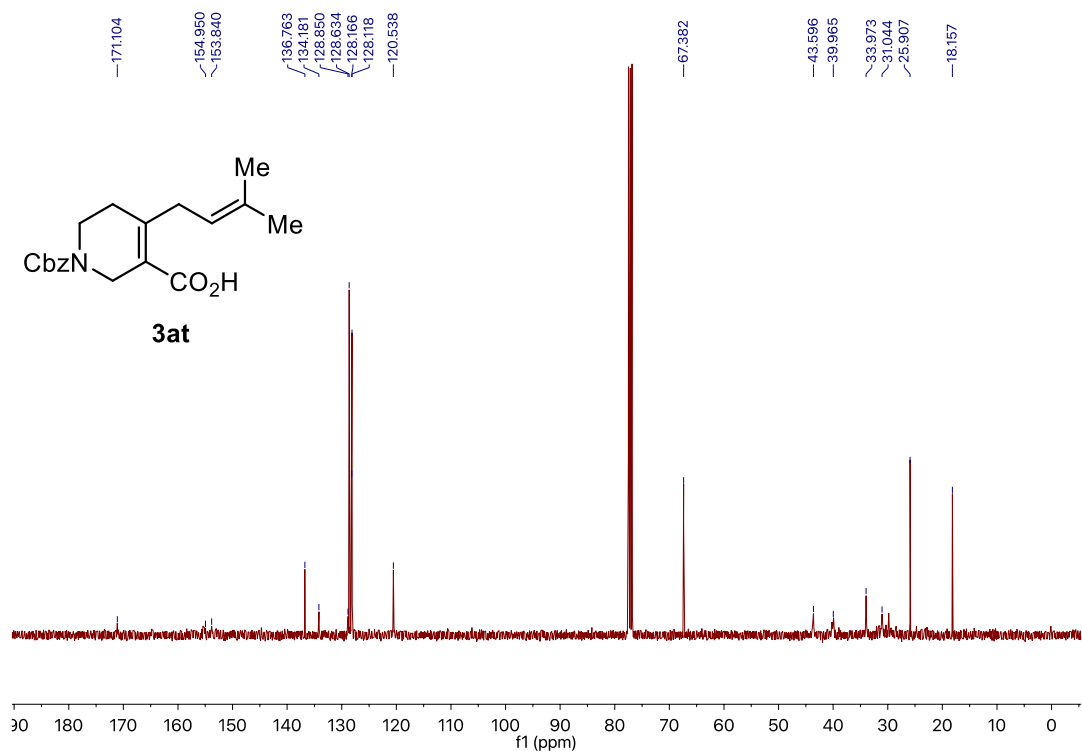

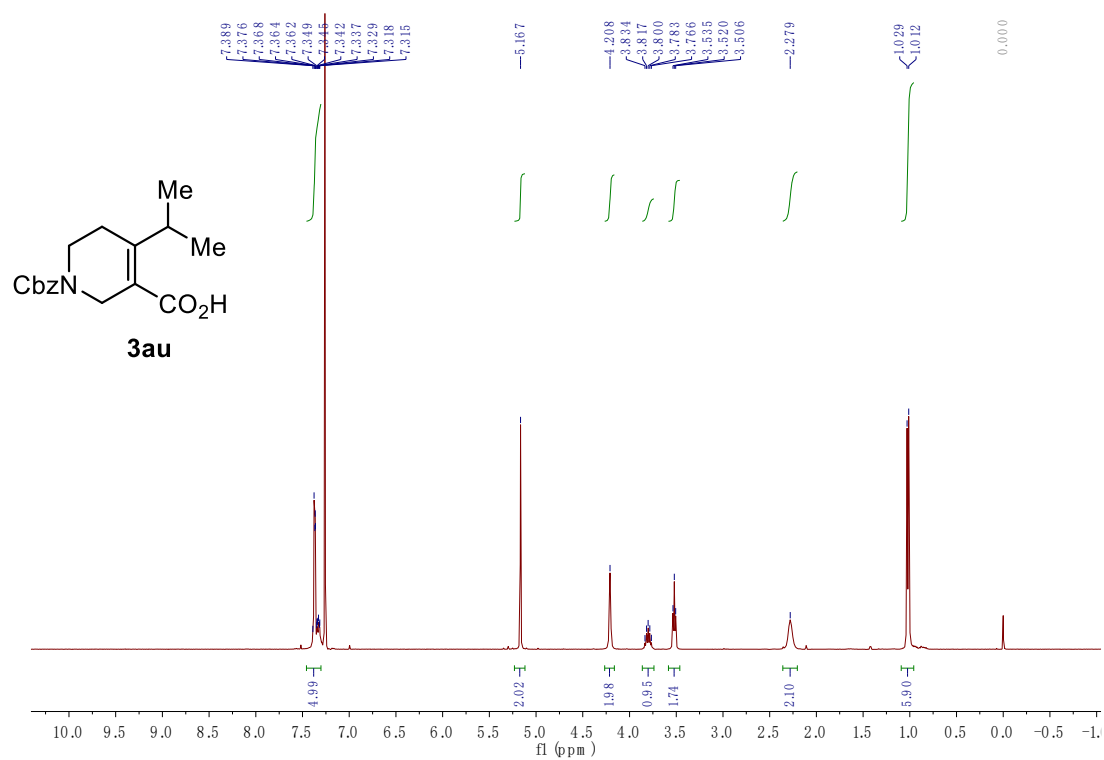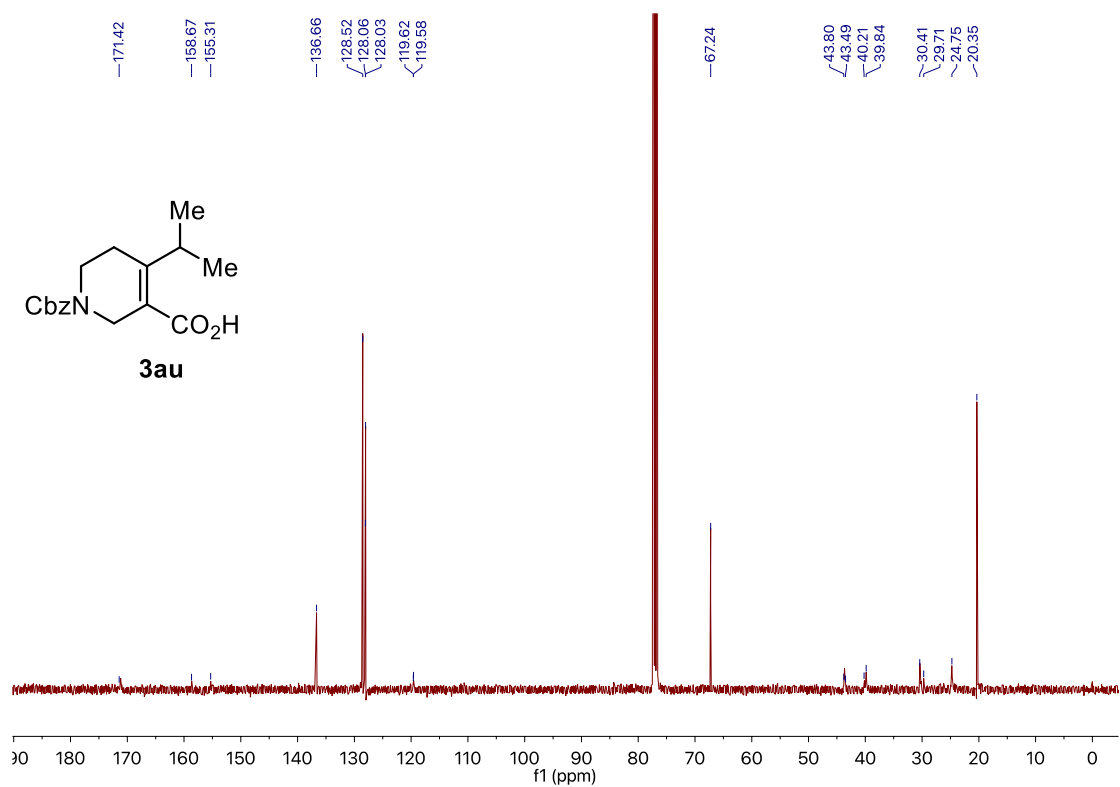

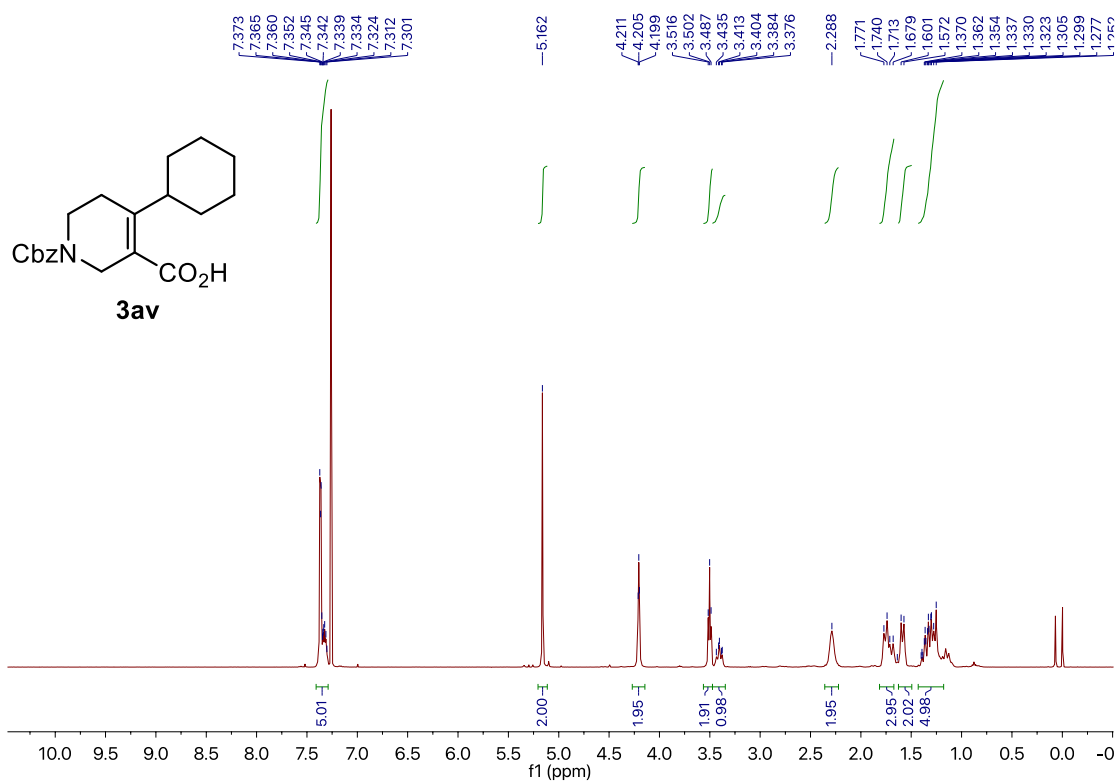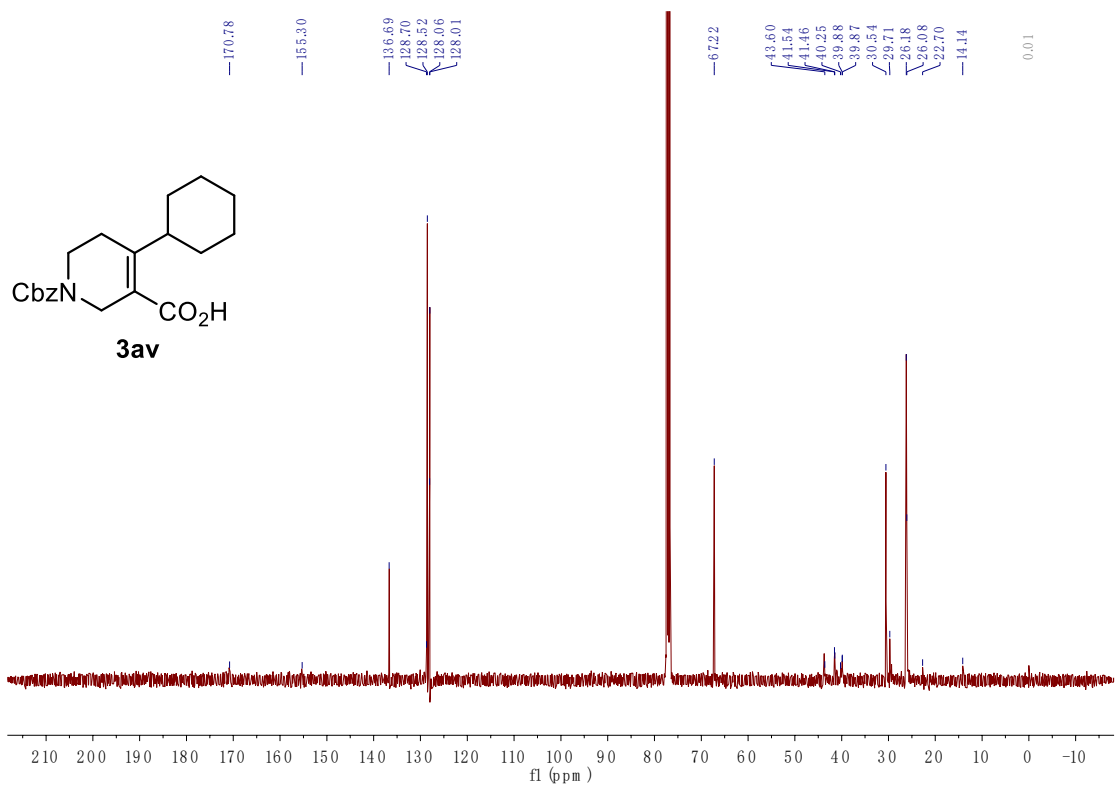

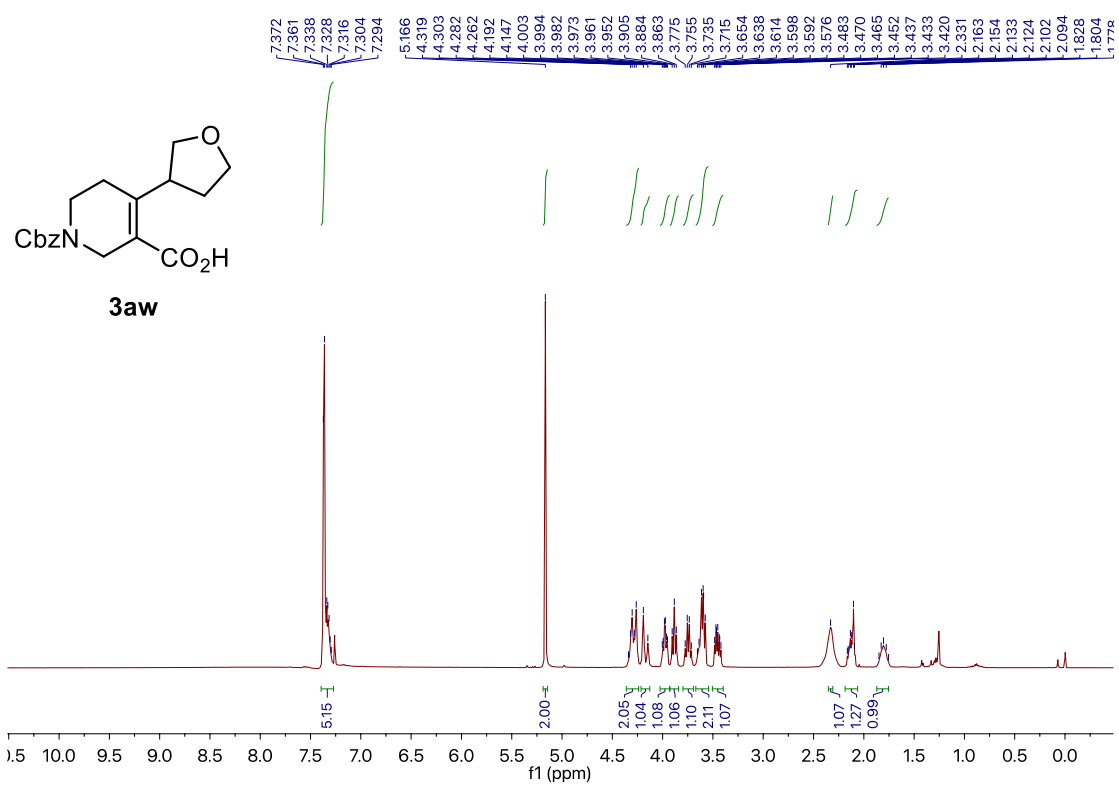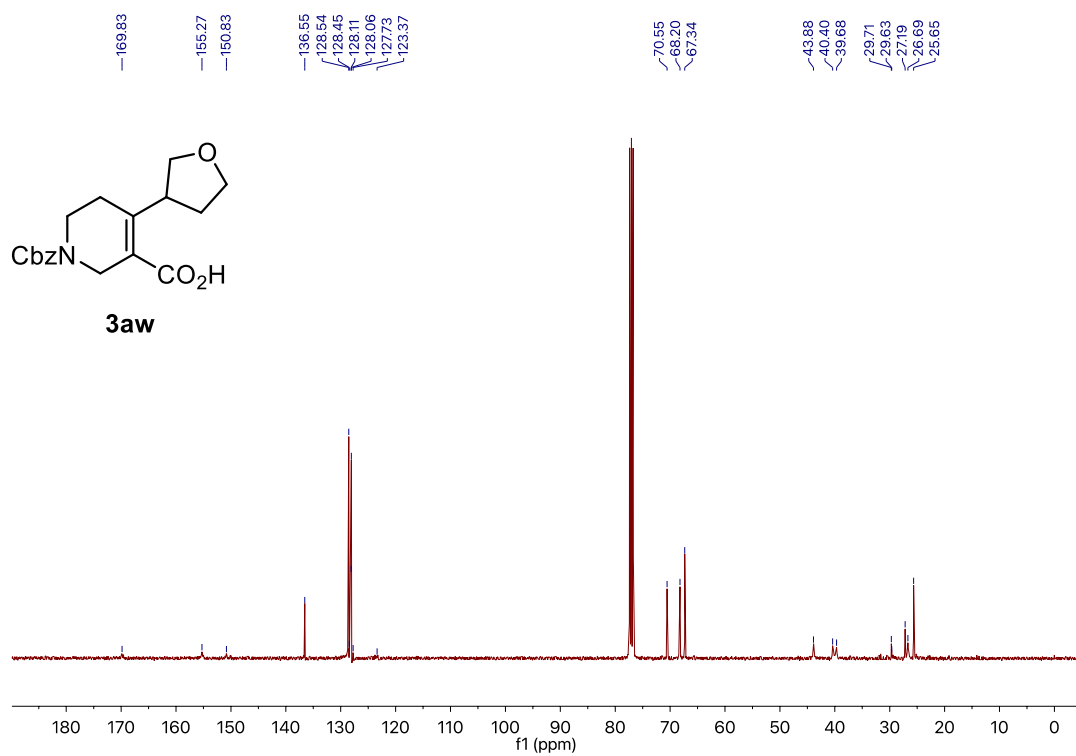

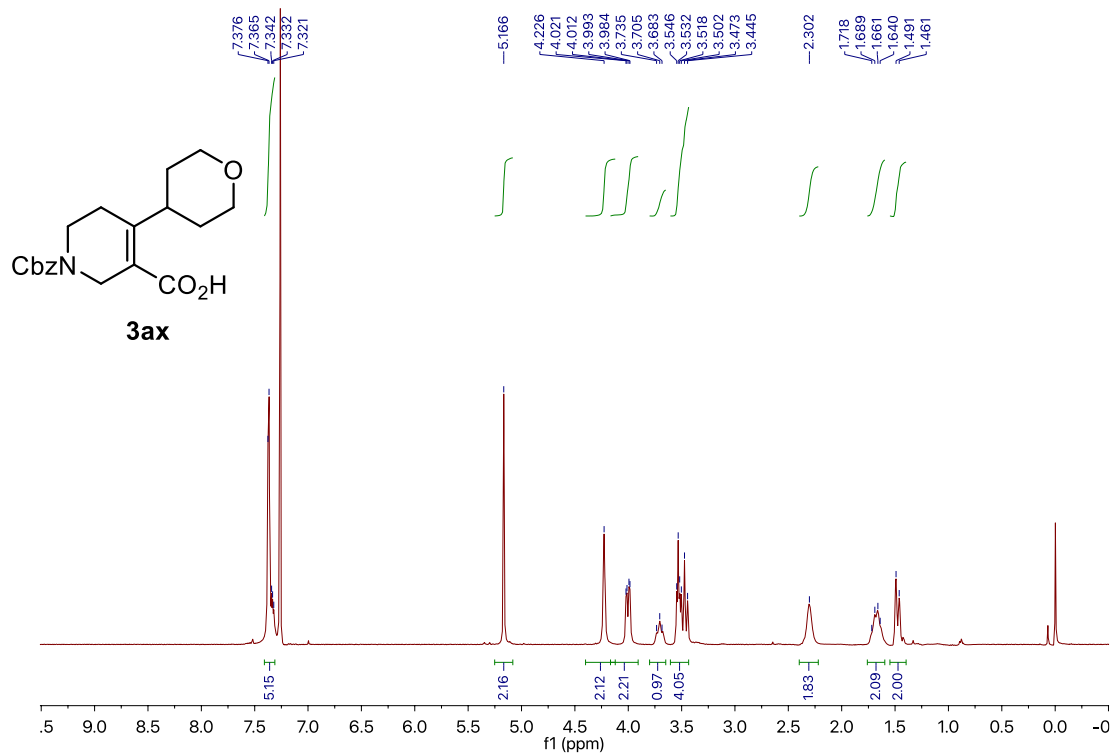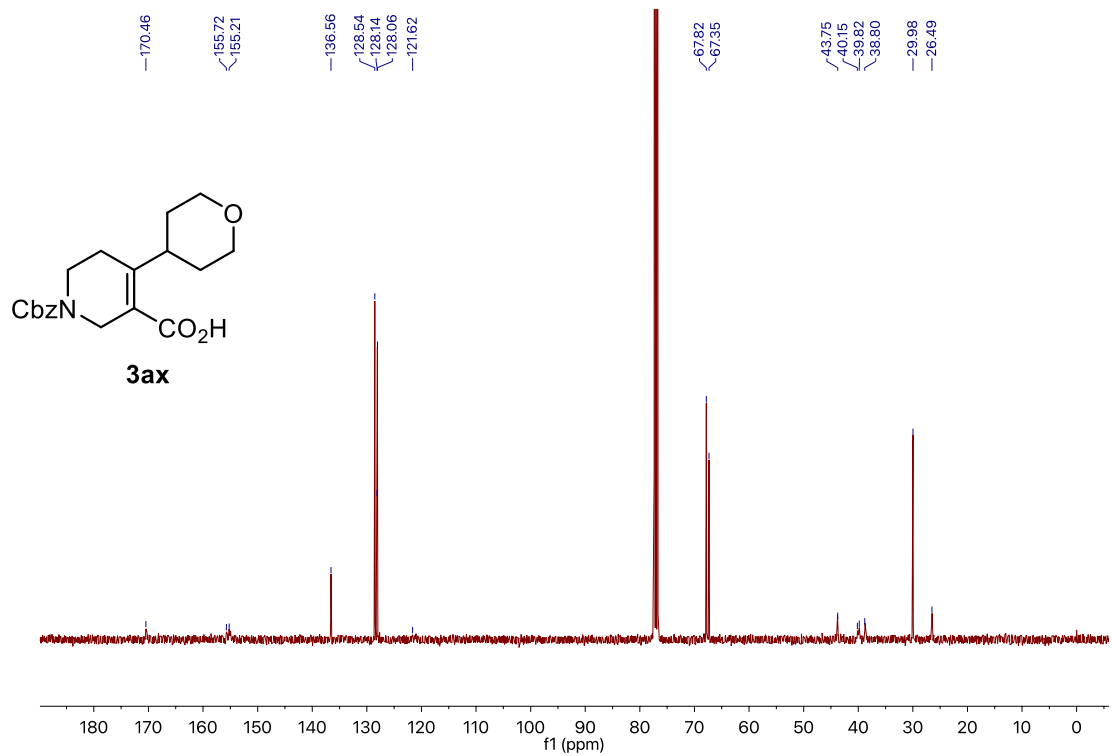

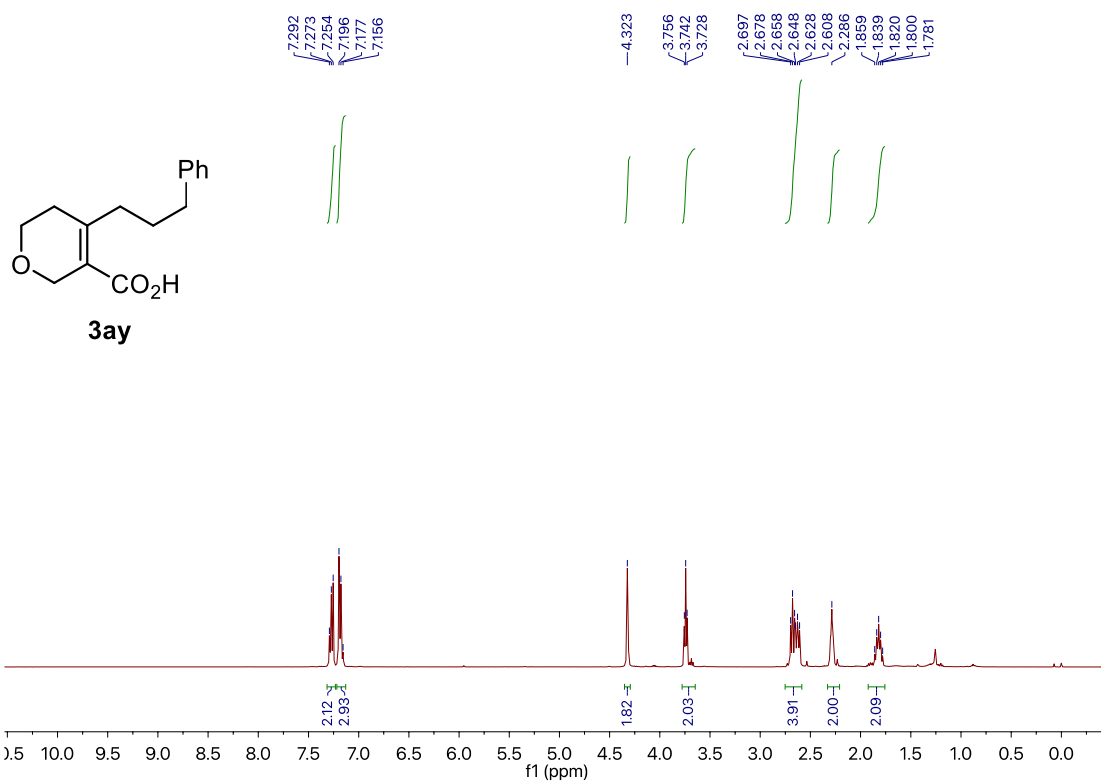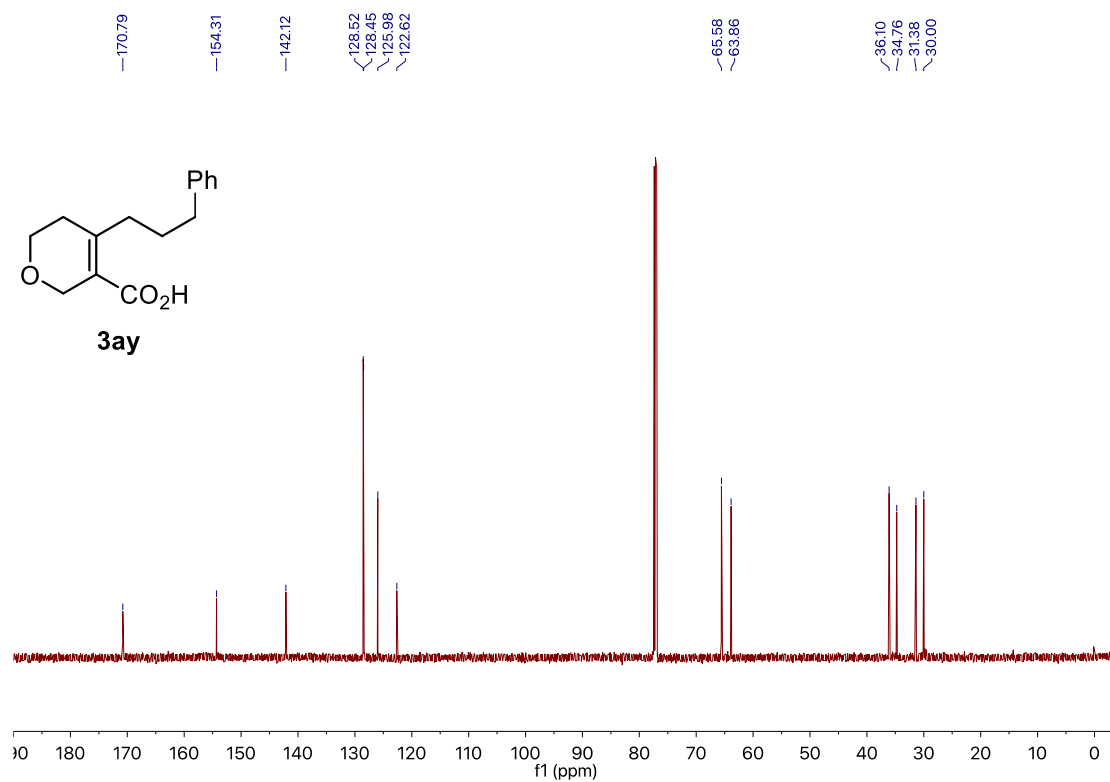

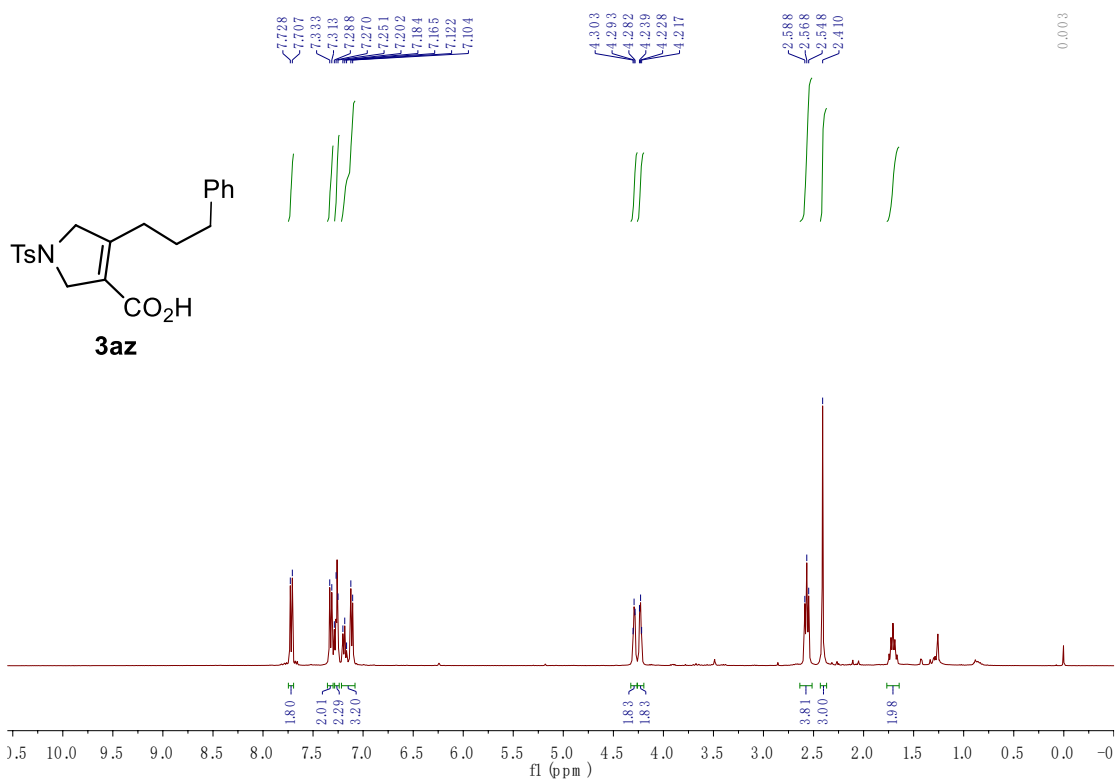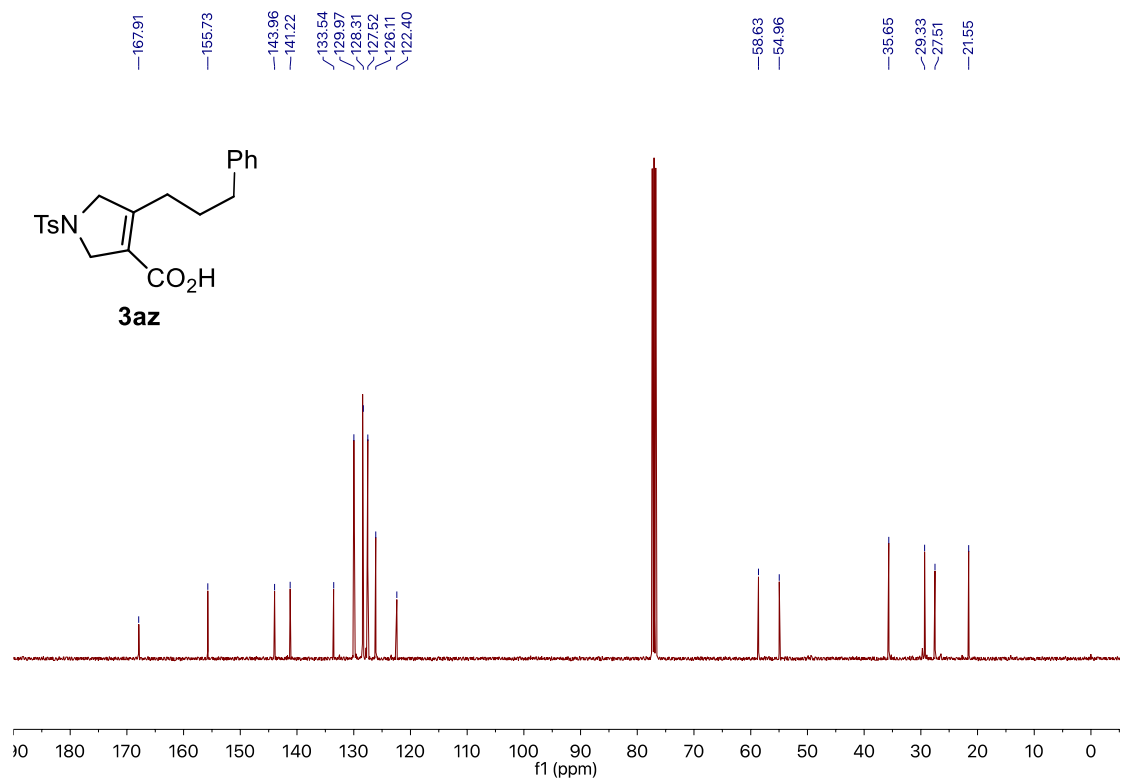

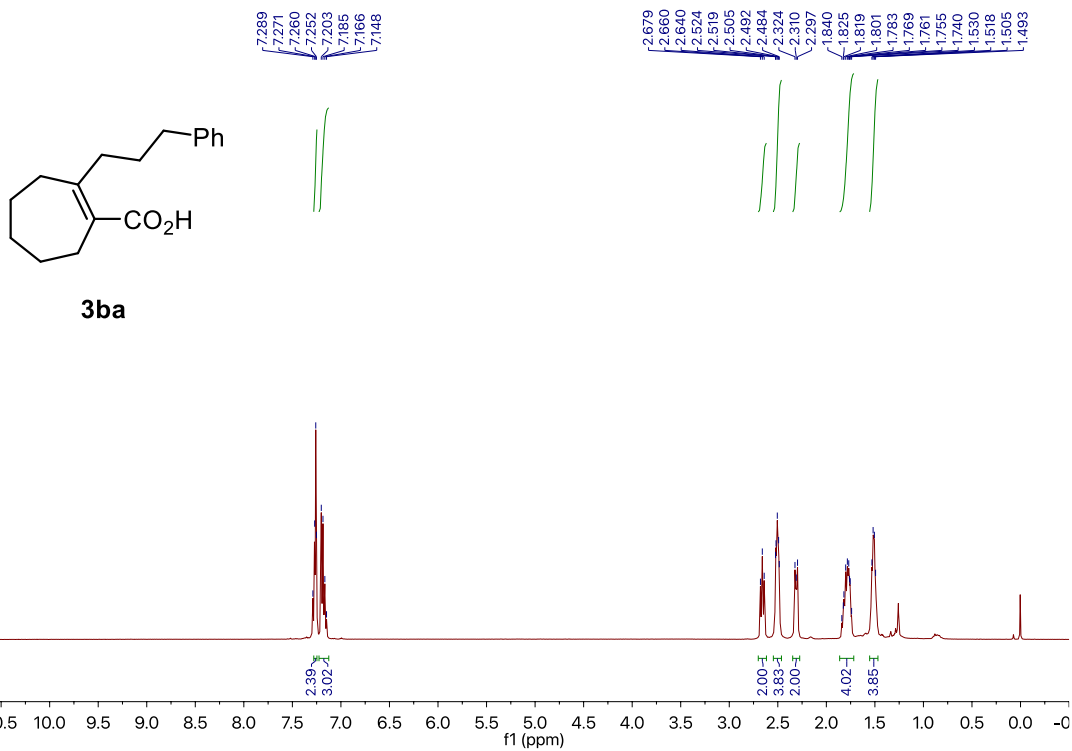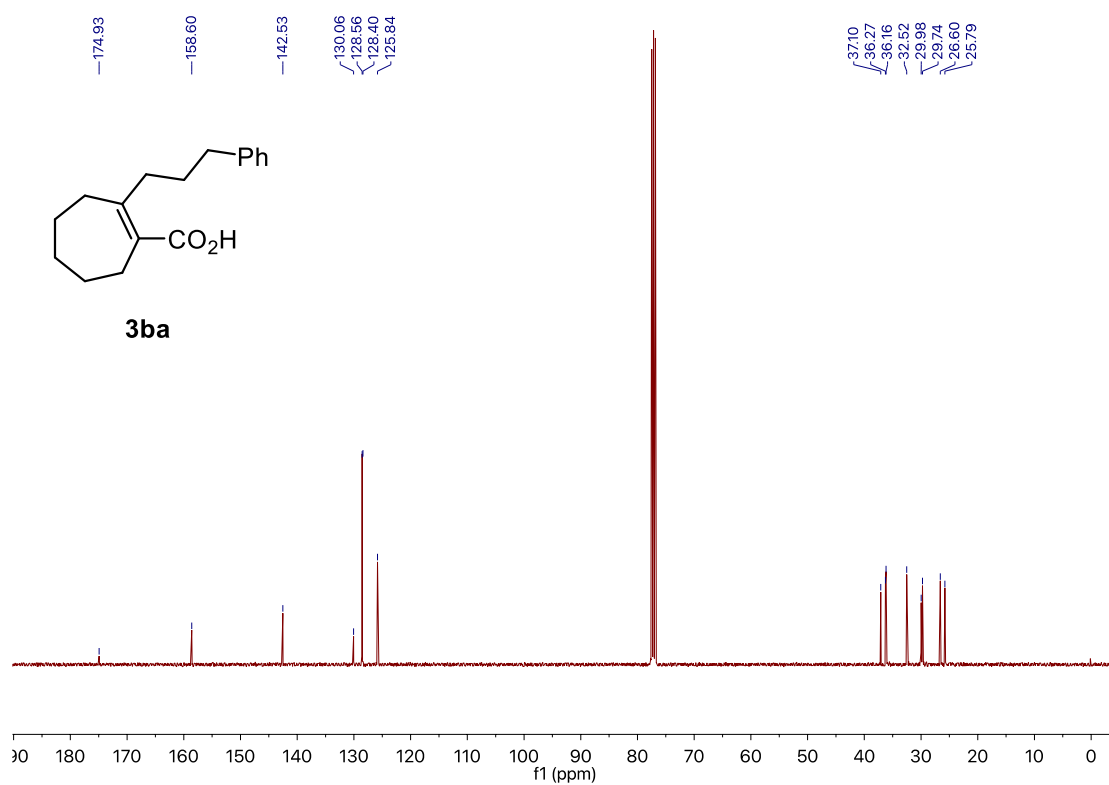

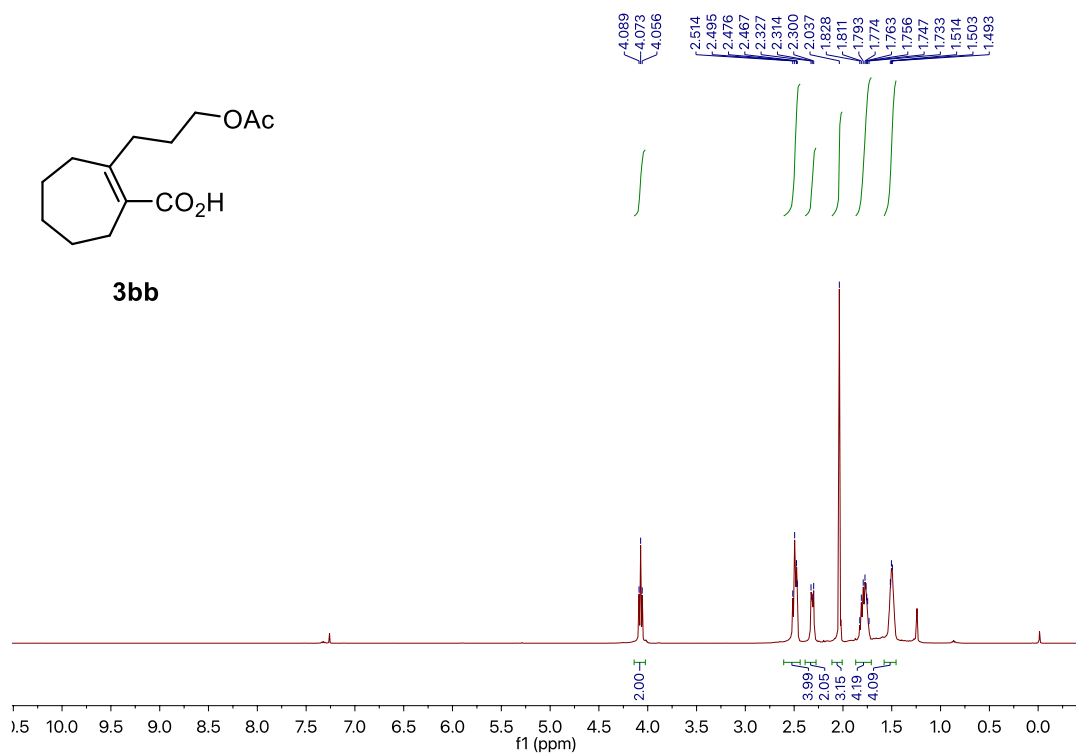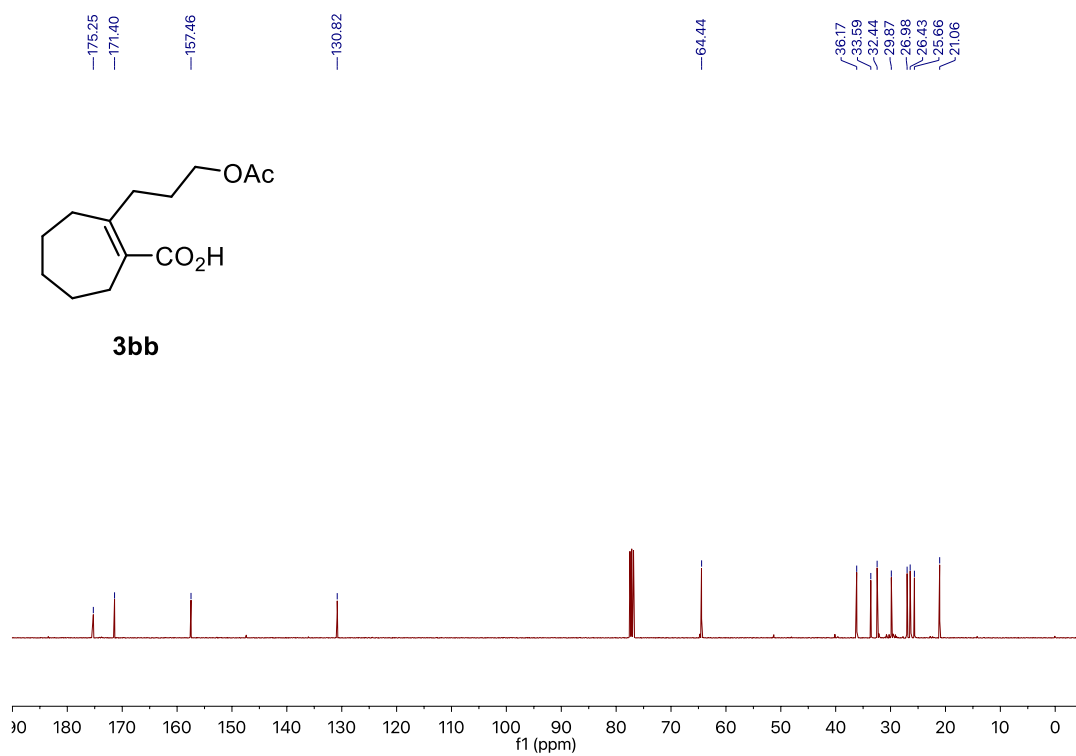

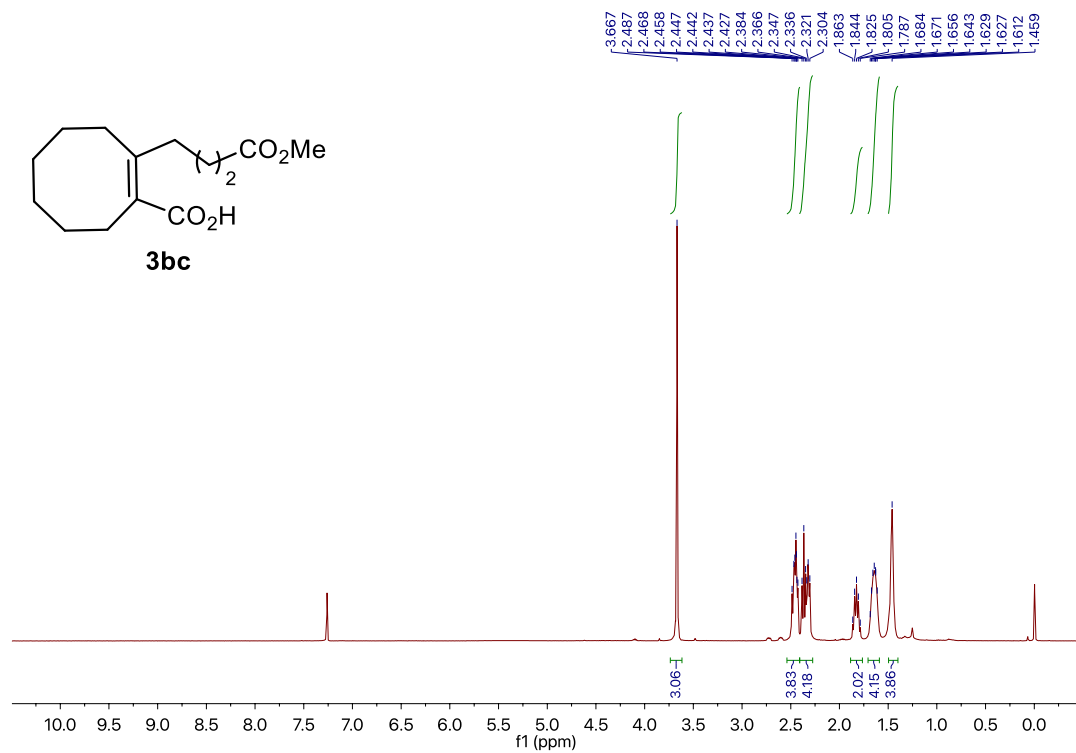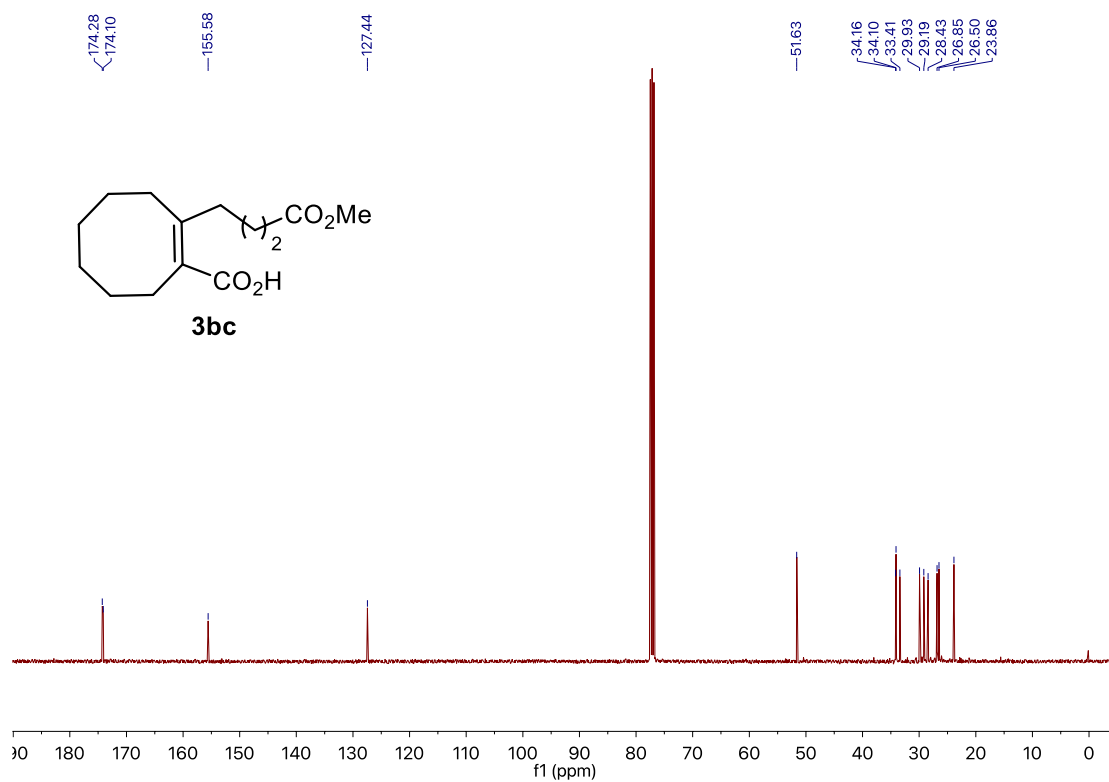

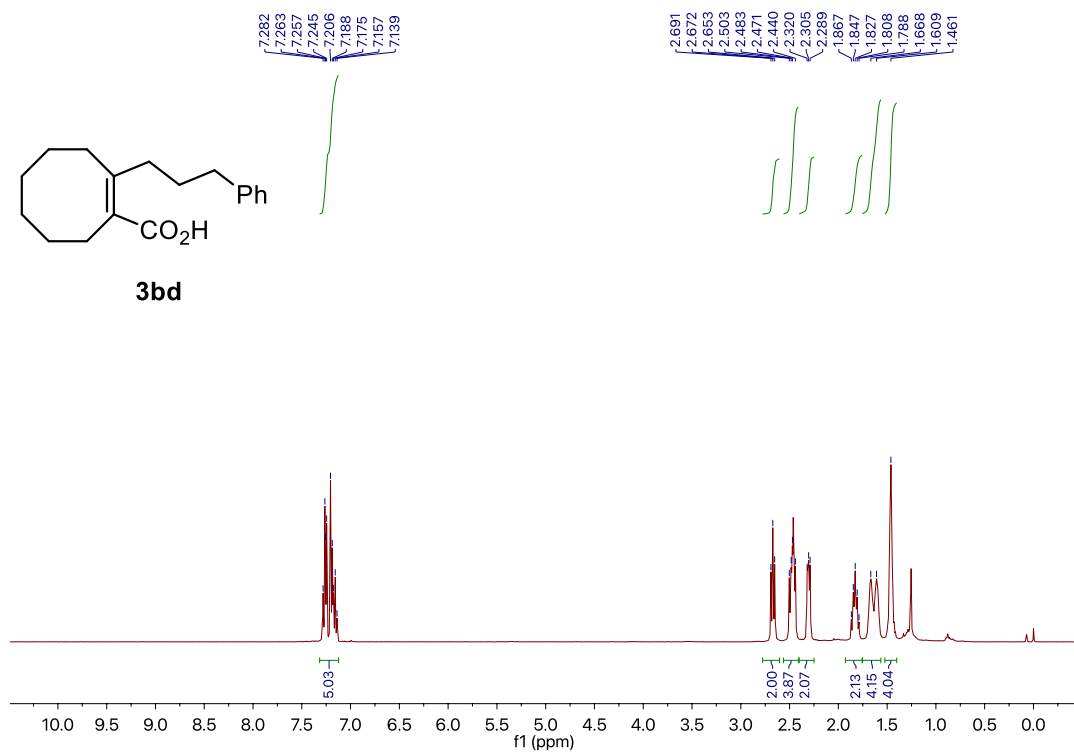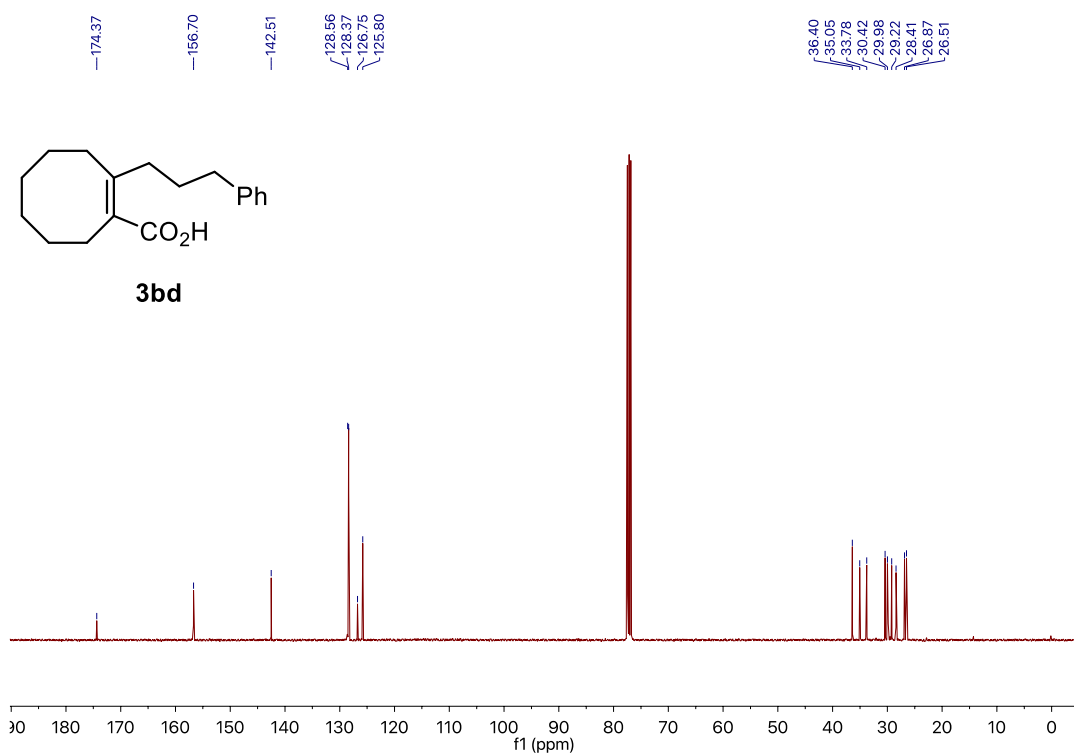

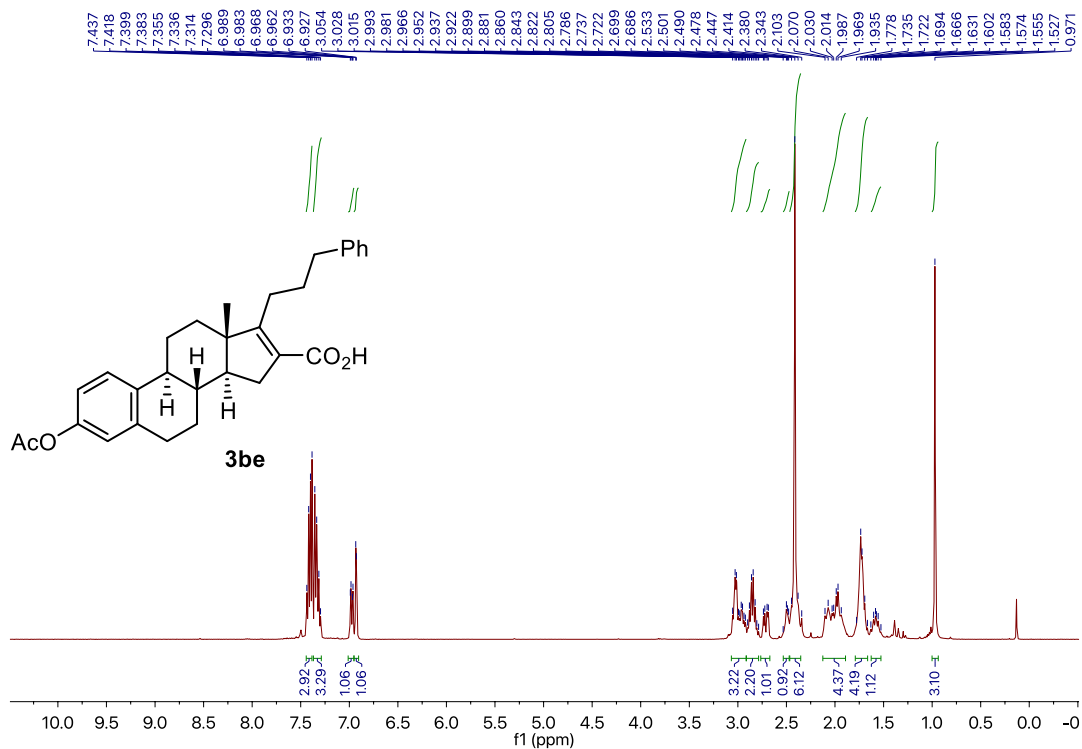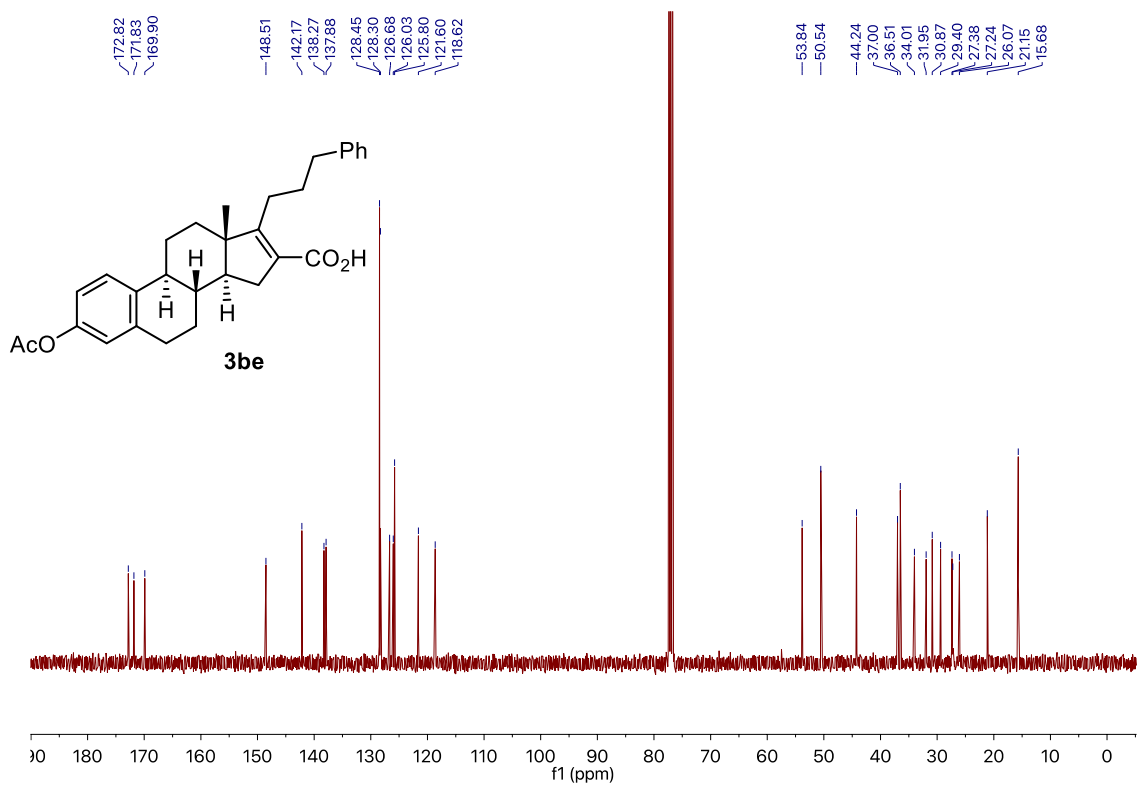

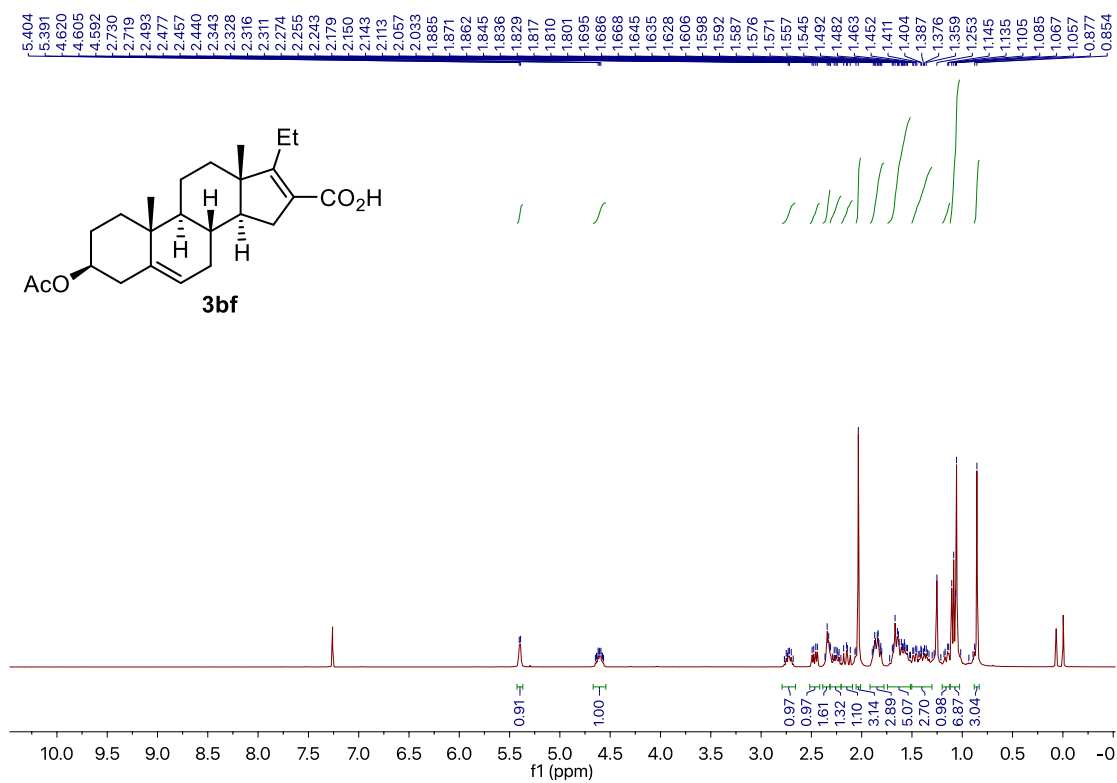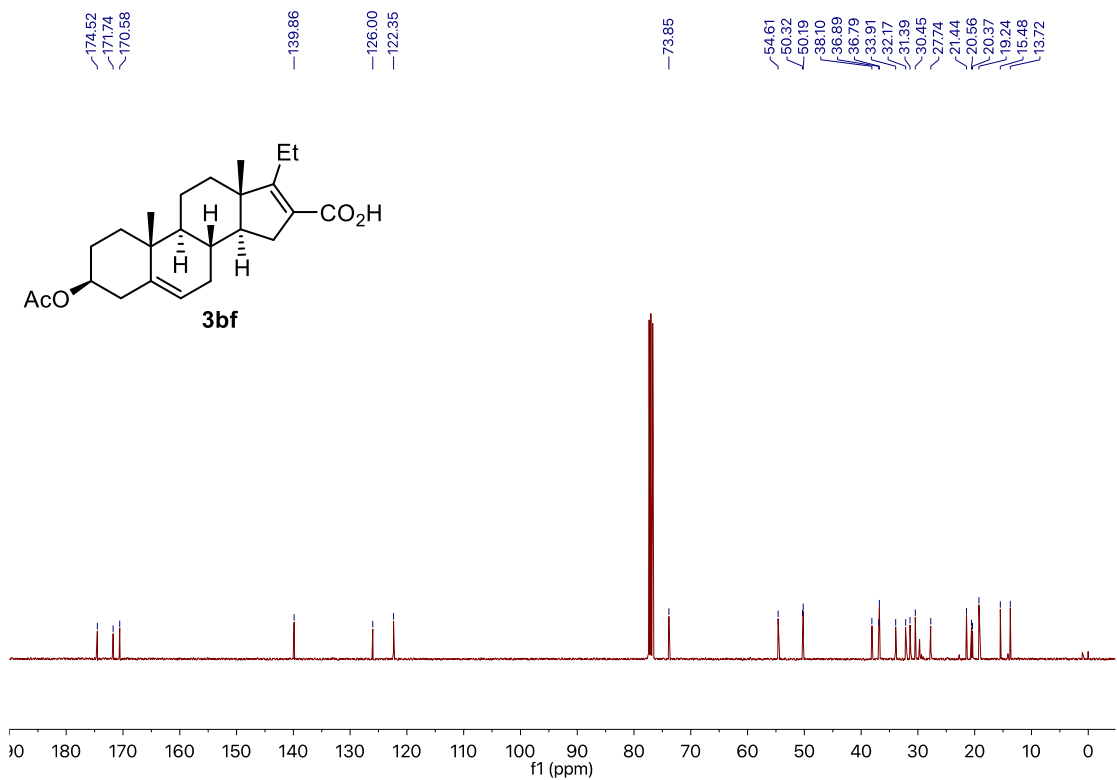

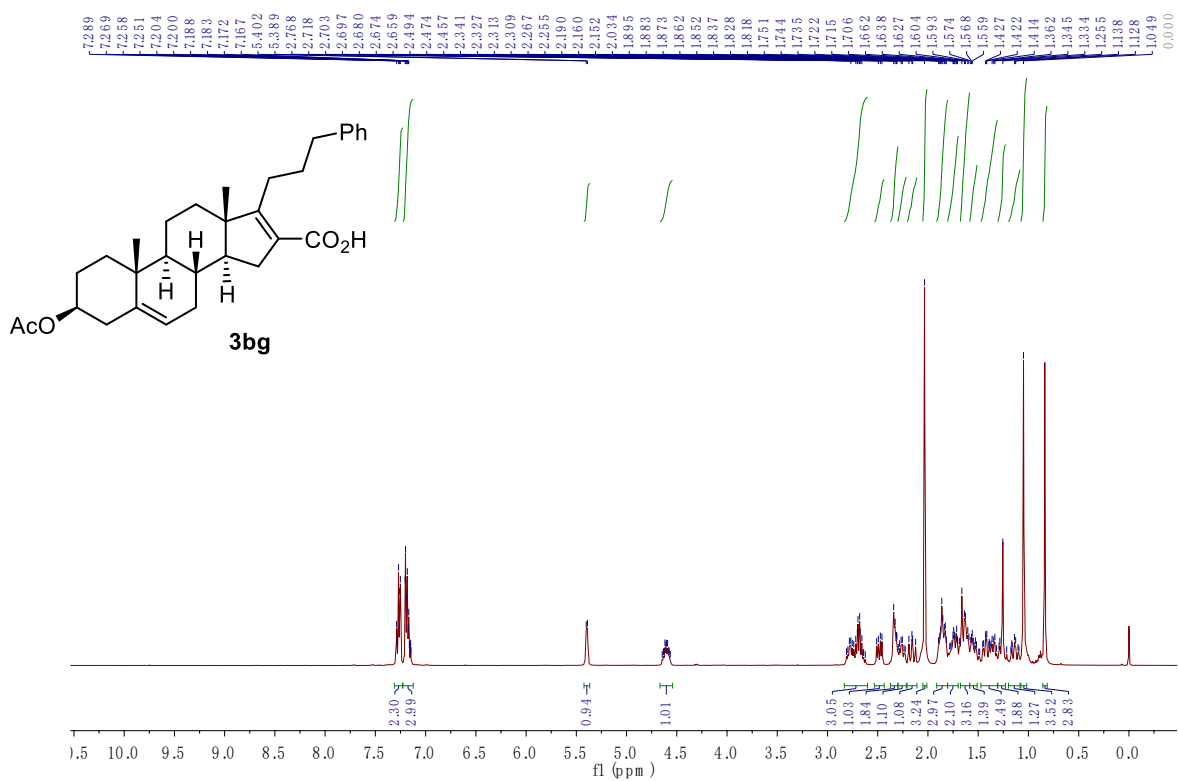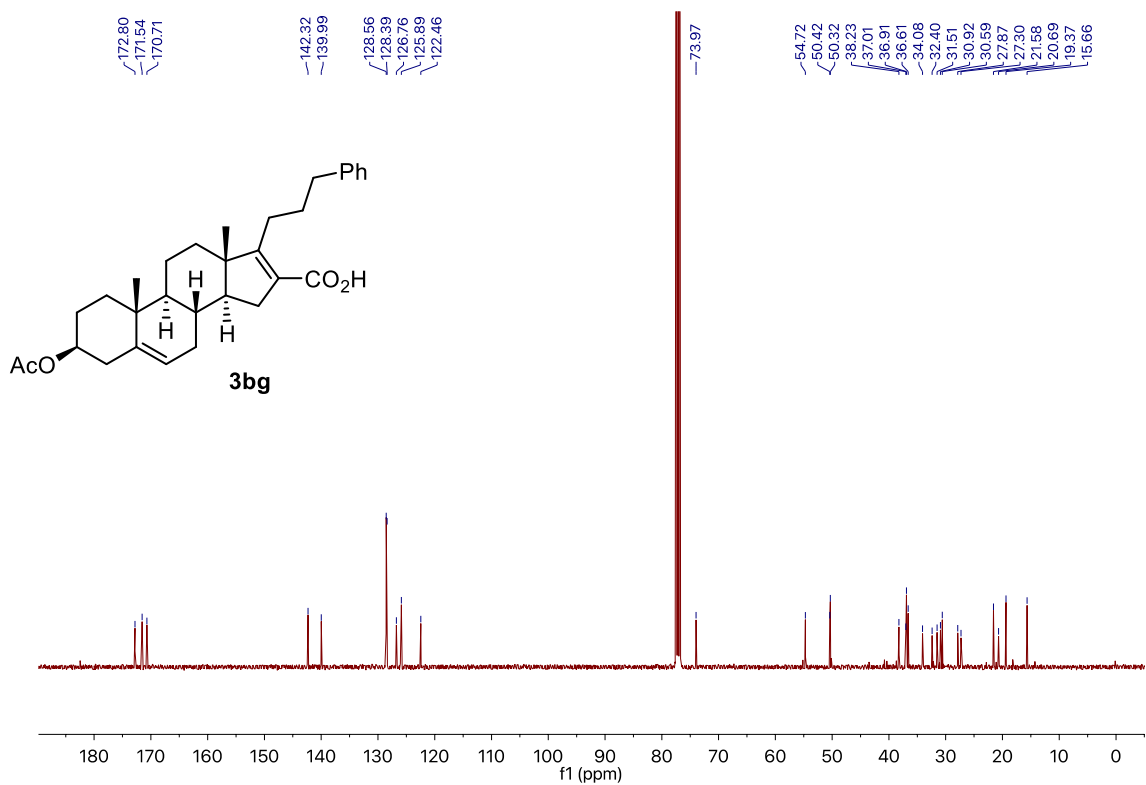

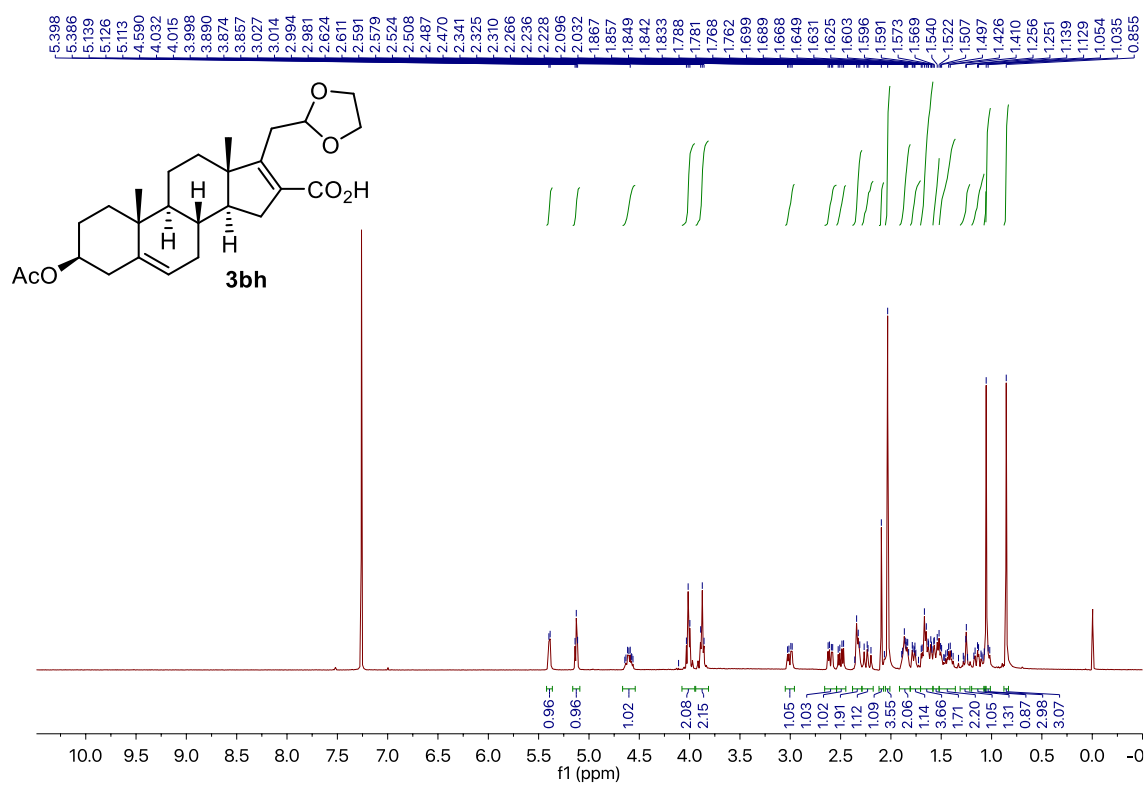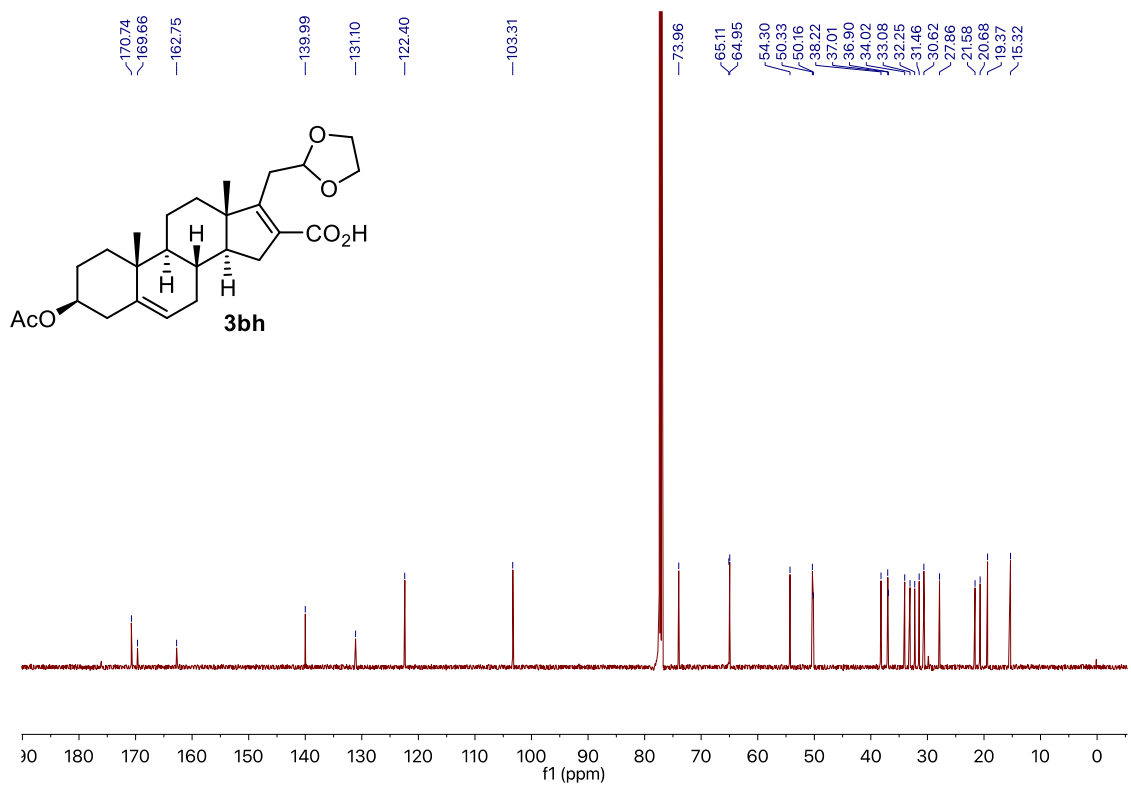

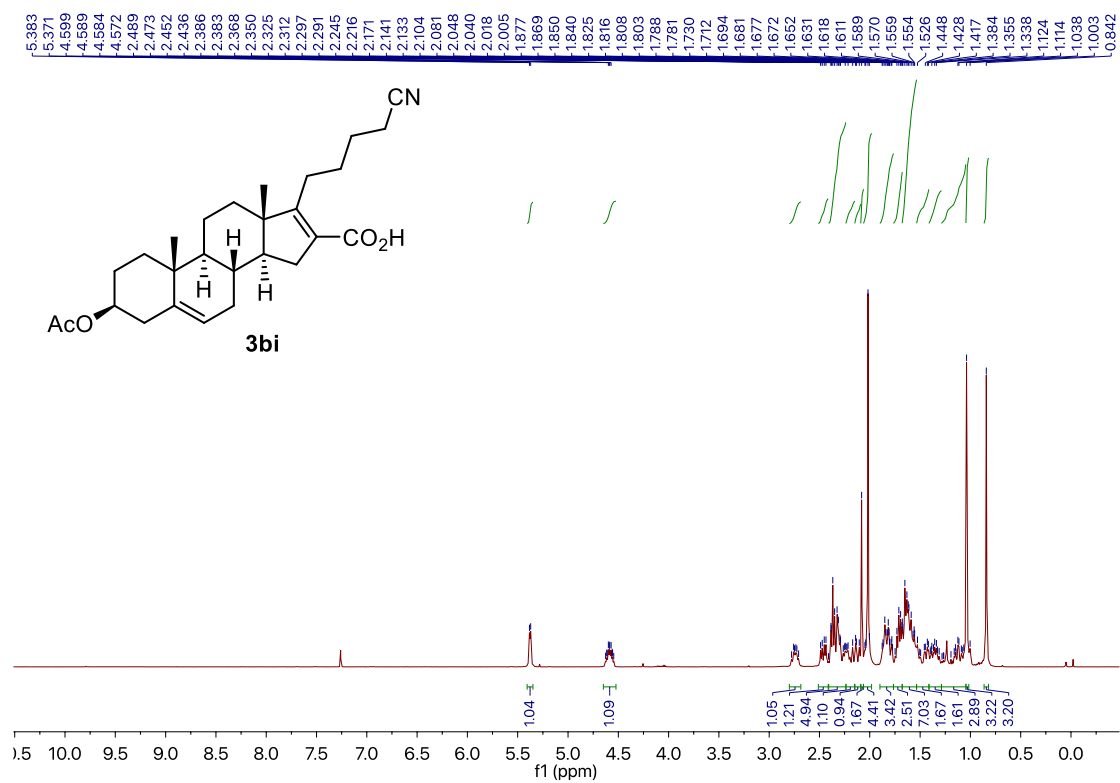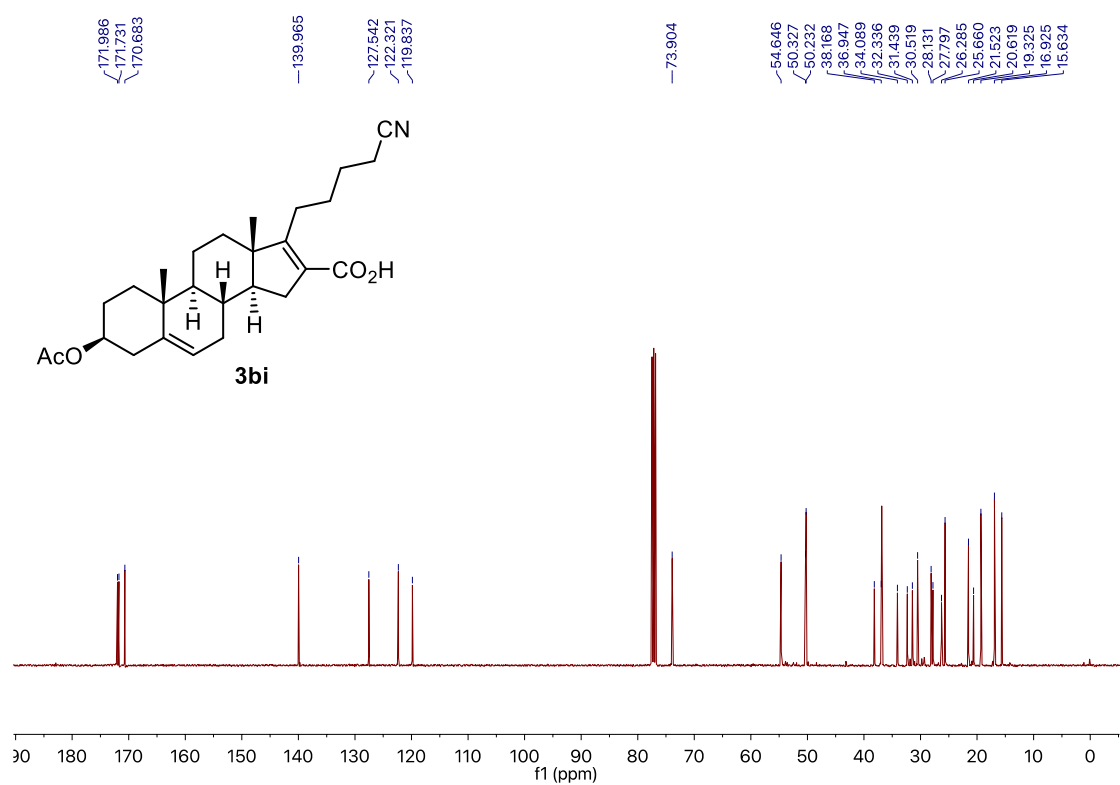

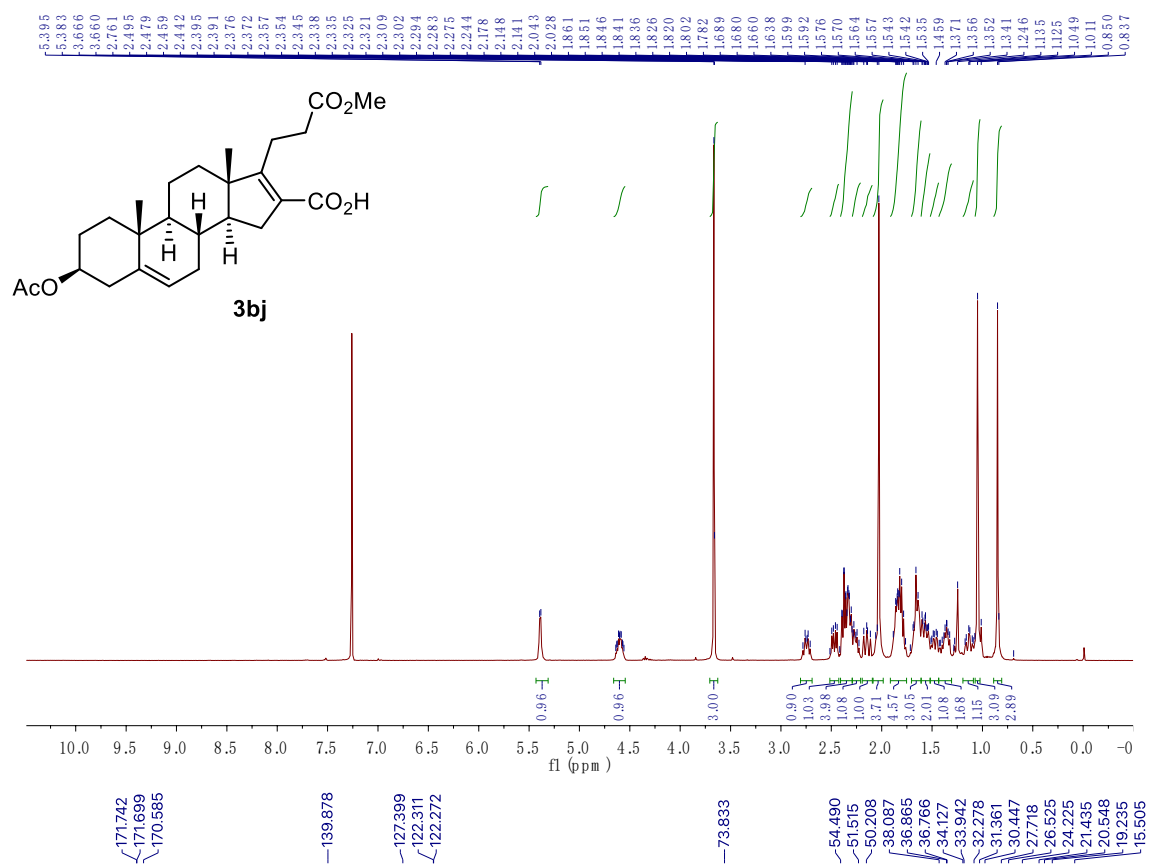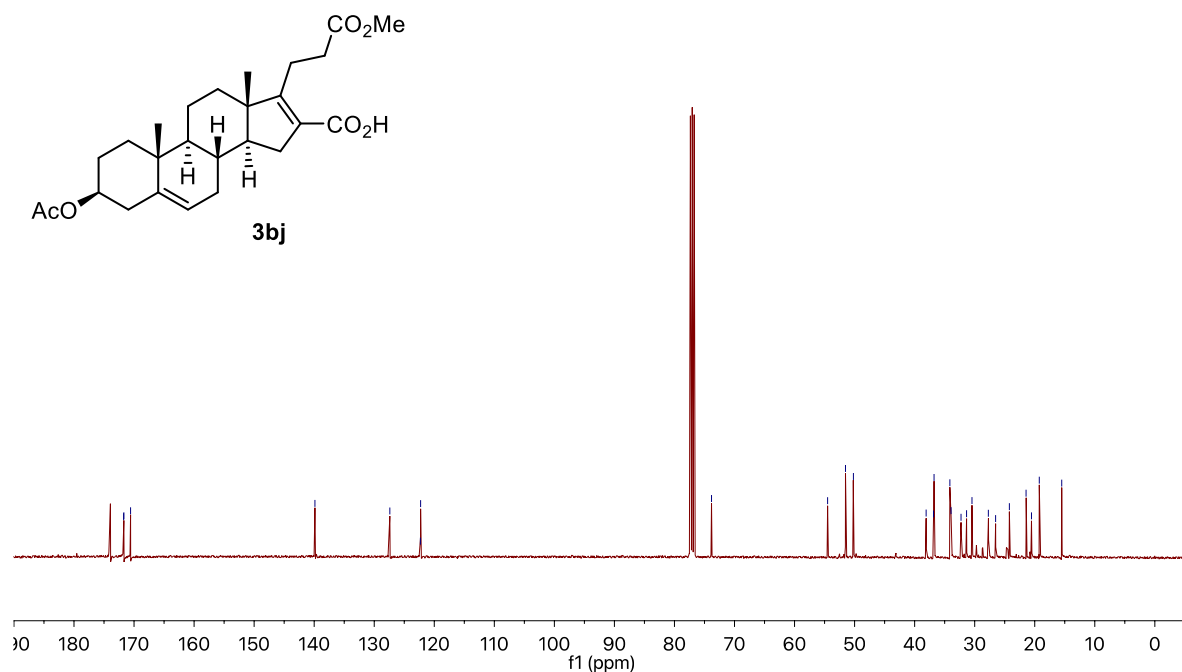

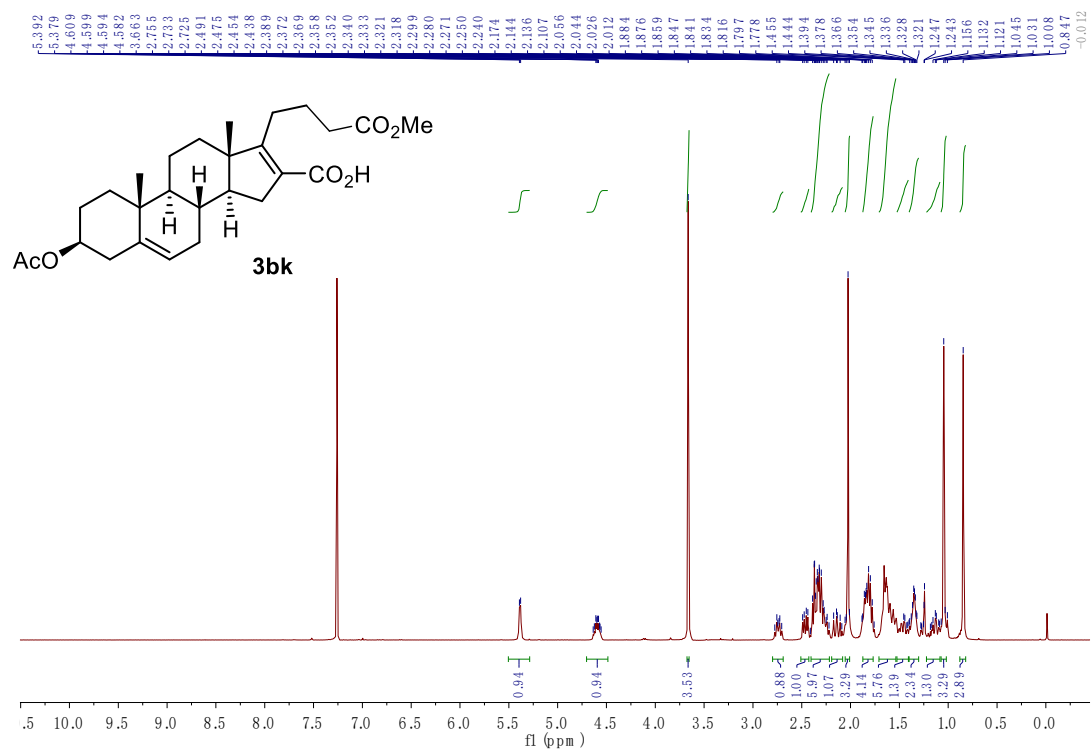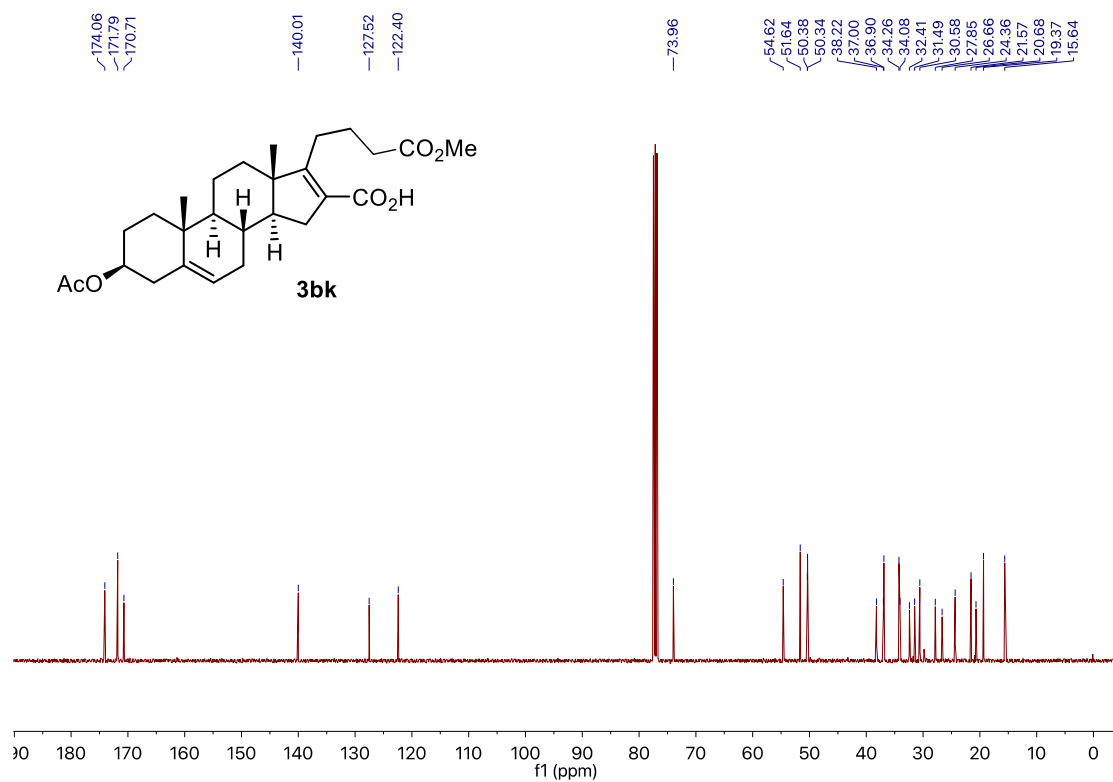

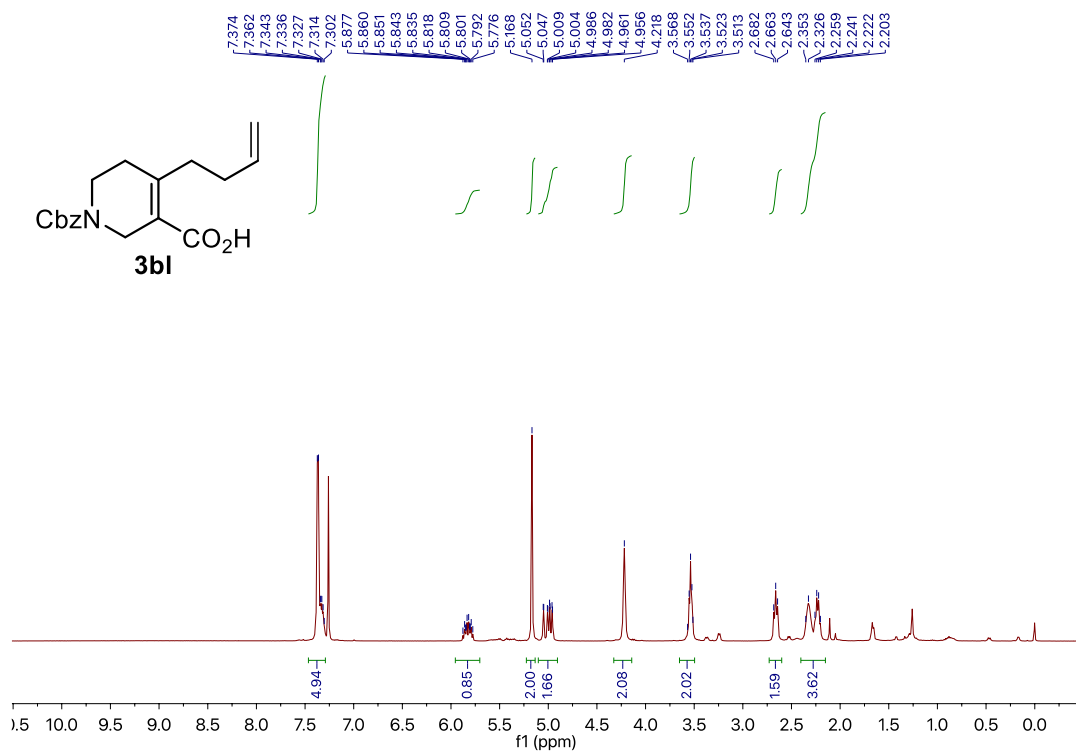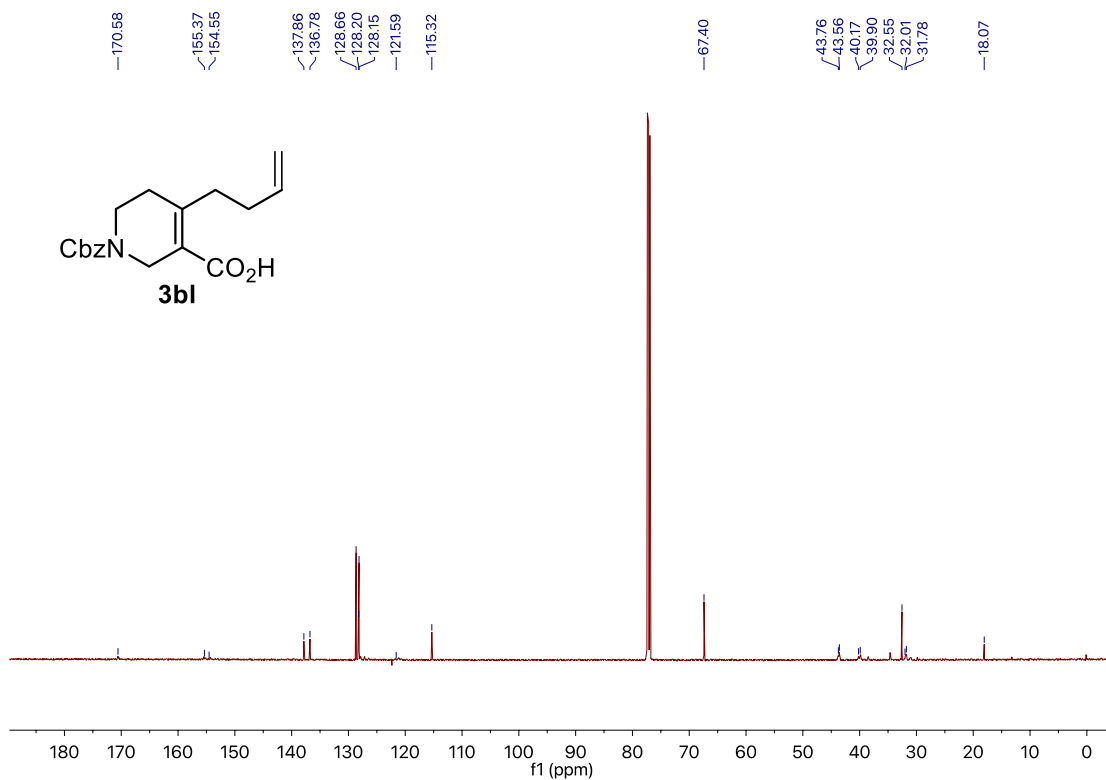

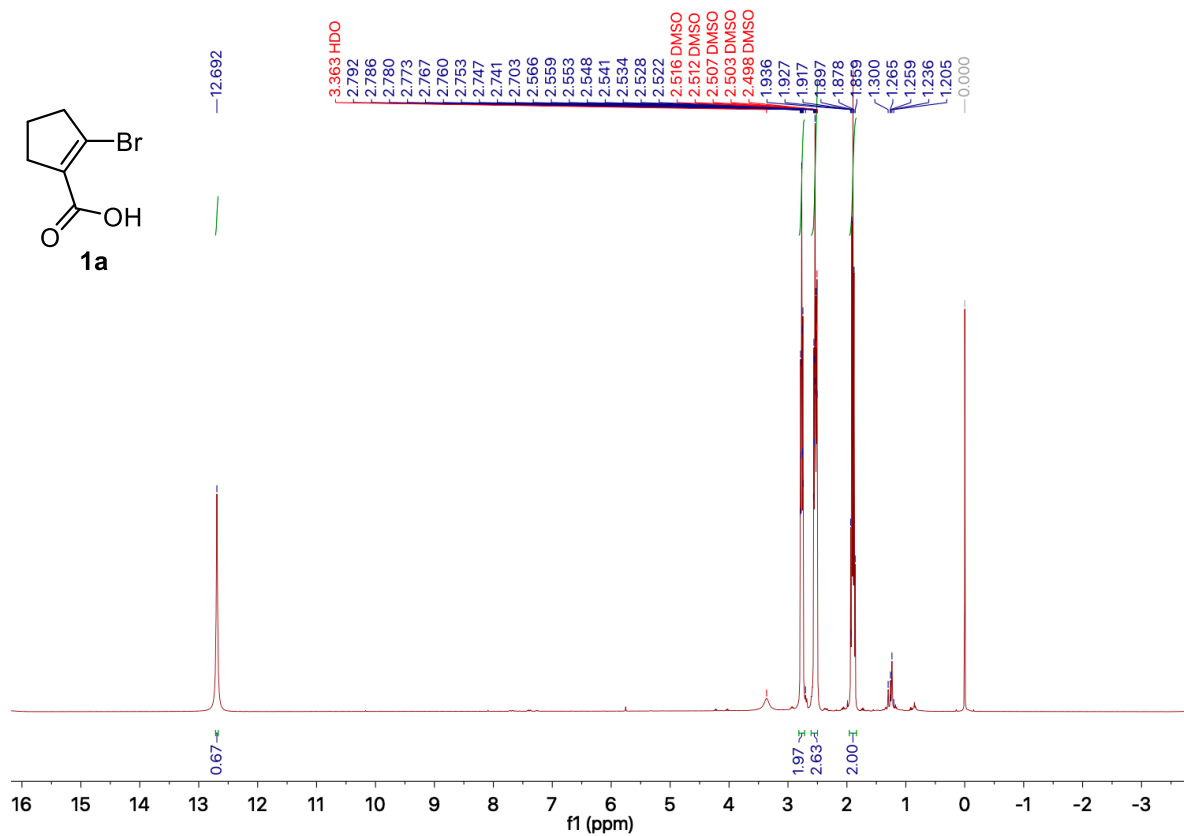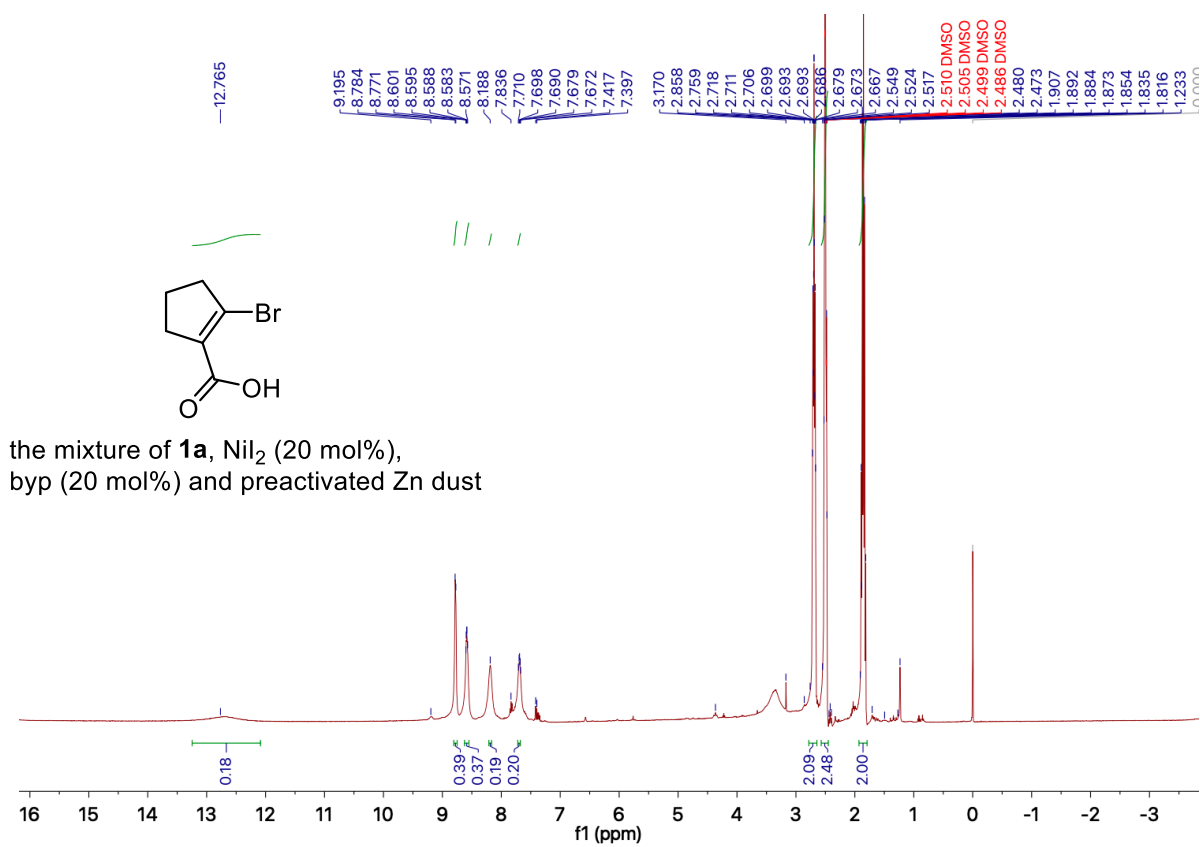

Supplement: d3qo00155e1.pdf [file d3qo00155e1.pdf]
